# Supplementary material for: Accelerated brain aging towards transcriptional inversion in a zebrafish model of the K115fs mutation of human PSEN2
Source: PLoS One. 2020 Jan 24;15(1):e0227258. doi: 10.1371/journal.pone.0227258 (PMC6980398; doi:10.1371/journal.pone.0227258)
Supplement: S7 Table — These genes have a 90% match for the GRE motif in the region 1500bp upstream to 200bp downstream of the transcription start site. (XLSX) [file pone.0227258.s008.xlsx]

## Sheet: GREGenes_in_Background
Ensembl Gene ID	Gene Name	Chromosome	Start	End	Strand	Biotype	Description
ENSDARG00000002791	atp1a1a.1	chr1	1569316	1571015	+	protein_coding	ATPase, Na+/K+ transporting, alpha 1a polypeptide, tandem duplicate 1 [Source:ZFIN;Acc:ZDB-GENE-001212-1]
ENSDARG00000058480	chtf18	chr1	8513419	8515118	+	protein_coding	CTF18, chromosome transmission fidelity factor 18 homolog (S. cerevisiae) [Source:ZFIN;Acc:ZDB-GENE-050522-508]
ENSDARG00000077804	hgsnat	chr1	14538278	14539977	+	protein_coding	heparan-alpha-glucosaminide N-acetyltransferase [Source:ZFIN;Acc:ZDB-GENE-140106-144]
ENSDARG00000003631	clockb	chr1	18739770	18741469	+	protein_coding	clock circadian regulator b [Source:ZFIN;Acc:ZDB-GENE-030408-2]
ENSDARG00000061121	adgrl3.1	chr1	22349420	22351119	-	protein_coding	adhesion G protein-coupled receptor L3.1 [Source:ZFIN;Acc:ZDB-GENE-030131-7856]
ENSDARG00000037261	mtap	chr1	25415770	25417469	+	protein_coding	methylthioadenosine phosphorylase [Source:ZFIN;Acc:ZDB-GENE-040426-1505]
ENSDARG00000092604	si:ch211-15j1.4	chr1	57401919	57403618	+	protein_coding	si:ch211-15j1.4 [Source:ZFIN;Acc:ZDB-GENE-081031-6]
ENSDARG00000078308	spry2	chr1	4556034	4557733	+	protein_coding	sprouty RTK signaling antagonist 2 [Source:ZFIN;Acc:ZDB-GENE-030131-7038]
ENSDARG00000058463	ndufab1a	chr1	8434361	8436060	-	protein_coding	NADH dehydrogenase (ubiquinone) 1, alpha/beta subcomplex, 1a [Source:ZFIN;Acc:ZDB-GENE-040801-1]
ENSDARG00000076174	trim2b	chr1	9317755	9319454	+	protein_coding	tripartite motif containing 2b [Source:ZFIN;Acc:ZDB-GENE-090312-70]
ENSDARG00000008487	dmd	chr1	10165641	10167340	-	protein_coding	dystrophin [Source:ZFIN;Acc:ZDB-GENE-010426-1]
ENSDARG00000037406	wdr19	chr1	20834235	20835934	-	protein_coding	WD repeat domain 19 [Source:ZFIN;Acc:ZDB-GENE-090313-277]
ENSDARG00000089138	si:ch1073-440b2.1	chr1	27779574	27781273	-	protein_coding	si:ch1073-440b2.1 [Source:ZFIN;Acc:ZDB-GENE-030131-8303]
ENSDARG00000053463	poglut1	chr1	28082368	28084067	-	protein_coding	protein O-glucosyltransferase 1 [Source:ZFIN;Acc:ZDB-GENE-051120-24]
ENSDARG00000029751	wbp1lb	chr1	30940228	30941927	+	protein_coding	WW domain binding protein 1-like b [Source:ZFIN;Acc:ZDB-GENE-050522-112]
ENSDARG00000012896	anos1a	chr1	31208892	31210591	+	protein_coding	anosmin 1a [Source:ZFIN;Acc:ZDB-GENE-000201-9]
ENSDARG00000012763	arl13b	chr1	32934161	32935860	+	protein_coding	ADP-ribosylation factor-like 13b [Source:ZFIN;Acc:ZDB-GENE-021217-3]
ENSDARG00000074860	slc5a7a	chr1	33509162	33510861	+	protein_coding	solute carrier family 5 (sodium/choline cotransporter), member 7a [Source:ZFIN;Acc:ZDB-GENE-090313-273]
ENSDARG00000075098	wdr17	chr1	38056489	38058188	+	protein_coding	WD repeat domain 17 [Source:ZFIN;Acc:ZDB-GENE-090313-131]
ENSDARG00000053222	asb5b	chr1	38095176	38096875	-	protein_coding	ankyrin repeat and SOCS box containing 5b [Source:ZFIN;Acc:ZDB-GENE-050417-271]
ENSDARG00000052696	bdh2	chr1	43026192	43027891	-	protein_coding	3-hydroxybutyrate dehydrogenase, type 2 [Source:ZFIN;Acc:ZDB-GENE-050417-343]
ENSDARG00000019778	rps6	chr1	44348101	44349800	-	protein_coding	ribosomal protein S6 [Source:ZFIN;Acc:ZDB-GENE-040801-8]
ENSDARG00000026902	cryzl1	chr1	46403092	46404791	+	protein_coding	crystallin, zeta (quinone reductase)-like 1 [Source:ZFIN;Acc:ZDB-GENE-040718-378]
ENSDARG00000100792	zgc:154142	chr1	50194162	50195861	-	protein_coding	zgc:154142 [Source:ZFIN;Acc:ZDB-GENE-070615-2]
ENSDARG00000020494	znf330	chr1	52640029	52641728	-	protein_coding	zinc finger protein 330 [Source:ZFIN;Acc:ZDB-GENE-040426-2697]
ENSDARG00000096651	gpr108	chr1	58368736	58370435	+	protein_coding	G protein-coupled receptor 108 [Source:ZFIN;Acc:ZDB-GENE-121214-129]
ENSDARG00000091359	CABZ01118678.2	chr1	58399941	58401640	-	protein_coding
ENSDARG00000103038	pik3r3a	chr2	3123865	3125564	+	protein_coding	phosphoinositide-3-kinase, regulatory subunit 3a (gamma) [Source:ZFIN;Acc:ZDB-GENE-040426-1978]
ENSDARG00000061371	cdh18a	chr2	29272941	29274640	+	protein_coding	cadherin 18, type 2a [Source:ZFIN;Acc:ZDB-GENE-060929-316]
ENSDARG00000074233	pde4bb	chr2	14918435	14920134	-	protein_coding	phosphodiesterase 4B, cAMP-specific b [Source:ZFIN;Acc:ZDB-GENE-070912-454]
ENSDARG00000013044	ndufv2	chr2	54909526	54911225	+	protein_coding	NADH dehydrogenase (ubiquinone) flavoprotein 2 [Source:ZFIN;Acc:ZDB-GENE-040426-1713]
ENSDARG00000088634	adcy1b	chr2	167619	169318	-	protein_coding	adenylate cyclase 1b [Source:ZFIN;Acc:ZDB-GENE-100805-1]
ENSDARG00000104777	MOV10L1	chr2	166763	168462	+	protein_coding	zgc:154086 [Source:ZFIN;Acc:ZDB-GENE-061013-333]
ENSDARG00000063445	snap47	chr2	3571642	3573341	-	protein_coding	synaptosomal-associated protein, 47 [Source:ZFIN;Acc:ZDB-GENE-060825-140]
ENSDARG00000058995	jmjd4	chr2	3570584	3572283	+	protein_coding	jumonji domain containing 4 [Source:ZFIN;Acc:ZDB-GENE-060929-636]
ENSDARG00000100981	CCDC39	chr2	7898411	7900110	-	protein_coding	coiled-coil domain containing 39 [Source:HGNC Symbol;Acc:HGNC:25244]
ENSDARG00000075812	kcnt2	chr2	12295920	12297619	-	protein_coding	potassium channel, subfamily T, member 2 [Source:ZFIN;Acc:ZDB-GENE-130530-783]
ENSDARG00000075673	arhgap21b	chr2	12716968	12718667	+	protein_coding	Rho GTPase activating protein 21b [Source:ZFIN;Acc:ZDB-GENE-030131-4944]
ENSDARG00000097553	BX908750.1	chr2	13114079	13115778	+	lincRNA
ENSDARG00000039142	arpc5a	chr2	21308110	21309809	+	protein_coding	actin related protein 2/3 complex, subunit 5A [Source:ZFIN;Acc:ZDB-GENE-030131-8448]
ENSDARG00000001940	dnajc1	chr2	21518482	21520181	+	protein_coding	DnaJ (Hsp40) homolog, subfamily C, member 1 [Source:ZFIN;Acc:ZDB-GENE-061103-529]
ENSDARG00000039052	klhl40a	chr2	21676870	21678569	-	protein_coding	kelch-like family member 40a [Source:ZFIN;Acc:ZDB-GENE-050916-1]
ENSDARG00000075211	chd7	chr2	22110294	22111993	-	protein_coding	chromodomain helicase DNA binding protein 7 [Source:ZFIN;Acc:ZDB-GENE-070912-179]
ENSDARG00000056475	trnau1apb	chr2	24661586	24663285	-	protein_coding	tRNA selenocysteine 1 associated protein 1b [Source:ZFIN;Acc:ZDB-GENE-040426-2386]
ENSDARG00000003607	nr2f6a	chr2	24717153	24718852	+	protein_coding	nuclear receptor subfamily 2, group F, member 6a [Source:ZFIN;Acc:ZDB-GENE-030131-4362]
ENSDARG00000038812	e2f5	chr2	31702986	31704685	-	protein_coding	E2F transcription factor 5 [Source:ZFIN;Acc:ZDB-GENE-030828-3]
ENSDARG00000008784	prpf4ba	chr2	32842691	32844390	-	protein_coding	pre-mRNA processing factor 4Ba [Source:ZFIN;Acc:ZDB-GENE-040426-947]
ENSDARG00000068366	si:dkey-154p10.3	chr2	32844163	32845862	+	protein_coding	si:dkey-154p10.3 [Source:ZFIN;Acc:ZDB-GENE-070912-380]
ENSDARG00000038754	plk3	chr2	35619679	35621378	+	protein_coding	polo-like kinase 3 (Drosophila) [Source:ZFIN;Acc:ZDB-GENE-030131-6134]
ENSDARG00000019596	nrd1a	chr2	36844285	36845984	+	protein_coding	nardilysin a (N-arginine dibasic convertase) [Source:ZFIN;Acc:ZDB-GENE-070912-417]
ENSDARG00000095090	tspan37	chr2	37157767	37159466	-	protein_coding	tetraspanin 37 [Source:ZFIN;Acc:ZDB-GENE-070912-550]
ENSDARG00000077996	cdh24b	chr2	38572366	38574065	+	protein_coding	cadherin 24, type 2b [Source:ZFIN;Acc:ZDB-GENE-081104-50]
ENSDARG00000038743	copb2	chr2	39032923	39034622	-	protein_coding	coatomer protein complex, subunit beta 2 [Source:ZFIN;Acc:ZDB-GENE-010724-7]
ENSDARG00000052997	sema4e	chr2	49836328	49838027	+	protein_coding	semaphorin 4e [Source:ZFIN;Acc:ZDB-GENE-990715-7]
ENSDARG00000074846	si:dkeyp-68b7.12	chr2	57876079	57877778	-	protein_coding	si:dkeyp-68b7.12 [Source:ZFIN;Acc:ZDB-GENE-141212-333]
ENSDARG00000046107	caskin1	chr3	35670710	35672409	-	protein_coding	CASK interacting protein 1 [Source:ZFIN;Acc:ZDB-GENE-071115-3]
ENSDARG00000059773	SRCIN1	chr3	37334418	37336117	-	protein_coding	si:ch211-278a6.1 [Source:ZFIN;Acc:ZDB-GENE-060503-699]
ENSDARG00000078281	zgc:173575	chr3	61967727	61969426	+	protein_coding	zgc:173575 [Source:ZFIN;Acc:ZDB-GENE-080218-25]
ENSDARG00000069514	CABZ01034854.1	chr3	4701908	4703607	-	protein_coding
ENSDARG00000059805	slc25a38a	chr3	4753273	4754972	-	protein_coding	solute carrier family 25, member 38a [Source:ZFIN;Acc:ZDB-GENE-060929-320]
ENSDARG00000105177	ilf3b	chr3	13698816	13700515	+	protein_coding	interleukin enhancer binding factor 3b [Source:ZFIN;Acc:ZDB-GENE-030131-587]
ENSDARG00000077737	spsb3a	chr3	15889620	15891319	-	protein_coding	splA/ryanodine receptor domain and SOCS box containing 3a [Source:ZFIN;Acc:ZDB-GENE-030131-4182]
ENSDARG00000038213	slc35b1	chr3	20832553	20834252	-	protein_coding	solute carrier family 35, member B1 [Source:ZFIN;Acc:ZDB-GENE-040912-148]
ENSDARG00000038068	ddx5	chr3	25144656	25146355	-	protein_coding	DEAD (Asp-Glu-Ala-Asp) box helicase 5 [Source:ZFIN;Acc:ZDB-GENE-030131-925]
ENSDARG00000104581	tom1	chr3	25775253	25776952	+	protein_coding	target of myb1 membrane trafficking protein [Source:ZFIN;Acc:ZDB-GENE-060721-1]
ENSDARG00000037980	tceb2	chr3	30948205	30949904	-	protein_coding	transcription elongation factor B (SIII), polypeptide 2 [Source:ZFIN;Acc:ZDB-GENE-020415-1]
ENSDARG00000097646	BX511021.3	chr3	32055472	32057171	-	processed_transcript
ENSDARG00000096849	si:dkey-16p21.8	chr3	32205740	32207439	-	protein_coding	si:dkey-16p21.8 [Source:ZFIN;Acc:ZDB-GENE-131121-428]
ENSDARG00000053455	ccdc103	chr3	33290825	33292524	-	protein_coding	coiled-coil domain containing 103 [Source:ZFIN;Acc:ZDB-GENE-040718-253]
ENSDARG00000082930	SNORA74	chr3	34027866	34029565	+	snoRNA	Small nucleolar RNA SNORA74 [Source:RFAM;Acc:RF00090]
ENSDARG00000037916	cdk5r1a	chr3	34690318	34692017	+	protein_coding	cyclin-dependent kinase 5, regulatory subunit 1a (p35) [Source:ZFIN;Acc:ZDB-GENE-080723-17]
ENSDARG00000104413	rogdi	chr3	36298648	36300347	-	protein_coding	rogdi homolog (Drosophila) [Source:ZFIN;Acc:ZDB-GENE-030131-7582]
ENSDARG00000098391	psmg3	chr3	42211330	42213029	+	protein_coding	proteasome (prosome, macropain) assembly chaperone 3 [Source:ZFIN;Acc:ZDB-GENE-040718-262]
ENSDARG00000099149	hs3st3b1a	chr3	44696546	44698245	+	protein_coding	heparan sulfate (glucosamine) 3-O-sulfotransferase 3B1a [Source:ZFIN;Acc:ZDB-GENE-070202-4]
ENSDARG00000077698	rsad1	chr3	49118488	49120187	+	protein_coding	radical S-adenosyl methionine domain containing 1 [Source:ZFIN;Acc:ZDB-GENE-030131-2508]
ENSDARG00000030560	helz	chr3	60796254	60797953	+	protein_coding	helicase with zinc finger [Source:ZFIN;Acc:ZDB-GENE-040426-2419]
ENSDARG00000019328	plxna4	chr4	15421498	15423197	-	protein_coding	plexin A4 [Source:ZFIN;Acc:ZDB-GENE-030131-4663]
ENSDARG00000024306	zbed4	chr4	27140210	27141909	-	protein_coding	zinc finger, BED-type containing 4 [Source:ZFIN;Acc:ZDB-GENE-041210-305]
ENSDARG00000101229	CR792418.3	chr4	38405264	38406963	-	protein_coding
ENSDARG00000102128	eps8	chr4	104232	105931	+	protein_coding	epidermal growth factor receptor pathway substrate 8 [Source:ZFIN;Acc:ZDB-GENE-040426-871]
ENSDARG00000084828	SNORA68	chr4	378817	380516	+	snoRNA	Small nucleolar RNA SNORA68 [Source:RFAM;Acc:RF00263]
ENSDARG00000045864	lmod2b	chr4	4110479	4112178	-	protein_coding	leiomodin 2 (cardiac) b [Source:ZFIN;Acc:ZDB-GENE-041210-356]
ENSDARG00000016691	cd9b	chr4	4247188	4248887	-	protein_coding	CD9 molecule b [Source:ZFIN;Acc:ZDB-GENE-040426-2768]
ENSDARG00000101363	ano2	chr4	4262789	4264488	+	protein_coding	anoctamin 2 [Source:ZFIN;Acc:ZDB-GENE-060503-62]
ENSDARG00000025824	dmtf1	chr4	9664152	9665851	-	protein_coding	cyclin D binding myb-like transcription factor 1 [Source:ZFIN;Acc:ZDB-GENE-040718-413]
ENSDARG00000045750	syt10	chr4	10888405	10890104	+	protein_coding	synaptotagmin X [Source:ZFIN;Acc:ZDB-GENE-041210-297]
ENSDARG00000032765	net1	chr4	11595154	11596853	-	protein_coding	neuroepithelial cell transforming 1 [Source:ZFIN;Acc:ZDB-GENE-041121-18]
ENSDARG00000025576	mkln1	chr4	11723502	11725201	+	protein_coding	muskelin 1, intracellular mediator containing kelch motifs [Source:ZFIN;Acc:ZDB-GENE-030131-3942]
ENSDARG00000041665	mkrn1	chr4	12304258	12305957	+	protein_coding	makorin, ring finger protein, 1 [Source:ZFIN;Acc:ZDB-GENE-020213-1]
ENSDARG00000022165	mgst1.2	chr4	12726465	12728164	-	protein_coding	microsomal glutathione S-transferase 1.2 [Source:ZFIN;Acc:ZDB-GENE-040704-59]
ENSDARG00000053127	helb	chr4	12782134	12783833	-	protein_coding	helicase (DNA) B [Source:ZFIN;Acc:ZDB-GENE-030729-16]
ENSDARG00000004794	ccdc146	chr4	20455050	20456749	+	protein_coding	coiled-coil domain containing 146 [Source:ZFIN;Acc:ZDB-GENE-041210-217]
ENSDARG00000005476	nav3	chr4	21232453	21234152	+	protein_coding	neuron navigator 3 [Source:ZFIN;Acc:ZDB-GENE-021205-1]
ENSDARG00000033443	mdm2	chr4	23403213	23404912	+	protein_coding	MDM2 oncogene, E3 ubiquitin protein ligase [Source:ZFIN;Acc:ZDB-GENE-990415-153]
ENSDARG00000001953	pfkfb3	chr4	25489598	25491297	-	protein_coding	6-phosphofructo-2-kinase/fructose-2,6-biphosphatase 3 [Source:ZFIN;Acc:ZDB-GENE-040426-2724]
ENSDARG00000013596	brd1a	chr4	27139623	27141322	+	protein_coding	bromodomain containing 1a [Source:ZFIN;Acc:ZDB-GENE-041008-168]
ENSDARG00000104762	BX530097.1	chr4	29774257	29775956	+	protein_coding
ENSDARG00000098177	si:dkey-28i19.3	chr4	33979499	33981198	+	protein_coding	si:dkey-28i19.3 [Source:ZFIN;Acc:ZDB-GENE-110913-17]
ENSDARG00000104964	znf1093	chr4	37859636	37861335	-	protein_coding	zinc finger protein 1093 [Source:ZFIN;Acc:ZDB-GENE-110914-12]
ENSDARG00000090192	si:dkey-16p6.1	chr4	43948708	43950407	+	protein_coding	si:dkey-16p6.1 [Source:ZFIN;Acc:ZDB-GENE-081103-43]
ENSDARG00000096046	BX649307.1	chr4	44089495	44091194	+	antisense
ENSDARG00000094612	si:dkey-262g12.3	chr4	72145359	72147058	-	protein_coding	si:dkey-262g12.3 [Source:ZFIN;Acc:ZDB-GENE-060503-255]
ENSDARG00000094551	BX855614.1	chr4	72164904	72166603	-	protein_coding
ENSDARG00000078014	pacsin2	chr4	76558699	76560398	+	protein_coding	protein kinase C and casein kinase substrate in neurons 2 [Source:ZFIN;Acc:ZDB-GENE-040426-2596]
ENSDARG00000035390	tnpo1	chr5	34652604	34654303	-	protein_coding	transportin 1 [Source:ZFIN;Acc:ZDB-GENE-080819-1]
ENSDARG00000016710	rchy1	chr5	8641358	8643057	+	protein_coding	ring finger and CHY zinc finger domain containing 1 [Source:ZFIN;Acc:ZDB-GENE-040801-73]
ENSDARG00000091624	zgc:172315	chr5	8876138	8877837	+	protein_coding	zgc:172315 [Source:ZFIN;Acc:ZDB-GENE-080220-7]
ENSDARG00000032039	mxd1	chr5	13266235	13267934	-	protein_coding	MAX dimerization protein 1 [Source:ZFIN;Acc:ZDB-GENE-060526-246]
ENSDARG00000061641	ankrd34bb	chr5	25554425	25556124	+	protein_coding	ankyrin repeat domain 34Bb [Source:ZFIN;Acc:ZDB-GENE-060526-101]
ENSDARG00000035468	slc25a25b	chr5	31189347	31191046	+	protein_coding	solute carrier family 25 (mitochondrial carrier; phosphate carrier), member 25b [Source:ZFIN;Acc:ZDB-GENE-060526-340]
ENSDARG00000053956	sptbn2	chr5	37047552	37049251	+	protein_coding	spectrin, beta, non-erythrocytic 2 [Source:ZFIN;Acc:ZDB-GENE-030131-787]
ENSDARG00000102320	mob1a	chr5	68943750	68945449	-	protein_coding	MOB kinase activator 1A [Source:ZFIN;Acc:ZDB-GENE-030131-6506]
ENSDARG00000090654	gak	chr5	9035804	9037503	-	protein_coding	cyclin G associated kinase [Source:ZFIN;Acc:ZDB-GENE-041210-358]
ENSDARG00000073808	WDR31	chr5	9497402	9499101	-	protein_coding	si:ch73-266o15.4 [Source:ZFIN;Acc:ZDB-GENE-070705-229]
ENSDARG00000061784	arhgap25	chr5	20668913	20670612	+	protein_coding	Rho GTPase activating protein 25 [Source:ZFIN;Acc:ZDB-GENE-060526-210]
ENSDARG00000057855	mrps31	chr5	23650065	23651764	-	protein_coding	mitochondrial ribosomal protein S31 [Source:ZFIN;Acc:ZDB-GENE-030131-3715]
ENSDARG00000062271	slc25a15b	chr5	23650869	23652568	+	protein_coding	solute carrier family 25 (mitochondrial carrier; ornithine transporter) member 15b [Source:ZFIN;Acc:ZDB-GENE-060526-35]
ENSDARG00000078807	zgc:193538	chr5	24579084	24580783	+	protein_coding	zgc:193538 [Source:ZFIN;Acc:ZDB-GENE-041111-206]
ENSDARG00000026726	anxa1a	chr5	24979048	24980747	-	protein_coding	annexin A1a [Source:ZFIN;Acc:ZDB-GENE-030131-6664]
ENSDARG00000035514	adam28	chr5	27292380	27294079	+	protein_coding	ADAM metallopeptidase domain 28 [Source:ZFIN;Acc:ZDB-GENE-060929-532]
ENSDARG00000002771	SLC4A5 (1 of many)	chr5	27502346	27504045	-	protein_coding	si:ch211-48m9.1 [Source:ZFIN;Acc:ZDB-GENE-060531-64]
ENSDARG00000078603	myo1hb	chr5	31358300	31359999	+	protein_coding	myosin IHb [Source:ZFIN;Acc:ZDB-GENE-070705-355]
ENSDARG00000103200	gpr107	chr5	31889444	31891143	-	protein_coding	G protein-coupled receptor 107 [Source:ZFIN;Acc:ZDB-GENE-061103-130]
ENSDARG00000007429	ndor1	chr5	31888935	31890634	+	protein_coding	NADPH dependent diflavin oxidoreductase 1 [Source:ZFIN;Acc:ZDB-GENE-040426-1555]
ENSDARG00000035400	btf3	chr5	34397278	34398977	-	protein_coding	basic transcription factor 3 [Source:ZFIN;Acc:ZDB-GENE-030131-8731]
ENSDARG00000028401	rhogc	chr5	35997260	35998959	-	protein_coding	ras homolog gene family, member Gc [Source:ZFIN;Acc:ZDB-GENE-030131-3402]
ENSDARG00000009939	micu2	chr5	35997453	35999152	+	protein_coding	mitochondrial calcium uptake 2 [Source:ZFIN;Acc:ZDB-GENE-030131-3374]
ENSDARG00000035329	capns1a	chr5	36059404	36061103	+	protein_coding	calpain, small subunit 1 a [Source:ZFIN;Acc:ZDB-GENE-030113-3]
ENSDARG00000060319	scn4bb	chr5	37335269	37336968	-	protein_coding	sodium channel, voltage-gated, type IV, beta b [Source:ZFIN;Acc:ZDB-GENE-031116-71]
ENSDARG00000031336	hsd20b2	chr5	37599153	37600852	+	protein_coding	hydroxysteroid (20-beta) dehydrogenase 2 [Source:ZFIN;Acc:ZDB-GENE-030804-21]
ENSDARG00000091972	si:dkey-58f10.7	chr5	38125200	38126899	+	protein_coding	si:dkey-58f10.7 [Source:ZFIN;Acc:ZDB-GENE-060526-321]
ENSDARG00000076830	si:dkey-65b12.6	chr5	41231294	41232993	-	protein_coding	si:dkey-65b12.6 [Source:ZFIN;Acc:ZDB-GENE-060526-329]
ENSDARG00000102777	thbs4a	chr5	51261485	51263184	+	protein_coding	thrombospondin 4a [Source:ZFIN;Acc:ZDB-GENE-080215-11]
ENSDARG00000074120	usp2b	chr5	62415642	62417341	-	protein_coding	ubiquitin specific peptidase 2b [Source:ZFIN;Acc:ZDB-GENE-100208-2]
ENSDARG00000099930	col27a1b	chr5	64573064	64574763	-	protein_coding	collagen, type XXVII, alpha 1b [Source:ZFIN;Acc:ZDB-GENE-100119-2]
ENSDARG00000067563	kiss1rb	chr5	68776235	68777934	-	protein_coding	KISS1 receptor b [Source:ZFIN;Acc:ZDB-GENE-060526-54]
ENSDARG00000094605	si:ch211-154e10.1	chr5	69245196	69246895	+	protein_coding	si:ch211-154e10.1 [Source:ZFIN;Acc:ZDB-GENE-081104-136]
ENSDARG00000099908	MTFP1	chr5	71592268	71593967	-	protein_coding	mitochondrial fission process 1 [Source:HGNC Symbol;Acc:HGNC:26945]
ENSDARG00000102657	lman2la	chr5	71591844	71593543	+	protein_coding	lectin, mannose-binding 2-like a [Source:ZFIN;Acc:ZDB-GENE-040715-4]
ENSDARG00000018782	kdm4aa	chr6	3119143	3120842	+	protein_coding	lysine (K)-specific demethylase 4A, genome duplicate a [Source:ZFIN;Acc:ZDB-GENE-110609-4]
ENSDARG00000104353	nop58	chr6	9459556	9461255	-	protein_coding	NOP58 ribonucleoprotein homolog (yeast) [Source:ZFIN;Acc:ZDB-GENE-040426-2140]
ENSDARG00000098726	rptor	chr6	17549621	17551320	-	protein_coding	regulatory associated protein of MTOR, complex 1 [Source:ZFIN;Acc:ZDB-GENE-130530-685]
ENSDARG00000027963	camkva	chr6	42546760	42548459	+	protein_coding	CaM kinase-like vesicle-associated a [Source:ZFIN;Acc:ZDB-GENE-100819-2]
ENSDARG00000077073	tanc1a	chr6	11812337	11814036	-	protein_coding	tetratricopeptide repeat, ankyrin repeat and coiled-coil containing 1a [Source:ZFIN;Acc:ZDB-GENE-130530-819]
ENSDARG00000104367	zgc:194469	chr6	12881170	12882869	-	protein_coding	zgc:194469 [Source:ZFIN;Acc:ZDB-GENE-081022-114]
ENSDARG00000061508	tgfbrap1	chr6	14916567	14918266	-	protein_coding	transforming growth factor, beta receptor associated protein 1 [Source:ZFIN;Acc:ZDB-GENE-070410-66]
ENSDARG00000052304	uqcrc1	chr6	20275332	20277031	+	protein_coding	ubiquinol-cytochrome c reductase core protein I [Source:ZFIN;Acc:ZDB-GENE-040426-1792]
ENSDARG00000099307	si:dkey-10p5.10	chr6	22048037	22049736	+	protein_coding	si:dkey-10p5.10 [Source:ZFIN;Acc:ZDB-GENE-120215-130]
ENSDARG00000101679	cfap52	chr6	23200819	23202518	-	protein_coding	cilia and flagella associated protein 52 [Source:ZFIN;Acc:ZDB-GENE-050522-296]
ENSDARG00000105112	ntn1a	chr6	23455137	23456836	-	protein_coding	netrin 1a [Source:ZFIN;Acc:ZDB-GENE-990415-169]
ENSDARG00000002210	stk25a	chr6	27066951	27068650	-	protein_coding	serine/threonine kinase 25a [Source:ZFIN;Acc:ZDB-GENE-041010-92]
ENSDARG00000010958	glmnb	chr6	28981261	28982960	-	protein_coding	glomulin, FKBP associated protein b [Source:ZFIN;Acc:ZDB-GENE-080723-14]
ENSDARG00000013561	pgm1	chr6	32038112	32039811	-	protein_coding	phosphoglucomutase 1 [Source:ZFIN;Acc:ZDB-GENE-040426-1245]
ENSDARG00000055737	ube3a	chr6	38774339	38776038	+	protein_coding	ubiquitin protein ligase E3A [Source:ZFIN;Acc:ZDB-GENE-041114-190]
ENSDARG00000026655	tspo	chr6	40585518	40587217	-	protein_coding	translocator protein [Source:ZFIN;Acc:ZDB-GENE-041010-125]
ENSDARG00000025397	srsf3a	chr6	41087722	41089421	-	protein_coding	serine/arginine-rich splicing factor 3a [Source:ZFIN;Acc:ZDB-GENE-030616-631]
ENSDARG00000028396	fkbp5	chr6	41097021	41098720	+	protein_coding	FK506 binding protein 5 [Source:ZFIN;Acc:ZDB-GENE-030616-630]
ENSDARG00000077473	mych	chr6	50450617	50452316	+	protein_coding	myelocytomatosis oncogene homolog [Source:ZFIN;Acc:ZDB-GENE-030219-51]
ENSDARG00000102101	si:ch73-174h16.5	chr7	39848969	39850668	-	protein_coding	si:ch73-174h16.5 [Source:ZFIN;Acc:ZDB-GENE-160728-123]
ENSDARG00000077162	nwd2	chr7	60745095	60746794	+	protein_coding	NACHT and WD repeat domain containing 2 [Source:ZFIN;Acc:ZDB-GENE-161213-1]
ENSDARG00000001431	actn3b	chr7	6813365	6815064	+	protein_coding	actinin alpha 3b [Source:ZFIN;Acc:ZDB-GENE-030131-2040]
ENSDARG00000090696	TMC3	chr7	11423144	11424843	-	protein_coding	si:dkey-15b23.3 [Source:ZFIN;Acc:ZDB-GENE-141216-304]
ENSDARG00000088087	kdm6ba	chr7	21484329	21486028	+	protein_coding	lysine (K)-specific demethylase 6B, a [Source:ZFIN;Acc:ZDB-GENE-091005-1]
ENSDARG00000079165	galr1b	chr7	34765094	34766793	-	protein_coding	galanin receptor 1b [Source:ZFIN;Acc:ZDB-GENE-140624-1]
ENSDARG00000074498	chd9	chr7	36279634	36281333	+	protein_coding	chromodomain helicase DNA binding protein 9 [Source:ZFIN;Acc:ZDB-GENE-030131-497]
ENSDARG00000035891	acana	chr7	48487598	48489297	+	protein_coding	aggrecan a [Source:ZFIN;Acc:ZDB-GENE-050208-221]
ENSDARG00000059751	abtb2a	chr7	48998425	49000124	+	protein_coding	ankyrin repeat and BTB (POZ) domain containing 2a [Source:ZFIN;Acc:ZDB-GENE-100422-13]
ENSDARG00000044812	TTC17	chr7	50076455	50078154	-	protein_coding	Tetratricopeptide repeat protein 17 [Source:UniProtKB/Swiss-Prot;Acc:E7F211]
ENSDARG00000037145	slc8a4b	chr7	59890422	59892121	+	protein_coding	solute carrier family 8 (sodium/calcium exchanger), member 4b [Source:ZFIN;Acc:ZDB-GENE-050809-103]
ENSDARG00000101079	HECTD4	chr7	72278224	72279923	-	protein_coding	HECT domain E3 ubiquitin protein ligase 4 [Source:HGNC Symbol;Acc:HGNC:26611]
ENSDARG00000091521	MAP3K11	chr7	508222	509921	-	protein_coding	si:cabz01078036.1 [Source:ZFIN;Acc:ZDB-GENE-160728-33]
ENSDARG00000036893	f13a1b	chr7	8069022	8070721	-	protein_coding	coagulation factor XIII, A1 polypeptide b [Source:ZFIN;Acc:ZDB-GENE-030131-9634]
ENSDARG00000058702	vax2	chr7	8635357	8637056	-	protein_coding	ventral anterior homeobox 2 [Source:ZFIN;Acc:ZDB-GENE-030904-8]
ENSDARG00000013360	sh3gl3a	chr7	12656192	12657891	-	protein_coding	SH3-domain GRB2-like 3a [Source:ZFIN;Acc:ZDB-GENE-070112-242]
ENSDARG00000057353	ehbp1l1a	chr7	17764282	17765981	+	protein_coding	EH domain binding protein 1-like 1a [Source:ZFIN;Acc:ZDB-GENE-080917-27]
ENSDARG00000103276	fcer1g	chr7	18790935	18792634	-	protein_coding	Fc fragment of IgE, high affinity I, receptor for; gamma polypeptide [Source:ZFIN;Acc:ZDB-GENE-061130-3]
ENSDARG00000036445	serpinh2	chr7	21005029	21006728	+	protein_coding	serine (or cysteine) peptidase inhibitor, clade H, member 2 [Source:ZFIN;Acc:ZDB-GENE-050417-12]
ENSDARG00000076443	si:dkey-183c6.8	chr7	23700141	23701840	-	protein_coding	si:dkey-183c6.8 [Source:ZFIN;Acc:ZDB-GENE-160728-23]
ENSDARG00000010596	slc7a6os	chr7	28342339	28344038	+	protein_coding	solute carrier family 7, member 6 opposite strand [Source:ZFIN;Acc:ZDB-GENE-041114-32]
ENSDARG00000077506	tjp1a	chr7	30848115	30849814	+	protein_coding	tight junction protein 1a [Source:ZFIN;Acc:ZDB-GENE-031001-2]
ENSDARG00000036147	ano5b	chr7	32604203	32605902	-	protein_coding	anoctamin 5b [Source:ZFIN;Acc:ZDB-GENE-061215-108]
ENSDARG00000098439	nr1h3	chr7	34164044	34165743	-	protein_coding	nuclear receptor subfamily 1, group H, member 3 [Source:ZFIN;Acc:ZDB-GENE-050410-7]
ENSDARG00000001975	hsd11b2	chr7	34854698	34856397	-	protein_coding	hydroxysteroid (11-beta) dehydrogenase 2 [Source:ZFIN;Acc:ZDB-GENE-030131-6030]
ENSDARG00000101076	irx3a	chr7	35768531	35770230	+	protein_coding	iroquois homeobox 3a [Source:ZFIN;Acc:ZDB-GENE-991119-5]
ENSDARG00000000861	scrib	chr7	40984044	40985743	+	protein_coding	scribbled planar cell polarity protein [Source:ZFIN;Acc:ZDB-GENE-030616-572]
ENSDARG00000102706	BX511128.3	chr7	44389899	44391598	+	lincRNA
ENSDARG00000028058	traf6	chr7	48465803	48467502	-	protein_coding	TNF receptor-associated factor 6 [Source:ZFIN;Acc:ZDB-GENE-030131-5735]
ENSDARG00000020473	hddc3	chr7	50120725	50122424	+	protein_coding	HD domain containing 3 [Source:ZFIN;Acc:ZDB-GENE-050417-377]
ENSDARG00000046013	rasl11a	chr7	51044722	51046421	-	protein_coding	RAS-like, family 11, member A [Source:ZFIN;Acc:ZDB-GENE-050417-384]
ENSDARG00000017794	sdr16c5b	chr7	58395777	58397476	+	protein_coding	short chain dehydrogenase/reductase family 16C, member 5b [Source:ZFIN;Acc:ZDB-GENE-040426-2861]
ENSDARG00000089957	lgi2a	chr7	71192689	71194388	-	protein_coding	leucine-rich repeat LGI family, member 2a [Source:ZFIN;Acc:ZDB-GENE-060217-2]
ENSDARG00000086345	cux2b	chr8	4270568	4272267	-	protein_coding	cut-like homeobox 2b [Source:ZFIN;Acc:ZDB-GENE-081104-176]
ENSDARG00000010408	igsf9b	chr8	4903844	4905543	-	protein_coding	immunoglobulin superfamily, member 9b [Source:ZFIN;Acc:ZDB-GENE-060810-28]
ENSDARG00000098299	FQ377654.1	chr8	7857524	7859223	+	protein_coding
ENSDARG00000023546	kcnn1b	chr8	13277400	13279099	-	protein_coding	potassium intermediate/small conductance calcium-activated channel, subfamily N, member 1b [Source:ZFIN;Acc:ZDB-GENE-060503-397]
ENSDARG00000075188	adamts10	chr8	20348466	20350165	-	protein_coding	ADAM metallopeptidase with thrombospondin type 1 motif, 10 [Source:ZFIN;Acc:ZDB-GENE-081104-414]
ENSDARG00000007369	tcf7l1b	chr8	52243394	52245093	-	protein_coding	transcription factor 7-like 1b (T-cell specific, HMG-box) [Source:ZFIN;Acc:ZDB-GENE-991110-10]
ENSDARG00000100247	FUT9 (1 of many)	chr8	3366272	3367971	+	protein_coding	fucosyltransferase 9 [Source:HGNC Symbol;Acc:HGNC:4020]
ENSDARG00000087187	grip2a	chr8	7163255	7164954	-	protein_coding	glutamate receptor interacting protein 2a [Source:ZFIN;Acc:ZDB-GENE-081104-132]
ENSDARG00000042122	acot11b	chr8	17961821	17963520	-	protein_coding	acyl-CoA thioesterase 11b [Source:ZFIN;Acc:ZDB-GENE-051127-37]
ENSDARG00000062063	tab3	chr8	18518346	18520045	+	protein_coding	TGF-beta activated kinase 1/MAP3K7 binding protein 3 [Source:ZFIN;Acc:ZDB-GENE-060503-408]
ENSDARG00000058133	foxd2	chr8	19640783	19642482	+	protein_coding	forkhead box D2 [Source:ZFIN;Acc:ZDB-GENE-980605-6]
ENSDARG00000077907	si:dkey-183p4.10	chr8	25338754	25340453	+	protein_coding	si:dkey-183p4.10 [Source:ZFIN;Acc:ZDB-GENE-081104-337]
ENSDARG00000055753	suv39h1b	chr8	25735960	25737659	-	protein_coding	suppressor of variegation 3-9 homolog 1b [Source:ZFIN;Acc:ZDB-GENE-030131-5105]
ENSDARG00000006900	impdh2	chr8	26038952	26040651	+	protein_coding	IMP (inosine 5'-monophosphate) dehydrogenase 2 [Source:ZFIN;Acc:ZDB-GENE-030114-5]
ENSDARG00000097292	slc26a6	chr8	26239926	26241625	+	protein_coding	solute carrier family 26, member 6 [Source:ZFIN;Acc:ZDB-GENE-081105-83]
ENSDARG00000077536	snrnp200	chr8	31032447	31034146	-	protein_coding	small nuclear ribonucleoprotein 200 (U5) [Source:ZFIN;Acc:ZDB-GENE-081105-64]
ENSDARG00000020926	creb3l3l	chr8	31370254	31371953	-	protein_coding	cAMP responsive element binding protein 3-like 3 like [Source:ZFIN;Acc:ZDB-GENE-040426-2942]
ENSDARG00000013615	pbx3b	chr8	33937786	33939485	-	protein_coding	pre-B-cell leukemia homeobox 3b [Source:ZFIN;Acc:ZDB-GENE-000405-3]
ENSDARG00000046124	rab11fip1a	chr8	37989151	37990850	-	protein_coding	RAB11 family interacting protein 1 (class I) a [Source:ZFIN;Acc:ZDB-GENE-051113-116]
ENSDARG00000059629	asphd2	chr8	39950620	39952319	-	protein_coding	aspartate beta-hydroxylase domain containing 2 [Source:ZFIN;Acc:ZDB-GENE-061103-142]
ENSDARG00000041750	ccdc92	chr8	43113349	43115048	-	protein_coding	coiled-coil domain containing 92 [Source:ZFIN;Acc:ZDB-GENE-051113-120]
ENSDARG00000095351	CU914776.2	chr8	44351098	44352797	-	processed_transcript
ENSDARG00000032535	praf2	chr8	44910618	44912317	-	protein_coding	PRA1 domain family, member 2 [Source:ZFIN;Acc:ZDB-GENE-050417-190]
ENSDARG00000034270	ogdha	chr8	45826976	45828675	-	protein_coding	oxoglutarate (alpha-ketoglutarate) dehydrogenase a (lipoamide) [Source:ZFIN;Acc:ZDB-GENE-030131-2143]
ENSDARG00000087601	gpr153	chr8	46709613	46711312	-	protein_coding	G protein-coupled receptor 153 [Source:ZFIN;Acc:ZDB-GENE-050823-7]
ENSDARG00000070145	magi1a	chr8	53658481	53660180	+	protein_coding	membrane associated guanylate kinase, WW and PDZ domain containing 1a [Source:ZFIN;Acc:ZDB-GENE-081105-13]
ENSDARG00000098349	hdac4	chr9	46272127	46273826	-	protein_coding	histone deacetylase 4 [Source:ZFIN;Acc:ZDB-GENE-061013-95]
ENSDARG00000006892	myo3b	chr9	3862958	3864657	-	protein_coding	myosin IIIB [Source:ZFIN;Acc:ZDB-GENE-070706-2]
ENSDARG00000062696	dgkg	chr9	22682020	22683719	+	protein_coding	diacylglycerol kinase, gamma [Source:ZFIN;Acc:ZDB-GENE-081105-39]
ENSDARG00000059809	caska	chr9	33799587	33801286	-	protein_coding	calcium/calmodulin-dependent serine protein kinase a [Source:ZFIN;Acc:ZDB-GENE-020802-4]
ENSDARG00000006065	znf385b	chr9	43736342	43738041	-	protein_coding	zinc finger protein 385B [Source:ZFIN;Acc:ZDB-GENE-030616-154]
ENSDARG00000104110	col4a2	chr9	8871988	8873687	+	protein_coding	collagen, type IV, alpha 2 [Source:ZFIN;Acc:ZDB-GENE-070725-3]
ENSDARG00000075111	als2a	chr9	13655951	13657650	+	protein_coding	amyotrophic lateral sclerosis 2a (juvenile) [Source:ZFIN;Acc:ZDB-GENE-070402-2]
ENSDARG00000024846	cops8	chr9	24083341	24085040	+	protein_coding	COP9 signalosome subunit 8 [Source:ZFIN;Acc:ZDB-GENE-040426-982]
ENSDARG00000056410	fdx1	chr9	29708449	29710148	+	protein_coding	ferredoxin 1 [Source:ZFIN;Acc:ZDB-GENE-071015-2]
ENSDARG00000062156	abi3bpa	chr9	30334135	30335834	-	protein_coding	ABI family, member 3 (NESH) binding protein a [Source:ZFIN;Acc:ZDB-GENE-070912-325]
ENSDARG00000095912	si:dkey-229b18.3	chr9	30683782	30685481	-	protein_coding	si:dkey-229b18.3 [Source:ZFIN;Acc:ZDB-GENE-030131-6870]
ENSDARG00000014427	mxe	chr9	33028971	33030670	-	protein_coding	myxovirus (influenza virus) resistance E [Source:ZFIN;Acc:ZDB-GENE-030131-9609]
ENSDARG00000020573	ddx3a	chr9	33528064	33529763	+	protein_coding	DEAD (Asp-Glu-Ala-Asp) box helicase 3a [Source:ZFIN;Acc:ZDB-GENE-030131-1565]
ENSDARG00000093418	si:dkey-216e24.9	chr9	33610923	33612622	+	protein_coding	si:dkey-216e24.9 [Source:ZFIN;Acc:ZDB-GENE-070912-441]
ENSDARG00000094012	si:dkey-192g7.3	chr9	35268884	35270583	+	protein_coding	si:dkey-192g7.3 [Source:ZFIN;Acc:ZDB-GENE-070912-411]
ENSDARG00000014806	hacd2	chr9	38232945	38234644	-	protein_coding	3-hydroxyacyl-CoA dehydratase 2 [Source:ZFIN;Acc:ZDB-GENE-030131-6053]
ENSDARG00000025348	igfbp5b	chr9	47041501	47043200	-	protein_coding	insulin-like growth factor binding protein 5b [Source:ZFIN;Acc:ZDB-GENE-040319-2]
ENSDARG00000098790	sowahca	chr9	56441213	56442912	-	protein_coding	sosondowah ankyrin repeat domain family Ca [Source:ZFIN;Acc:ZDB-GENE-081104-106]
ENSDARG00000067824	cntnap3	chr10	2232656	2234355	+	protein_coding	contactin associated protein-like 3 [Source:ZFIN;Acc:ZDB-GENE-091113-51]
ENSDARG00000058946	CU856539.2	chr10	2571543	2573242	+	protein_coding
ENSDARG00000069446	dbh	chr10	10620395	10622094	-	protein_coding	dopamine beta-hydroxylase (dopamine beta-monooxygenase) [Source:ZFIN;Acc:ZDB-GENE-990621-3]
ENSDARG00000017880	kcnip3b	chr10	20712055	20713754	-	protein_coding	Kv channel interacting protein 3b, calsenilin [Source:ZFIN;Acc:ZDB-GENE-040426-1752]
ENSDARG00000078691	gigyf1	chr10	22536852	22538551	+	protein_coding	GRB10 interacting GYF protein 1 [Source:ZFIN;Acc:ZDB-GENE-091204-310]
ENSDARG00000099323	dlg2	chr10	29385815	29387514	+	protein_coding	discs, large homolog 2 (Drosophila) [Source:ZFIN;Acc:ZDB-GENE-050221-3]
ENSDARG00000029764	mef2ca	chr10	43826788	43828487	-	protein_coding	myocyte enhancer factor 2ca [Source:ZFIN;Acc:ZDB-GENE-980526-253]
ENSDARG00000086902	DIRAS2	chr10	5596016	5597715	+	protein_coding	DIRAS family GTPase 2 [Source:HGNC Symbol;Acc:HGNC:19323]
ENSDARG00000063050	rc3h2	chr10	9763117	9764816	+	protein_coding	ring finger and CCCH-type domains 2 [Source:ZFIN;Acc:ZDB-GENE-060503-694]
ENSDARG00000044281	erbb2ip	chr10	15572696	15574395	+	protein_coding	erbb2 interacting protein [Source:ZFIN;Acc:ZDB-GENE-061103-403]
ENSDARG00000073695	mamdc2b	chr10	15714544	15716243	-	protein_coding	MAM domain containing 2b [Source:ZFIN;Acc:ZDB-GENE-091117-16]
ENSDARG00000078056	RNF208	chr10	17145524	17147223	-	protein_coding	ring finger protein 208 [Source:HGNC Symbol;Acc:HGNC:25420]
ENSDARG00000069377	si:dkey-242g16.2	chr10	18031146	18032845	-	protein_coding	si:dkey-242g16.2 [Source:ZFIN;Acc:ZDB-GENE-030131-8324]
ENSDARG00000057676	golga7	chr10	20405273	20406972	+	protein_coding	golgin A7 [Source:ZFIN;Acc:ZDB-GENE-040625-142]
ENSDARG00000073753	tacc1	chr10	20519856	20521555	-	protein_coding	transforming, acidic coiled-coil containing protein 1 [Source:ZFIN;Acc:ZDB-GENE-090521-5]
ENSDARG00000044091	pitpnab	chr10	24373856	24375555	-	protein_coding	phosphatidylinositol transfer protein, alpha b [Source:ZFIN;Acc:ZDB-GENE-110408-51]
ENSDARG00000057021	vps36	chr10	24697821	24699520	+	protein_coding	vacuolar protein sorting 36 homolog (S. cerevisiae) [Source:ZFIN;Acc:ZDB-GENE-030131-7753]
ENSDARG00000075273	thsd1	chr10	24709039	24710738	+	protein_coding	thrombospondin, type I, domain containing 1 [Source:ZFIN;Acc:ZDB-GENE-100105-3]
ENSDARG00000056985	tpte	chr10	24719581	24721280	+	protein_coding	transmembrane phosphatase with tensin homology [Source:ZFIN;Acc:ZDB-GENE-030131-5503]
ENSDARG00000095400	si:ch73-52f15.5	chr10	26704261	26705960	+	protein_coding	si:ch73-52f15.5 [Source:ZFIN;Acc:ZDB-GENE-091204-341]
ENSDARG00000014506	tmem126a	chr10	29385883	29387582	-	protein_coding	transmembrane protein 126A [Source:ZFIN;Acc:ZDB-GENE-040426-1770]
ENSDARG00000036338	vps11	chr10	29882017	29883716	-	protein_coding	vacuolar protein sorting 11 [Source:ZFIN;Acc:ZDB-GENE-050731-5]
ENSDARG00000068992	hspa8	chr10	29961605	29963304	+	protein_coding	heat shock protein 8 [Source:ZFIN;Acc:ZDB-GENE-990415-92]
ENSDARG00000082105	SNORD14	chr10	29962731	29964430	+	snoRNA	Small nucleolar RNA SNORD14 [Source:RFAM;Acc:RF00016]
ENSDARG00000034825	uspl1	chr10	36494034	36495733	+	protein_coding	ubiquitin specific peptidase like 1 [Source:ZFIN;Acc:ZDB-GENE-040930-7]
ENSDARG00000093366	acer3	chr10	38581237	38582936	+	protein_coding	alkaline ceramidase 3 [Source:ZFIN;Acc:ZDB-GENE-091204-155]
ENSDARG00000093535	BX005309.1	chr10	42157607	42159306	-	processed_transcript
ENSDARG00000060847	setd1ba	chr10	42156990	42158689	+	protein_coding	SET domain containing 1B, a [Source:ZFIN;Acc:ZDB-GENE-050309-289]
ENSDARG00000009733	kif21b	chr11	2784575	2786274	+	protein_coding	kinesin family member 21B [Source:ZFIN;Acc:ZDB-GENE-130530-537]
ENSDARG00000070846	dazap1	chr11	5882754	5884453	+	protein_coding	DAZ associated protein 1 [Source:ZFIN;Acc:ZDB-GENE-070212-1]
ENSDARG00000010096	slc1a6	chr11	6153887	6155586	+	protein_coding	solute carrier family 1 (high affinity aspartate/glutamate transporter), member 6 [Source:ZFIN;Acc:ZDB-GENE-071004-45]
ENSDARG00000037593	prickle2b	chr11	19206874	19208573	+	protein_coding	prickle homolog 2b [Source:ZFIN;Acc:ZDB-GENE-030724-6]
ENSDARG00000105178	erc2	chr11	37158003	37159702	-	protein_coding	ELKS/RAB6-interacting/CAST family member 2 [Source:ZFIN;Acc:ZDB-GENE-130530-700]
ENSDARG00000011407	col2a1b	chr11	52385	54084	-	protein_coding	collagen, type II, alpha 1b [Source:ZFIN;Acc:ZDB-GENE-050302-9]
ENSDARG00000101413	dusp7	chr11	131183	132882	+	protein_coding	dual specificity phosphatase 7 [Source:ZFIN;Acc:ZDB-GENE-030131-5457]
ENSDARG00000077934	tegt	chr11	205595	207294	-	protein_coding	testis enhanced gene transcript (BAX inhibitor 1) [Source:ZFIN;Acc:ZDB-GENE-030826-10]
ENSDARG00000018260	bmp7a	chr11	7137502	7139201	-	protein_coding	bone morphogenetic protein 7a [Source:ZFIN;Acc:ZDB-GENE-000208-25]
ENSDARG00000097452	CU929070.1	chr11	7138164	7139863	+	processed_transcript
ENSDARG00000087133	nlgn1	chr11	9823610	9825309	-	protein_coding	neuroligin 1 [Source:ZFIN;Acc:ZDB-GENE-090918-1]
ENSDARG00000077474	pla2r1	chr11	11036542	11038241	+	protein_coding	phospholipase A2 receptor 1 [Source:ZFIN;Acc:ZDB-GENE-120323-1]
ENSDARG00000100968	si:ch211-1a19.3	chr11	13570947	13572646	+	protein_coding	si:ch211-1a19.3 [Source:ZFIN;Acc:ZDB-GENE-141216-322]
ENSDARG00000098453	pank4	chr11	15754848	15756547	+	protein_coding	pantothenate kinase 4 [Source:ZFIN;Acc:ZDB-GENE-040426-1592]
ENSDARG00000010794	tfeb	chr11	22142911	22144610	-	protein_coding	transcription factor EB [Source:ZFIN;Acc:ZDB-GENE-090807-3]
ENSDARG00000020544	rem1	chr11	24074814	24076513	+	protein_coding	RAS (RAD and GEM)-like GTP-binding 1 [Source:ZFIN;Acc:ZDB-GENE-040317-1]
ENSDARG00000008034	skib	chr11	25591191	25592890	-	protein_coding	v-ski avian sarcoma viral oncogene homolog b [Source:ZFIN;Acc:ZDB-GENE-990715-10]
ENSDARG00000105437	BX601648.2	chr11	27489814	27491513	+	antisense
ENSDARG00000076622	atp13a3	chr11	33884574	33886273	-	protein_coding	ATPase type 13A3 [Source:ZFIN;Acc:ZDB-GENE-120521-1]
ENSDARG00000075456	pik3ca	chr11	34259951	34261650	-	protein_coding	phosphatidylinositol-4,5-bisphosphate 3-kinase, catalytic subunit alpha [Source:ZFIN;Acc:ZDB-GENE-130409-1]
ENSDARG00000105463	CR352285.4	chr11	37030693	37032392	-	antisense
ENSDARG00000038207	aldh4a1	chr11	41322817	41324516	+	protein_coding	aldehyde dehydrogenase 4 family, member A1 [Source:ZFIN;Acc:ZDB-GENE-040426-1179]
ENSDARG00000042458	rfc4	chr11	45051434	45053133	-	protein_coding	replication factor C (activator 1) 4 [Source:ZFIN;Acc:ZDB-GENE-040824-3]
ENSDARG00000094504	plekha1b	chr12	11555617	11557316	-	protein_coding	pleckstrin homology domain containing, family A (phosphoinositide binding specific) member 1b [Source:ZFIN;Acc:ZDB-GENE-110408-54]
ENSDARG00000078425	oat	chr12	46942889	46944588	+	protein_coding	ornithine aminotransferase [Source:ZFIN;Acc:ZDB-GENE-110411-148]
ENSDARG00000073771	tbc1d12b	chr12	5420780	5422479	-	protein_coding	TBC1 domain family, member 12b [Source:ZFIN;Acc:ZDB-GENE-121214-108]
ENSDARG00000040765	drd6b	chr12	5421986	5423685	+	protein_coding	dopamine receptor D6b [Source:ZFIN;Acc:ZDB-GENE-121214-145]
ENSDARG00000071691	uqcrc2b	chr12	10403619	10405318	-	protein_coding	ubiquinol-cytochrome c reductase core protein IIb [Source:ZFIN;Acc:ZDB-GENE-030131-1269]
ENSDARG00000035458	atp2a1l	chr12	13204380	13206079	+	protein_coding	ATPase, Ca++ transporting, cardiac muscle, fast twitch 1 like [Source:ZFIN;Acc:ZDB-GENE-041229-2]
ENSDARG00000055652	aclyb	chr12	14011987	14013686	-	protein_coding	ATP citrate lyase b [Source:ZFIN;Acc:ZDB-GENE-090909-2]
ENSDARG00000052388	pcgf5b	chr12	16367748	16369447	-	protein_coding	polycomb group ring finger 5b [Source:ZFIN;Acc:ZDB-GENE-060512-34]
ENSDARG00000089885	slc16a12b	chr12	16844340	16846039	+	protein_coding	solute carrier family 16, member 12b [Source:ZFIN;Acc:ZDB-GENE-050522-80]
ENSDARG00000039117	tefa	chr12	19031104	19032803	-	protein_coding	thyrotrophic embryonic factor a [Source:ZFIN;Acc:ZDB-GENE-990415-264]
ENSDARG00000054907	cox7a3	chr12	25110017	25111716	-	protein_coding	cytochrome c oxidase subunit VIIa polypeptide 3 [Source:ZFIN;Acc:ZDB-GENE-030131-7691]
ENSDARG00000053929	opn4b	chr12	26061542	26063241	-	protein_coding	opsin 4b [Source:ZFIN;Acc:ZDB-GENE-080415-3]
ENSDARG00000001498	skap1	chr12	27064082	27065781	+	protein_coding	src kinase associated phosphoprotein 1 [Source:ZFIN;Acc:ZDB-GENE-090721-1]
ENSDARG00000077297	nbr1a	chr12	27126132	27127831	+	protein_coding	neighbor of brca1 gene 1a [Source:ZFIN;Acc:ZDB-GENE-030131-9112]
ENSDARG00000020876	pdk2a	chr12	28455888	28457587	-	protein_coding	pyruvate dehydrogenase kinase, isozyme 2a [Source:ZFIN;Acc:ZDB-GENE-120910-1]
ENSDARG00000021488	cyth1b	chr12	34077504	34079203	+	protein_coding	cytohesin 1b [Source:ZFIN;Acc:ZDB-GENE-030131-4311]
ENSDARG00000095947	adkb	chr12	46824709	46826408	+	protein_coding	adenosine kinase b [Source:ZFIN;Acc:ZDB-GENE-030131-948]
ENSDARG00000102279	zmiz1b	chr12	48829907	48831606	+	protein_coding	zinc finger, MIZ-type containing 1b [Source:ZFIN;Acc:ZDB-GENE-120206-3]
ENSDARG00000092659	ppp3r1a	chr13	968410	970109	+	protein_coding	protein phosphatase 3, regulatory subunit B, alpha a [Source:ZFIN;Acc:ZDB-GENE-081113-3]
ENSDARG00000104347	rtn4b	chr13	139792	141491	-	protein_coding	reticulon 4b [Source:ZFIN;Acc:ZDB-GENE-030710-2]
ENSDARG00000056829	CR559945.1	chr13	11667541	11669240	-	protein_coding
ENSDARG00000062790	CU639469.1	chr13	28688277	28689976	+	protein_coding
ENSDARG00000004979	elovl5	chr13	2259292	2260991	-	protein_coding	ELOVL fatty acid elongase 5 [Source:ZFIN;Acc:ZDB-GENE-040407-2]
ENSDARG00000062418	ttl	chr13	15797743	15799442	-	protein_coding	tubulin tyrosine ligase [Source:ZFIN;Acc:ZDB-GENE-060929-608]
ENSDARG00000069386	mtg1	chr13	21544284	21545983	+	protein_coding	mitochondrial ribosome-associated GTPase 1 [Source:ZFIN;Acc:ZDB-GENE-031110-2]
ENSDARG00000056206	camk2g2	chr13	22057778	22059477	+	protein_coding	calcium/calmodulin-dependent protein kinase (CaM kinase) II gamma 2 [Source:ZFIN;Acc:ZDB-GENE-070323-2]
ENSDARG00000061437	inpp5f	chr13	25379431	25381130	+	protein_coding	inositol polyphosphate-5-phosphatase F [Source:ZFIN;Acc:ZDB-GENE-041111-194]
ENSDARG00000061352	bcl11aa	chr13	25714577	25716276	+	protein_coding	B-cell CLL/lymphoma 11Aa [Source:ZFIN;Acc:ZDB-GENE-060421-4643]
ENSDARG00000077265	wdr89	chr13	37348900	37350599	-	protein_coding	WD repeat domain 89 [Source:ZFIN;Acc:ZDB-GENE-090319-3]
ENSDARG00000059850	slc35f3b	chr13	39273878	39275577	-	protein_coding	solute carrier family 35, member F3b [Source:ZFIN;Acc:ZDB-GENE-090312-118]
ENSDARG00000078942	enox2	chr14	22873245	22874944	+	protein_coding	ecto-NOX disulfide-thiol exchanger 2 [Source:ZFIN;Acc:ZDB-GENE-140106-157]
ENSDARG00000001162	matr3l1.1	chr14	24781125	24782824	-	protein_coding	matrin 3-like 1.1 [Source:ZFIN;Acc:ZDB-GENE-030616-40]
ENSDARG00000015472	gpc4	chr14	30810635	30812334	-	protein_coding	glypican 4 [Source:ZFIN;Acc:ZDB-GENE-011119-1]
ENSDARG00000077588	pdgfc	chr14	35513134	35514833	-	protein_coding	platelet derived growth factor c [Source:ZFIN;Acc:ZDB-GENE-071217-2]
ENSDARG00000029064	uqcrq	chr14	38537906	38539605	-	protein_coding	ubiquinol-cytochrome c reductase, complex III subunit VII [Source:ZFIN;Acc:ZDB-GENE-040718-199]
ENSDARG00000076060	diaph2	chr14	38889218	38890917	+	protein_coding	diaphanous-related formin 2 [Source:ZFIN;Acc:ZDB-GENE-090115-1]
ENSDARG00000038508	chrnb3b	chr14	41153559	41155258	+	protein_coding	cholinergic receptor, nicotinic, beta 3b (neuronal) [Source:ZFIN;Acc:ZDB-GENE-030102-4]
ENSDARG00000101794	atp6v0e1	chr14	51853958	51855657	+	protein_coding	ATPase, H+ transporting, lysosomal V0 subunit e1 [Source:ZFIN;Acc:ZDB-GENE-041010-133]
ENSDARG00000089505	bod1l1	chr14	31414	33113	-	protein_coding	biorientation of chromosomes in cell division 1-like 1 [Source:ZFIN;Acc:ZDB-GENE-111028-1]
ENSDARG00000103290	CABZ01085924.1	chr14	633236	634935	+	protein_coding
ENSDARG00000041607	eif4ebp3l	chr14	6672404	6674103	-	protein_coding	eukaryotic translation initiation factor 4E binding protein 3, like [Source:ZFIN;Acc:ZDB-GENE-030826-26]
ENSDARG00000071868	znf711	chr14	11714440	11716139	-	protein_coding	zinc finger protein 711 [Source:ZFIN;Acc:ZDB-GENE-081107-49]
ENSDARG00000037514	hdac3	chr14	11882322	11884021	+	protein_coding	histone deacetylase 3 [Source:ZFIN;Acc:ZDB-GENE-040426-847]
ENSDARG00000037495	rtn4rl2b	chr14	16891215	16892914	+	protein_coding	reticulon 4 receptor-like 2b [Source:ZFIN;Acc:ZDB-GENE-040310-2]
ENSDARG00000079586	gabrb2	chr14	21970534	21972233	+	protein_coding	gamma-aminobutyric acid (GABA) A receptor, beta 2 [Source:ZFIN;Acc:ZDB-GENE-030131-8196]
ENSDARG00000056830	si:ch211-107m4.1	chr14	22198160	22199859	-	protein_coding	si:ch211-107m4.1 [Source:ZFIN;Acc:ZDB-GENE-081107-3]
ENSDARG00000076547	CT956101.1	chr14	23219364	23221063	+	protein_coding
ENSDARG00000011618	slc26a2	chr14	25155059	25156758	-	protein_coding	solute carrier family 26 (anion exchanger), member 2 [Source:ZFIN;Acc:ZDB-GENE-030717-3]
ENSDARG00000075666	tsc22d3	chr14	27703682	27705381	-	protein_coding	TSC22 domain family, member 3 [Source:ZFIN;Acc:ZDB-GENE-040426-1433]
ENSDARG00000053668	stag2b	chr14	28185461	28187160	+	protein_coding	stromal antigen 2b [Source:ZFIN;Acc:ZDB-GENE-030131-2785]
ENSDARG00000055752	npas4a	chr14	30302306	30304005	-	protein_coding	neuronal PAS domain protein 4a [Source:ZFIN;Acc:ZDB-GENE-060616-396]
ENSDARG00000008884	hprt1	chr14	31168107	31169806	+	protein_coding	hypoxanthine phosphoribosyltransferase 1 [Source:ZFIN;Acc:ZDB-GENE-040426-1918]
ENSDARG00000010553	mmgt1	chr14	31276221	31277920	-	protein_coding	membrane magnesium transporter 1 [Source:ZFIN;Acc:ZDB-GENE-040801-65]
ENSDARG00000009209	slc9a6a	chr14	31277167	31278866	+	protein_coding	solute carrier family 9, subfamily A (NHE6, cation proton antiporter 6), member 6a [Source:ZFIN;Acc:ZDB-GENE-070424-104]
ENSDARG00000022895	mcf2a	chr14	32146244	32147943	-	protein_coding	MCF.2 cell line derived transforming sequence a [Source:ZFIN;Acc:ZDB-GENE-030616-52]
ENSDARG00000029885	rab41	chr14	32956774	32958473	-	protein_coding	RAB41, member RAS oncogene family [Source:ZFIN;Acc:ZDB-GENE-040426-2686]
ENSDARG00000078106	ocrl	chr14	33517945	33519644	-	protein_coding	oculocerebrorenal syndrome of Lowe [Source:ZFIN;Acc:ZDB-GENE-061110-61]
ENSDARG00000075467	shisa3	chr14	46219505	46221204	-	protein_coding	shisa family member 3 [Source:ZFIN;Acc:ZDB-GENE-070112-2022]
ENSDARG00000038870	slu7	chr14	47015180	47016879	+	protein_coding	SLU7 homolog, splicing factor [Source:ZFIN;Acc:ZDB-GENE-041114-62]
ENSDARG00000077726	nocta	chr14	47039210	47040909	+	protein_coding	nocturnin a [Source:ZFIN;Acc:ZDB-GENE-050208-306]
ENSDARG00000071353	si:ch211-235e9.8	chr14	47125913	47127612	-	protein_coding	si:ch211-235e9.8 [Source:ZFIN;Acc:ZDB-GENE-141219-2]
ENSDARG00000075253	pik3cb	chr15	7066980	7068679	+	protein_coding	phosphatidylinositol-4,5-bisphosphate 3-kinase, catalytic subunit beta [Source:ZFIN;Acc:ZDB-GENE-030131-1904]
ENSDARG00000016088	rtn2a	chr15	9055726	9057425	-	protein_coding	reticulon 2a [Source:ZFIN;Acc:ZDB-GENE-060420-1]
ENSDARG00000007220	ncam1b	chr15	18493329	18495028	-	protein_coding	neural cell adhesion molecule 1b [Source:ZFIN;Acc:ZDB-GENE-010822-2]
ENSDARG00000054087	irs1	chr15	36071902	36073601	-	protein_coding	insulin receptor substrate 1 [Source:ZFIN;Acc:ZDB-GENE-030131-872]
ENSDARG00000077677	PDGFD	chr15	44908266	44909965	+	protein_coding	platelet derived growth factor D [Source:HGNC Symbol;Acc:HGNC:30620]
ENSDARG00000006345	med17	chr15	160038	161737	+	protein_coding	mediator complex subunit 17 [Source:ZFIN;Acc:ZDB-GENE-040302-1]
ENSDARG00000063475	abcg1	chr15	5035960	5037659	+	protein_coding	ATP-binding cassette, sub-family G (WHITE), member 1 [Source:ZFIN;Acc:ZDB-GENE-070424-84]
ENSDARG00000038106	slc37a4a	chr15	9319768	9321467	+	protein_coding	solute carrier family 37 (glucose-6-phosphate transporter), member 4a [Source:ZFIN;Acc:ZDB-GENE-040426-2230]
ENSDARG00000100971	fxyd6	chr15	12343247	12344946	-	protein_coding	FXYD domain containing ion transport regulator 6 [Source:ZFIN;Acc:ZDB-GENE-030131-5919]
ENSDARG00000033171	trappc6bl	chr15	14146984	14148683	-	protein_coding	trafficking protein particle complex 6b-like [Source:ZFIN;Acc:ZDB-GENE-040426-1602]
ENSDARG00000033845	igsf9ba	chr15	19202582	19204281	-	protein_coding	immunoglobulin superfamily, member 9Ba [Source:ZFIN;Acc:ZDB-GENE-060503-729]
ENSDARG00000037403	HSPA8 (1 of many)	chr15	19741580	19743279	-	protein_coding	si:dkey-4p15.3 [Source:ZFIN;Acc:ZDB-GENE-121214-31]
ENSDARG00000032430	ppp2r1bb	chr15	21807447	21809146	+	protein_coding	protein phosphatase 2, regulatory subunit A, beta b [Source:ZFIN;Acc:ZDB-GENE-040927-20]
ENSDARG00000062315	sik2b	chr15	21877517	21879216	-	protein_coding	salt-inducible kinase 2b [Source:ZFIN;Acc:ZDB-GENE-071012-1]
ENSDARG00000056926	drd2a	chr15	22138384	22140083	-	protein_coding	dopamine receptor D2a [Source:ZFIN;Acc:ZDB-GENE-021119-2]
ENSDARG00000056134	c1qtnf5	chr15	23441077	23442776	-	protein_coding	C1q and tumor necrosis factor related protein 5 [Source:ZFIN;Acc:ZDB-GENE-050706-101]
ENSDARG00000075067	aipl1	chr15	24948492	24950191	-	protein_coding	aryl hydrocarbon receptor interacting protein-like 1 [Source:ZFIN;Acc:ZDB-GENE-131121-577]
ENSDARG00000101859	MNT (1 of many)	chr15	25273844	25275543	-	protein_coding	MAX network transcriptional repressor [Source:HGNC Symbol;Acc:HGNC:7188]
ENSDARG00000079290	si:ch211-162k9.5	chr15	32527583	32529282	+	protein_coding	si:ch211-162k9.5 [Source:ZFIN;Acc:ZDB-GENE-131121-243]
ENSDARG00000097533	BX571880.1	chr15	36282199	36283898	+	lincRNA
ENSDARG00000089838	si:dkey-262k9.4	chr15	36675269	36676968	-	protein_coding	si:dkey-262k9.4 [Source:ZFIN;Acc:ZDB-GENE-131121-545]
ENSDARG00000060638	CLSTN2 (1 of many)	chr15	41684381	41686080	+	protein_coding	si:ch211-276c2.2 [Source:ZFIN;Acc:ZDB-GENE-121214-77]
ENSDARG00000044574	rbms3	chr16	39950434	39952133	-	protein_coding	RNA binding motif, single stranded interacting protein [Source:ZFIN;Acc:ZDB-GENE-060929-244]
ENSDARG00000075733	zyx	chr16	17439551	17441250	-	protein_coding	zyxin [Source:ZFIN;Acc:ZDB-GENE-070928-18]
ENSDARG00000061335	galnt1	chr16	26988471	26990170	+	protein_coding	UDP-N-acetyl-alpha-D-galactosamine:polypeptide N-acetylgalactosaminyltransferase 1 [Source:ZFIN;Acc:ZDB-GENE-030131-2360]
ENSDARG00000040237	mef2d	chr16	29229557	29231256	-	protein_coding	myocyte enhancer factor 2d [Source:ZFIN;Acc:ZDB-GENE-990415-164]
ENSDARG00000000189	sema6e	chr16	30251833	30253532	+	protein_coding	sema domain, transmembrane domain (TM), and cytoplasmic domain, (semaphorin) 6E [Source:ZFIN;Acc:ZDB-GENE-040724-119]
ENSDARG00000088650	si:ch211-208k15.1	chr16	37271664	37273363	-	protein_coding	si:ch211-208k15.1 [Source:ZFIN;Acc:ZDB-GENE-100922-189]
ENSDARG00000067912	si:ch73-373m9.1	chr16	52210933	52212632	+	protein_coding	si:ch73-373m9.1 [Source:ZFIN;Acc:ZDB-GENE-110411-115]
ENSDARG00000032326	mecr	chr16	4876051	4877750	+	protein_coding	mitochondrial trans-2-enoyl-CoA reductase [Source:ZFIN;Acc:ZDB-GENE-050417-399]
ENSDARG00000099189	CU856516.1	chr16	8065340	8067039	-	lincRNA
ENSDARG00000057736	ano10a	chr16	8066141	8067840	+	protein_coding	anoctamin 10a [Source:ZFIN;Acc:ZDB-GENE-050913-43]
ENSDARG00000000370	triob	chr16	8911759	8913458	-	protein_coding	trio Rho guanine nucleotide exchange factor b [Source:ZFIN;Acc:ZDB-GENE-030616-399]
ENSDARG00000058342	grhl2a	chr16	9939350	9941049	-	protein_coding	grainyhead-like transcription factor 2a [Source:ZFIN;Acc:ZDB-GENE-050913-123]
ENSDARG00000104139	atp1a3b	chr16	10884285	10885984	+	protein_coding	ATPase, Na+/K+ transporting, alpha 3b polypeptide [Source:ZFIN;Acc:ZDB-GENE-001212-8]
ENSDARG00000076805	leng8	chr16	12375052	12376751	-	protein_coding	leukocyte receptor cluster (LRC) member 8 [Source:ZFIN;Acc:ZDB-GENE-070410-6]
ENSDARG00000040971	GABARAPL1	chr16	12375269	12376968	+	protein_coding	zgc:92606 [Source:ZFIN;Acc:ZDB-GENE-040718-462]
ENSDARG00000010411	epn1	chr16	12855597	12857296	+	protein_coding	epsin 1 [Source:ZFIN;Acc:ZDB-GENE-040426-2680]
ENSDARG00000105408	BX248082.1	chr16	16146006	16147705	+	antisense
ENSDARG00000092158	cbx3b	chr16	21238112	21239811	-	protein_coding	chromobox homolog 3b [Source:ZFIN;Acc:ZDB-GENE-070628-2]
ENSDARG00000104641	si:ch211-261d7.6	chr16	25200294	25201993	+	protein_coding	si:ch211-261d7.6 [Source:ZFIN;Acc:ZDB-GENE-141216-266]
ENSDARG00000055115	dtnbp1a	chr16	25593867	25595566	-	protein_coding	dystrobrevin binding protein 1a [Source:ZFIN;Acc:ZDB-GENE-040426-1036]
ENSDARG00000091631	si:ch211-197h24.6	chr16	27611371	27613070	+	protein_coding	si:ch211-197h24.6 [Source:ZFIN;Acc:ZDB-GENE-030131-1361]
ENSDARG00000089213	adam15	chr16	28756726	28758425	-	protein_coding	ADAM metallopeptidase domain 15 [Source:ZFIN;Acc:ZDB-GENE-070809-4]
ENSDARG00000039958	utp11l	chr16	33696349	33698048	-	protein_coding	UTP11-like, U3 small nucleolar ribonucleoprotein (yeast) [Source:ZFIN;Acc:ZDB-GENE-030131-8093]
ENSDARG00000010738	zgc:101716	chr16	44710085	44711784	+	protein_coding	zgc:101716 [Source:ZFIN;Acc:ZDB-GENE-041114-135]
ENSDARG00000019717	pbx2	chr16	48672701	48674400	+	protein_coding	pre-B-cell leukemia homeobox 2 [Source:ZFIN;Acc:ZDB-GENE-000405-5]
ENSDARG00000100697	FQ323156.1	chr16	51327011	51328710	+	processed_transcript
ENSDARG00000017219	pabpc1a	chr16	55123420	55125119	+	protein_coding	poly(A) binding protein, cytoplasmic 1a [Source:ZFIN;Acc:ZDB-GENE-030131-3238]
ENSDARG00000044073	fuca2	chr17	6294372	6296071	-	protein_coding	fucosidase, alpha-L- 2, plasma [Source:ZFIN;Acc:ZDB-GENE-040822-39]
ENSDARG00000076889	ralgapa1	chr17	12710179	12711878	+	protein_coding	Ral GTPase activating protein, alpha subunit 1 (catalytic) [Source:ZFIN;Acc:ZDB-GENE-080806-1]
ENSDARG00000040727	tfb1m	chr17	49192516	49194215	-	protein_coding	transcription factor B1, mitochondrial [Source:ZFIN;Acc:ZDB-GENE-060929-1010]
ENSDARG00000098240	meis2a	chr17	52734767	52736466	+	protein_coding	Meis homeobox 2a [Source:ZFIN;Acc:ZDB-GENE-020122-2]
ENSDARG00000079220	wdr20a	chr17	1524802	1526501	-	protein_coding	WD repeat domain 20a [Source:ZFIN;Acc:ZDB-GENE-120406-3]
ENSDARG00000089245	dusp23b	chr17	6117828	6119527	+	protein_coding	dual specificity phosphatase 23b [Source:ZFIN;Acc:ZDB-GENE-040718-163]
ENSDARG00000043932	stmn4l	chr17	12542965	12544664	+	protein_coding	stathmin-like 4, like [Source:ZFIN;Acc:ZDB-GENE-040718-301]
ENSDARG00000007693	nfkbiab	chr17	12787952	12789651	+	protein_coding	nuclear factor of kappa light polypeptide gene enhancer in B-cells inhibitor, alpha b [Source:ZFIN;Acc:ZDB-GENE-030131-1819]
ENSDARG00000070954	hmx2	chr17	21764117	21765816	-	protein_coding	H6 family homeobox 2 [Source:ZFIN;Acc:ZDB-GENE-080506-2]
ENSDARG00000056949	htr7a	chr17	23525493	23527192	-	protein_coding	5-hydroxytryptamine (serotonin) receptor 7a [Source:ZFIN;Acc:ZDB-GENE-130530-666]
ENSDARG00000017773	slc16a12a	chr17	23556791	23558490	+	protein_coding	solute carrier family 16, member 12a [Source:ZFIN;Acc:ZDB-GENE-080721-24]
ENSDARG00000071021	papss2a	chr17	23689124	23690823	-	protein_coding	3'-phosphoadenosine 5'-phosphosulfate synthase 2a [Source:ZFIN;Acc:ZDB-GENE-061110-85]
ENSDARG00000094258	commd9	chr17	24598738	24600437	+	protein_coding	COMM domain containing 9 [Source:ZFIN;Acc:ZDB-GENE-070424-139]
ENSDARG00000031782	aim1a	chr17	25461574	25463273	+	protein_coding	absent in melanoma 1a [Source:ZFIN;Acc:ZDB-GENE-041008-100]
ENSDARG00000096445	si:ch211-214p16.3	chr17	25651938	25653637	-	protein_coding	si:ch211-214p16.3 [Source:ZFIN;Acc:ZDB-GENE-120709-93]
ENSDARG00000060854	kctd3	chr17	29327142	29328841	+	protein_coding	potassium channel tetramerization domain containing 3 [Source:ZFIN;Acc:ZDB-GENE-060503-169]
ENSDARG00000053858	crip1	chr17	37447676	37449375	-	protein_coding	cysteine-rich protein 1 [Source:ZFIN;Acc:ZDB-GENE-041111-1]
ENSDARG00000019364	mbip	chr17	38346761	38348460	+	protein_coding	MAP3K12 binding inhibitory protein 1 [Source:ZFIN;Acc:ZDB-GENE-060810-43]
ENSDARG00000079753	kiz	chr17	42037594	42039293	+	protein_coding	kizuna centrosomal protein [Source:ZFIN;Acc:ZDB-GENE-070615-4]
ENSDARG00000060430	zfyve28	chr17	43604127	43605826	-	protein_coding	zinc finger, FYVE domain containing 28 [Source:ZFIN;Acc:ZDB-GENE-061103-208]
ENSDARG00000053485	aldh6a1	chr17	44990678	44992377	-	protein_coding	aldehyde dehydrogenase 6 family, member A1 [Source:ZFIN;Acc:ZDB-GENE-030131-9192]
ENSDARG00000091723	si:ch211-202f3.4	chr17	45617887	45619586	+	protein_coding	si:ch211-202f3.4 [Source:ZFIN;Acc:ZDB-GENE-131120-116]
ENSDARG00000020581	otofb	chr17	50294737	50296436	-	protein_coding	otoferlin b [Source:ZFIN;Acc:ZDB-GENE-110406-5]
ENSDARG00000060813	plekha7a	chr18	27117273	27118972	+	protein_coding	pleckstrin homology domain containing, family A member 7a [Source:ZFIN;Acc:ZDB-GENE-050419-75]
ENSDARG00000101661	ulk3	chr18	5755359	5757058	+	protein_coding	unc-51 like kinase 3 [Source:ZFIN;Acc:ZDB-GENE-070410-33]
ENSDARG00000077231	vwf	chr18	7191320	7193019	+	protein_coding	von Willebrand factor [Source:ZFIN;Acc:ZDB-GENE-070103-1]
ENSDARG00000031712	grm3	chr18	9057943	9059642	-	protein_coding	glutamate receptor, metabotropic 3 [Source:ZFIN;Acc:ZDB-GENE-061009-13]
ENSDARG00000098880	pclob	chr18	9644456	9646155	+	protein_coding	piccolo presynaptic cytomatrix protein b [Source:ZFIN;Acc:ZDB-GENE-030131-8100]
ENSDARG00000061796	rasgrp4	chr18	35760329	35762028	+	protein_coding	RAS guanyl releasing protein 4 [Source:ZFIN;Acc:ZDB-GENE-050419-110]
ENSDARG00000007180	slc30a4	chr18	5655870	5657569	+	protein_coding	solute carrier family 30 (zinc transporter), member 4 [Source:ZFIN;Acc:ZDB-GENE-040426-1408]
ENSDARG00000063167	chkb	chr18	8360645	8362344	+	protein_coding	choline kinase beta [Source:ZFIN;Acc:ZDB-GENE-030131-2928]
ENSDARG00000011583	cry1ab	chr18	15136505	15138204	+	protein_coding	cryptochrome circadian clock 1ab [Source:ZFIN;Acc:ZDB-GENE-010426-3]
ENSDARG00000062855	plekhg7	chr18	15942683	15944382	-	protein_coding	pleckstrin homology domain containing, family G (with RhoGef domain) member 7 [Source:ZFIN;Acc:ZDB-GENE-070410-15]
ENSDARG00000041747	sspn	chr18	16133957	16135656	-	protein_coding	sarcospan (Kras oncogene-associated gene) [Source:ZFIN;Acc:ZDB-GENE-051127-43]
ENSDARG00000041691	bhlhe41	chr18	16135285	16136984	+	protein_coding	basic helix-loop-helix family, member e41 [Source:ZFIN;Acc:ZDB-GENE-050419-146]
ENSDARG00000041599	zgc:91860	chr18	17437939	17439638	+	protein_coding	zgc:91860 [Source:ZFIN;Acc:ZDB-GENE-040704-34]
ENSDARG00000062721	dennd4a	chr18	19105876	19107575	-	protein_coding	DENN/MADD domain containing 4A [Source:ZFIN;Acc:ZDB-GENE-060503-285]
ENSDARG00000062370	bcl2l13	chr18	20618760	20620459	-	protein_coding	BCL2-like 13 (apoptosis facilitator) [Source:ZFIN;Acc:ZDB-GENE-050419-215]
ENSDARG00000014680	znf710a	chr18	26100778	26102477	+	protein_coding	zinc finger protein 710a [Source:ZFIN;Acc:ZDB-GENE-030131-5559]
ENSDARG00000073824	RASGRF1	chr18	26403991	26405690	+	protein_coding	si:ch211-234p18.3 [Source:ZFIN;Acc:ZDB-GENE-090311-28]
ENSDARG00000061977	ppfibp2a	chr18	29177072	29178771	+	protein_coding	PTPRF interacting protein, binding protein 2a (liprin beta 2) [Source:ZFIN;Acc:ZDB-GENE-070705-277]
ENSDARG00000035966	pgr	chr18	41828346	41830045	+	protein_coding	progesterone receptor [Source:ZFIN;Acc:ZDB-GENE-990415-214]
ENSDARG00000040358	spred3	chr18	44617599	44619298	-	protein_coding	sprouty-related, EVH1 domain containing 3 [Source:ZFIN;Acc:ZDB-GENE-061207-31]
ENSDARG00000041006	st3gal4	chr18	48750432	48752131	-	protein_coding	ST3 beta-galactoside alpha-2,3-sialyltransferase 4 [Source:ZFIN;Acc:ZDB-GENE-050309-174]
ENSDARG00000105003	scn1bb	chr19	87091	88790	+	protein_coding	sodium channel, voltage-gated, type I, beta b [Source:ZFIN;Acc:ZDB-GENE-090408-1]
ENSDARG00000012688	eif1b	chr19	5500019	5501718	+	protein_coding	eukaryotic translation initiation factor 1B [Source:ZFIN;Acc:ZDB-GENE-030131-956]
ENSDARG00000057986	ints8	chr19	18537416	18539115	-	protein_coding	integrator complex subunit 8 [Source:ZFIN;Acc:ZDB-GENE-050522-556]
ENSDARG00000035907	fam49al	chr19	31044639	31046338	+	protein_coding	family with sequence similarity 49, member A [Source:ZFIN;Acc:ZDB-GENE-040801-125]
ENSDARG00000016160	gmpr	chr19	32900150	32901849	-	protein_coding	guanosine monophosphate reductase [Source:ZFIN;Acc:ZDB-GENE-050522-48]
ENSDARG00000054848	pdk4	chr19	41894738	41896437	-	protein_coding	pyruvate dehydrogenase kinase, isozyme 4 [Source:ZFIN;Acc:ZDB-GENE-060503-754]
ENSDARG00000020176	CABZ01067086.1	chr19	204259	205958	-	protein_coding
ENSDARG00000076134	zgc:162972	chr19	6975758	6977457	+	protein_coding	zgc:162972 [Source:ZFIN;Acc:ZDB-GENE-070424-49]
ENSDARG00000091951	si:dkeyp-85e10.2	chr19	7957696	7959395	+	protein_coding	si:dkeyp-85e10.2 [Source:ZFIN;Acc:ZDB-GENE-060503-185]
ENSDARG00000058672	si:dkey-266f7.1	chr19	7996364	7998063	+	protein_coding	si:dkey-266f7.1 [Source:ZFIN;Acc:ZDB-GENE-061207-67]
ENSDARG00000016765	scamp3	chr19	9064771	9066470	+	protein_coding	secretory carrier membrane protein 3 [Source:ZFIN;Acc:ZDB-GENE-041114-33]
ENSDARG00000094637	CR391921.1	chr19	18376061	18377760	-	lincRNA
ENSDARG00000074216	COLQ (1 of many)	chr19	19838461	19840160	+	protein_coding	wu:fc38h03 [Source:ZFIN;Acc:ZDB-GENE-030131-3430]
ENSDARG00000036190	txnl4a	chr19	21207413	21209112	+	protein_coding	thioredoxin-like 4A [Source:ZFIN;Acc:ZDB-GENE-041010-25]
ENSDARG00000035883	nt5c1aa	chr19	33217323	33219022	-	protein_coding	5'-nucleotidase, cytosolic IAa [Source:ZFIN;Acc:ZDB-GENE-070705-423]
ENSDARG00000032859	fam84b	chr19	33550543	33552242	+	protein_coding	family with sequence similarity 84, member B [Source:ZFIN;Acc:ZDB-GENE-060929-1130]
ENSDARG00000004436	fam92a1	chr19	33680807	33682506	-	protein_coding	family with sequence similarity 92, member A1 [Source:ZFIN;Acc:ZDB-GENE-040801-123]
ENSDARG00000035676	ptp4a2b	chr19	35878261	35879960	-	protein_coding	protein tyrosine phosphatase type IVA, member 2b [Source:ZFIN;Acc:ZDB-GENE-041114-111]
ENSDARG00000070358	smim12	chr19	37547079	37548778	+	protein_coding	small integral membrane protein 12 [Source:ZFIN;Acc:ZDB-GENE-050320-101]
ENSDARG00000096327	cd164l2	chr19	43966081	43967780	+	protein_coding	CD164 sialomucin-like 2 [Source:ZFIN;Acc:ZDB-GENE-120215-174]
ENSDARG00000092310	si:ch211-199g17.2	chr19	43995741	43997440	+	protein_coding	si:ch211-199g17.2 [Source:ZFIN;Acc:ZDB-GENE-060503-396]
ENSDARG00000043553	ches1	chr20	16649130	16650829	-	protein_coding	checkpoint suppressor 1 [Source:ZFIN;Acc:ZDB-GENE-040217-1]
ENSDARG00000025309	dpf3	chr20	28552104	28553803	+	protein_coding	D4, zinc and double PHD fingers, family 3 [Source:ZFIN;Acc:ZDB-GENE-041014-190]
ENSDARG00000039987	hivep2a	chr20	37619491	37621190	-	protein_coding	human immunodeficiency virus type I enhancer binding protein 2a [Source:ZFIN;Acc:ZDB-GENE-041014-354]
ENSDARG00000005416	map3k5	chr20	3041367	3043066	-	protein_coding	mitogen-activated protein kinase kinase kinase 5 [Source:ZFIN;Acc:ZDB-GENE-030827-3]
ENSDARG00000079107	clec11a	chr20	4100206	4101905	-	protein_coding	C-type lectin domain family 11, member A [Source:ZFIN;Acc:ZDB-GENE-130530-861]
ENSDARG00000031911	tns3.2	chr20	6559863	6561562	+	protein_coding	tensin 3, tandem duplicate 2 [Source:ZFIN;Acc:ZDB-GENE-081031-95]
ENSDARG00000059925	usp24	chr20	7559142	7560841	-	protein_coding	ubiquitin specific peptidase 24 [Source:ZFIN;Acc:ZDB-GENE-030131-4356]
ENSDARG00000096508	BX322618.1	chr20	12204087	12205786	+	lincRNA
ENSDARG00000096655	BX901920.1	chr20	14759660	14761359	+	antisense
ENSDARG00000007783	blk	chr20	19273947	19275646	+	protein_coding	BLK proto-oncogene, Src family tyrosine kinase [Source:ZFIN;Acc:ZDB-GENE-040724-106]
ENSDARG00000043317	kita	chr20	22478529	22480228	-	protein_coding	v-kit Hardy-Zuckerman 4 feline sarcoma viral oncogene homolog a [Source:ZFIN;Acc:ZDB-GENE-980526-464]
ENSDARG00000056089	nrbp1	chr20	26101943	26103642	+	protein_coding	nuclear receptor binding protein 1 [Source:ZFIN;Acc:ZDB-GENE-041001-146]
ENSDARG00000042644	sod2	chr20	31033554	31035253	+	protein_coding	superoxide dismutase 2, mitochondrial [Source:ZFIN;Acc:ZDB-GENE-030131-7742]
ENSDARG00000002656	stxbp5a	chr20	31878863	31880562	-	protein_coding	syntaxin binding protein 5a (tomosyn) [Source:ZFIN;Acc:ZDB-GENE-041001-161]
ENSDARG00000019062	arpc5b	chr20	34247290	34248989	+	protein_coding	actin related protein 2/3 complex, subunit 5B [Source:ZFIN;Acc:ZDB-GENE-040120-7]
ENSDARG00000041870	ift172	chr20	38932858	38934557	+	protein_coding	intraflagellar transport 172 [Source:ZFIN;Acc:ZDB-GENE-040827-1]
ENSDARG00000010434	clu	chr20	39370427	39372126	-	protein_coding	clusterin [Source:ZFIN;Acc:ZDB-GENE-040426-1774]
ENSDARG00000008060	scara3	chr20	39379469	39381168	+	protein_coding	scavenger receptor class A, member 3 [Source:ZFIN;Acc:ZDB-GENE-041014-317]
ENSDARG00000011818	batf	chr20	46667329	46669028	+	protein_coding	basic leucine zipper transcription factor, ATF-like [Source:ZFIN;Acc:ZDB-GENE-041014-291]
ENSDARG00000029150	hsp90ab1	chr20	51387097	51388796	+	protein_coding	heat shock protein 90, alpha (cytosolic), class B member 1 [Source:ZFIN;Acc:ZDB-GENE-990415-95]
ENSDARG00000044415	tlr5a	chr20	51664326	51666025	+	protein_coding	toll-like receptor 5a [Source:ZFIN;Acc:ZDB-GENE-040219-14]
ENSDARG00000104086	arhgap39	chr20	52635753	52637452	+	protein_coding	Rho GTPase activating protein 39 [Source:ZFIN;Acc:ZDB-GENE-041014-247]
ENSDARG00000058693	cast	chr21	11554099	11555798	-	protein_coding	calpastatin [Source:ZFIN;Acc:ZDB-GENE-050810-2]
ENSDARG00000101028	fnbp1b	chr21	6105692	6107391	+	protein_coding	formin binding protein 1b [Source:ZFIN;Acc:ZDB-GENE-091117-6]
ENSDARG00000104101	RIMBP2 (1 of many)	chr21	18328949	18330648	+	protein_coding	si:ch73-287m6.1 [Source:ZFIN;Acc:ZDB-GENE-100920-2]
ENSDARG00000074863	si:dkey-112m2.1	chr21	18722751	18724450	-	protein_coding	si:dkey-112m2.1 [Source:ZFIN;Acc:ZDB-GENE-091116-15]
ENSDARG00000016048	gpat3	chr21	19280150	19281849	-	protein_coding	glycerol-3-phosphate acyltransferase 3 [Source:ZFIN;Acc:ZDB-GENE-040718-436]
ENSDARG00000069748	capn5b	chr21	22120607	22122306	+	protein_coding	calpain 5b [Source:ZFIN;Acc:ZDB-GENE-091116-29]
ENSDARG00000061454	nrxn2a	chr21	28304083	28305782	-	protein_coding	neurexin 2a [Source:ZFIN;Acc:ZDB-GENE-070206-5]
ENSDARG00000055523	slc22a6l	chr21	28440467	28442166	+	protein_coding	solute carrier family 22 (organic anion transporter), member 6, like [Source:ZFIN;Acc:ZDB-GENE-040426-2249]
ENSDARG00000102975	hmp19	chr21	41444976	41446675	-	protein_coding	HMP19 protein [Source:ZFIN;Acc:ZDB-GENE-030131-3694]
ENSDARG00000102171	fnip1	chr21	45466700	45468399	+	protein_coding	folliculin interacting protein 1 [Source:ZFIN;Acc:ZDB-GENE-030131-3586]
ENSDARG00000034291	rpl37	chr21	5035309	5037008	-	protein_coding	ribosomal protein L37 [Source:ZFIN;Acc:ZDB-GENE-040625-39]
ENSDARG00000017602	ccng2	chr21	5693959	5695658	+	protein_coding	cyclin G2 [Source:ZFIN;Acc:ZDB-GENE-021016-1]
ENSDARG00000057882	arpc3	chr21	16985865	16987564	+	protein_coding	actin related protein 2/3 complex, subunit 3 [Source:ZFIN;Acc:ZDB-GENE-040625-107]
ENSDARG00000020730	smpd4	chr21	18882282	18883981	+	protein_coding	sphingomyelin phosphodiesterase 4 [Source:ZFIN;Acc:ZDB-GENE-040426-2672]
ENSDARG00000057556	rpl17	chr21	19023614	19025313	+	protein_coding	ribosomal protein L17 [Source:ZFIN;Acc:ZDB-GENE-030131-8585]
ENSDARG00000044694	si:ch211-147j13.3	chr21	19814425	19816124	+	protein_coding	si:ch211-147j13.3 [Source:ZFIN;Acc:ZDB-GENE-091204-85]
ENSDARG00000002020	rictorb	chr21	21157342	21159041	+	protein_coding	RPTOR independent companion of MTOR, complex 2b [Source:ZFIN;Acc:ZDB-GENE-070810-5]
ENSDARG00000057039	si:ch211-191j22.8	chr21	21267855	21269554	+	protein_coding	si:ch211-191j22.8 [Source:ZFIN;Acc:ZDB-GENE-091204-10]
ENSDARG00000010047	neu3.2	chr21	21758526	21760225	+	protein_coding	sialidase 3 (membrane sialidase), tandem duplicate 2 [Source:ZFIN;Acc:ZDB-GENE-040801-262]
ENSDARG00000044619	birc2	chr21	22807211	22808910	+	protein_coding	baculoviral IAP repeat containing 2 [Source:ZFIN;Acc:ZDB-GENE-030825-6]
ENSDARG00000089836	MRPS12	chr21	25528588	25530287	-	protein_coding	si:dkey-17e16.10 [Source:ZFIN;Acc:ZDB-GENE-091204-48]
ENSDARG00000100602	CR388166.2	chr21	25612140	25613839	+	protein_coding
ENSDARG00000069498	phkg1b	chr21	25648964	25650663	-	protein_coding	phosphorylase kinase, gamma 1b (muscle) [Source:ZFIN;Acc:ZDB-GENE-050522-52]
ENSDARG00000032714	gria1b	chr21	26213850	26215549	-	protein_coding	glutamate receptor, ionotropic, AMPA 1b [Source:ZFIN;Acc:ZDB-GENE-020125-2]
ENSDARG00000037012	slc3a2b	chr21	26683173	26684872	+	protein_coding	solute carrier family 3 (amino acid transporter heavy chain), member 2b [Source:ZFIN;Acc:ZDB-GENE-040122-2]
ENSDARG00000067591	puraa	chr21	28685903	28687602	+	protein_coding	purine-rich element binding protein Aa [Source:ZFIN;Acc:ZDB-GENE-040624-8]
ENSDARG00000005908	clk4b	chr21	32267652	32269351	-	protein_coding	CDC-like kinase 4b [Source:ZFIN;Acc:ZDB-GENE-050227-19]
ENSDARG00000079283	si:ch211-247j9.1	chr21	32304138	32305837	+	protein_coding	si:ch211-247j9.1 [Source:ZFIN;Acc:ZDB-GENE-091204-212]
ENSDARG00000003127	zgc:123105	chr21	32429399	32431098	-	protein_coding	zgc:123105 [Source:ZFIN;Acc:ZDB-GENE-051113-272]
ENSDARG00000046012	slc47a1	chr21	39916546	39918245	+	protein_coding	solute carrier family 47 (multidrug and toxin extrusion), member 1 [Source:ZFIN;Acc:ZDB-GENE-050327-20]
ENSDARG00000027618	grip2b	chr22	31413504	31415203	+	protein_coding	glutamate receptor interacting protein 2b [Source:ZFIN;Acc:ZDB-GENE-070705-172]
ENSDARG00000095617	znf1157	chr22	2237205	2238904	+	protein_coding	zinc finger protein 1157 [Source:ZFIN;Acc:ZDB-GENE-070424-89]
ENSDARG00000074868	AL929017.1	chr22	2237949	2239648	+	processed_transcript
ENSDARG00000053074	gipc3	chr22	3282902	3284601	+	protein_coding	GIPC PDZ domain containing family, member 3 [Source:ZFIN;Acc:ZDB-GENE-060616-326]
ENSDARG00000101362	mibp	chr22	4732440	4734139	+	protein_coding	muscle-specific beta 1 integrin binding protein [Source:ZFIN;Acc:ZDB-GENE-030404-1]
ENSDARG00000036510	ccnt2b	chr22	12131266	12132965	+	protein_coding	cyclin T2b [Source:ZFIN;Acc:ZDB-GENE-030131-183]
ENSDARG00000041602	MMADHC (1 of many)	chr22	12568866	12570565	+	protein_coding	zgc:92335 [Source:ZFIN;Acc:ZDB-GENE-040718-152]
ENSDARG00000032318	mfsd6a	chr22	12900765	12902464	-	protein_coding	major facilitator superfamily domain containing 6a [Source:ZFIN;Acc:ZDB-GENE-050208-335]
ENSDARG00000042684	serpinc1	chr22	15994440	15996139	+	protein_coding	serpin peptidase inhibitor, clade C (antithrombin), member 1 [Source:ZFIN;Acc:ZDB-GENE-030131-264]
ENSDARG00000057016	cdc14ab	chr22	16248767	16250466	-	protein_coding	cell division cycle 14Ab [Source:ZFIN;Acc:ZDB-GENE-070705-309]
ENSDARG00000014623	si:ch211-212d10.1	chr22	18503725	18505424	+	protein_coding	si:ch211-212d10.1 [Source:ZFIN;Acc:ZDB-GENE-050208-355]
ENSDARG00000079876	C2CD4C (1 of many)	chr22	22105510	22107209	-	protein_coding	C2 calcium dependent domain containing 4C [Source:HGNC Symbol;Acc:HGNC:29417]
ENSDARG00000052748	capn1b	chr22	26303798	26305497	-	protein_coding	calpain 1, (mu/I) large subunit b [Source:ZFIN;Acc:ZDB-GENE-060503-491]
ENSDARG00000054418	ssuh2.2	chr22	31024397	31026096	-	protein_coding	ssu-2 homolog, tandem duplicate 2 [Source:ZFIN;Acc:ZDB-GENE-060421-4694]
ENSDARG00000038442	plcg1	chr23	2847015	2848714	+	protein_coding	phospholipase C, gamma 1 [Source:ZFIN;Acc:ZDB-GENE-030421-3]
ENSDARG00000017154	cables2b	chr23	9151720	9153419	+	protein_coding	Cdk5 and Abl enzyme substrate 2b [Source:ZFIN;Acc:ZDB-GENE-090313-249]
ENSDARG00000075842	pigt	chr23	12425428	12427127	+	protein_coding	phosphatidylinositol glycan anchor biosynthesis, class T [Source:ZFIN;Acc:ZDB-GENE-090313-46]
ENSDARG00000002084	lamb2	chr23	20331948	20333647	-	protein_coding	laminin, beta 2 (laminin S) [Source:ZFIN;Acc:ZDB-GENE-081030-4]
ENSDARG00000011298	atf7a	chr23	27569254	27570953	-	protein_coding	activating transcription factor 7a [Source:ZFIN;Acc:ZDB-GENE-050721-2]
ENSDARG00000037030	casz1	chr23	29138790	29140489	-	protein_coding	castor zinc finger 1 [Source:ZFIN;Acc:ZDB-GENE-060130-108]
ENSDARG00000060394	mtfr2	chr23	31986528	31988227	-	protein_coding	mitochondrial fission regulator 2 [Source:ZFIN;Acc:ZDB-GENE-061013-398]
ENSDARG00000105179	HDAC7 (1 of many)	chr23	39481	41180	-	protein_coding	histone deacetylase 7 [Source:HGNC Symbol;Acc:HGNC:14067]
ENSDARG00000076496	frmd4bb	chr23	798912	800611	+	protein_coding	FERM domain containing 4Bb [Source:ZFIN;Acc:ZDB-GENE-100921-74]
ENSDARG00000059044	epm2a	chr23	1547889	1549588	-	protein_coding	epilepsy, progressive myoclonus type 2A, Lafora disease (laforin) [Source:ZFIN;Acc:ZDB-GENE-100922-143]
ENSDARG00000058243	phactr3a	chr23	12310727	12312426	-	protein_coding	phosphatase and actin regulator 3a [Source:ZFIN;Acc:ZDB-GENE-080220-4]
ENSDARG00000071065	g6pd	chr23	14101241	14102940	-	protein_coding	glucose-6-phosphate dehydrogenase [Source:ZFIN;Acc:ZDB-GENE-070508-4]
ENSDARG00000057403	CR847953.1	chr23	18944412	18946111	-	processed_transcript
ENSDARG00000074201	flna	chr23	19848616	19850315	+	protein_coding	filamin A, alpha (actin binding protein 280) [Source:ZFIN;Acc:ZDB-GENE-030131-2145]
ENSDARG00000037517	slc35c2	chr23	20503848	20505547	+	protein_coding	solute carrier family 35 (GDP-fucose transporter), member C2 [Source:ZFIN;Acc:ZDB-GENE-030131-2202]
ENSDARG00000067630	zgc:154075	chr23	20875426	20877125	+	protein_coding	zgc:154075 [Source:ZFIN;Acc:ZDB-GENE-060929-910]
ENSDARG00000095377	CR388207.1	chr23	22648172	22649871	+	antisense
ENSDARG00000056318	kansl2	chr23	24678211	24679910	+	protein_coding	KAT8 regulatory NSL complex subunit 2 [Source:ZFIN;Acc:ZDB-GENE-041010-67]
ENSDARG00000038954	ctnnbip1	chr23	29824990	29826689	-	protein_coding	catenin, beta interacting protein 1 [Source:ZFIN;Acc:ZDB-GENE-000906-3]
ENSDARG00000025522	sgk1	chr23	31719030	31720729	-	protein_coding	serum/glucocorticoid regulated kinase 1 [Source:ZFIN;Acc:ZDB-GENE-030131-2860]
ENSDARG00000070393	COQ10A	chr23	34017867	34019566	-	protein_coding	si:dkey-190g6.2 [Source:ZFIN;Acc:ZDB-GENE-090312-30]
ENSDARG00000098252	cpne9	chr23	35218408	35220107	-	protein_coding	copine family member IX [Source:ZFIN;Acc:ZDB-GENE-090311-49]
ENSDARG00000036675	hnrnpa1b	chr23	36206235	36207934	+	protein_coding	heterogeneous nuclear ribonucleoprotein A1b [Source:ZFIN;Acc:ZDB-GENE-030912-14]
ENSDARG00000070222	fam43b	chr23	37219799	37221498	+	protein_coding	family with sequence similarity 43, member B [Source:ZFIN;Acc:ZDB-GENE-040912-11]
ENSDARG00000099203	atp1b2a	chr23	45019270	45020969	+	protein_coding	ATPase, Na+/K+ transporting, beta 2a polypeptide [Source:ZFIN;Acc:ZDB-GENE-001127-2]
ENSDARG00000098990	CABZ01102528.1	chr23	46268212	46269911	-	protein_coding
ENSDARG00000075369	nck1b	chr24	3435058	3436757	-	protein_coding	NCK adaptor protein 1b [Source:ZFIN;Acc:ZDB-GENE-090317-1]
ENSDARG00000088842	si:dkey-192j17.1	chr24	13421397	13423096	-	protein_coding	si:dkey-192j17.1 [Source:ZFIN;Acc:ZDB-GENE-091113-38]
ENSDARG00000079547	zbtb47b	chr24	20496172	20497871	-	protein_coding	zinc finger and BTB domain containing 47b [Source:ZFIN;Acc:ZDB-GENE-091118-34]
ENSDARG00000017910	pdss1	chr24	5994938	5996637	-	protein_coding	prenyl (decaprenyl) diphosphate synthase, subunit 1 [Source:ZFIN;Acc:ZDB-GENE-030131-4430]
ENSDARG00000016897	fbxo15	chr24	15509309	15511008	+	protein_coding	F-box protein 15 [Source:ZFIN;Acc:ZDB-GENE-080416-4]
ENSDARG00000100236	cspp1a	chr24	18568292	18569991	+	protein_coding	centrosome and spindle pole associated protein 1a [Source:ZFIN;Acc:ZDB-GENE-120709-73]
ENSDARG00000038428	sulf1	chr24	19433015	19434714	+	protein_coding	sulfatase 1 [Source:ZFIN;Acc:ZDB-GENE-030131-9242]
ENSDARG00000016360	kpna1	chr24	20812163	20813862	-	protein_coding	karyopherin alpha 1 (importin alpha 5) [Source:ZFIN;Acc:ZDB-GENE-091116-39]
ENSDARG00000105185	snx7	chr24	30269272	30270971	-	protein_coding	sorting nexin 7 [Source:ZFIN;Acc:ZDB-GENE-040704-77]
ENSDARG00000056888	dnah5l	chr24	33701991	33703690	+	protein_coding	dynein, axonemal, heavy chain 5 like [Source:ZFIN;Acc:ZDB-GENE-091204-287]
ENSDARG00000103146	nlrc3	chr24	37557861	37559560	+	protein_coding	NLR family, CARD domain containing 3 [Source:ZFIN;Acc:ZDB-GENE-071119-1]
ENSDARG00000079110	cluap1	chr24	37585052	37586751	-	protein_coding	clusterin associated protein 1 [Source:ZFIN;Acc:ZDB-GENE-040426-1943]
ENSDARG00000101350	ARHGAP28	chr24	41913322	41915021	-	protein_coding	Rho GTPase activating protein 28 [Source:HGNC Symbol;Acc:HGNC:25509]
ENSDARG00000100151	TUBGCP6	chr25	5627307	5629006	+	protein_coding	tubulin gamma complex associated protein 6 [Source:HGNC Symbol;Acc:HGNC:18127]
ENSDARG00000045792	si:dkey-106n21.1	chr25	18153152	18154851	-	protein_coding	si:dkey-106n21.1 [Source:ZFIN;Acc:ZDB-GENE-131120-167]
ENSDARG00000079374	tjp1b	chr25	31659096	31660795	+	protein_coding	tight junction protein 1b [Source:ZFIN;Acc:ZDB-GENE-070925-1]
ENSDARG00000054323	pparab	chr25	2106044	2107743	+	protein_coding	peroxisome proliferator-activated receptor alpha b [Source:ZFIN;Acc:ZDB-GENE-990415-211]
ENSDARG00000103643	unc45a	chr25	8555308	8557007	-	protein_coding	unc-45 myosin chaperone A [Source:ZFIN;Acc:ZDB-GENE-050417-158]
ENSDARG00000101778	ca5a	chr25	12707019	12708718	-	protein_coding	carbonic anhydrase Va [Source:ZFIN;Acc:ZDB-GENE-080220-57]
ENSDARG00000051899	exoc3l1	chr25	14333450	14335149	-	protein_coding	exocyst complex component 3-like 1 [Source:ZFIN;Acc:ZDB-GENE-061207-36]
ENSDARG00000086450	tdg.2	chr25	18854123	18855822	+	protein_coding	thymine DNA glycosylase, tandem duplicate 2 [Source:ZFIN;Acc:ZDB-GENE-131121-30]
ENSDARG00000077569	lrrn3a	chr25	21242662	21244361	+	protein_coding	leucine rich repeat neuronal 3a [Source:ZFIN;Acc:ZDB-GENE-061220-7]
ENSDARG00000079917	rassf7a	chr25	25368051	25369750	+	protein_coding	Ras association (RalGDS/AF-6) domain family (N-terminal) member 7a [Source:ZFIN;Acc:ZDB-GENE-091013-3]
ENSDARG00000097879	BX323824.1	chr25	34069082	34070781	+	antisense
ENSDARG00000076899	slc2a13b	chr25	35160295	35161994	+	protein_coding	solute carrier family 2 (facilitated glucose transporter), member 13b [Source:ZFIN;Acc:ZDB-GENE-090812-1]
ENSDARG00000102748	CABZ01074745.1	chrUn_KN149951v1	-1070	629	+	protein_coding
ENSDARG00000099719	cdkn1d	chrUn_KN149955v1	2648	4347	+	protein_coding	cyclin-dependent kinase inhibitor 1D [Source:ZFIN;Acc:ZDB-GENE-110215-1]
ENSDARG00000098508	CABZ01111958.1	chrUn_KN150067v1	13046	14745	-	protein_coding
ENSDARG00000103414	CABZ01092944.1	chrUn_KN150088v1	-299	1400	+	protein_coding

## Sheet: GREGenes_in_invertedGenes
Ensembl Gene ID	Gene Name	Chromosome	Strand	Start	End	Biotype	Description
ENSDARG00000103038	pik3r3a	chr2	+	3115626	3146824	protein_coding	phosphoinositide-3-kinase, regulatory subunit 3a (gamma) [Source:ZFIN;Acc:ZDB-GENE-040426-1978]
ENSDARG00000038754	plk3	chr2	+	35621180	35629332	protein_coding	polo-like kinase 3 (Drosophila) [Source:ZFIN;Acc:ZDB-GENE-030131-6134]
ENSDARG00000035468	slc25a25b	chr5	+	31179758	31206460	protein_coding	solute carrier family 25 (mitochondrial carrier; phosphate carrier), member 25b [Source:ZFIN;Acc:ZDB-GENE-060526-340]
ENSDARG00000074120	usp2b	chr5	-	62395349	62415841	protein_coding	ubiquitin specific peptidase 2b [Source:ZFIN;Acc:ZDB-GENE-100208-2]
ENSDARG00000028396	fkbp5	chr6	+	41098522	41118517	protein_coding	FK506 binding protein 5 [Source:ZFIN;Acc:ZDB-GENE-030616-630]
ENSDARG00000088087	kdm6ba	chr7	+	21365762	21512136	protein_coding	lysine (K)-specific demethylase 6B, a [Source:ZFIN;Acc:ZDB-GENE-091005-1]
ENSDARG00000001975	hsd11b2	chr7	-	34840575	34854897	protein_coding	hydroxysteroid (11-beta) dehydrogenase 2 [Source:ZFIN;Acc:ZDB-GENE-030131-6030]
ENSDARG00000069377	si:dkey-242g16.2	chr10	-	18029854	18031345	protein_coding	si:dkey-242g16.2 [Source:ZFIN;Acc:ZDB-GENE-030131-8324]
ENSDARG00000068992	hspa8	chr10	+	29963106	29967488	protein_coding	heat shock protein 8 [Source:ZFIN;Acc:ZDB-GENE-990415-92]
ENSDARG00000089885	slc16a12b	chr12	+	16845841	16865094	protein_coding	solute carrier family 16, member 12b [Source:ZFIN;Acc:ZDB-GENE-050522-80]
ENSDARG00000020876	pdk2a	chr12	-	28444506	28456087	protein_coding	pyruvate dehydrogenase kinase, isozyme 2a [Source:ZFIN;Acc:ZDB-GENE-120910-1]
ENSDARG00000075666	tsc22d3	chr14	-	27700651	27703881	protein_coding	TSC22 domain family, member 3 [Source:ZFIN;Acc:ZDB-GENE-040426-1433]
ENSDARG00000077726	nocta	chr14	+	47040711	47054844	protein_coding	nocturnin a [Source:ZFIN;Acc:ZDB-GENE-050208-306]
ENSDARG00000007693	nfkbiab	chr17	+	12788568	12792670	protein_coding	nuclear factor of kappa light polypeptide gene enhancer in B-cells inhibitor, alpha b [Source:ZFIN;Acc:ZDB-GENE-030131-1819]
ENSDARG00000041602	MMADHC (1 of many)	chr22	+	12570367	12579927	protein_coding	zgc:92335 [Source:ZFIN;Acc:ZDB-GENE-040718-152]
ENSDARG00000070393	COQ10A	chr23	-	34008346	34018066	protein_coding	si:dkey-190g6.2 [Source:ZFIN;Acc:ZDB-GENE-090312-30]
ENSDARG00000016360	kpna1	chr24	-	20796941	20812362	protein_coding	karyopherin alpha 1 (importin alpha 5) [Source:ZFIN;Acc:ZDB-GENE-091116-39]
ENSDARG00000099719	cdkn1d	KN149955.1	+	4149	15104	protein_coding	cyclin-dependent kinase inhibitor 1D [Source:ZFIN;Acc:ZDB-GENE-110215-1]
