# Supplementary material for: Accelerated brain aging towards transcriptional inversion in a zebrafish model of the K115fs mutation of human PSEN2
Source: PLoS One. 2020 Jan 24;15(1):e0227258. doi: 10.1371/journal.pone.0227258 (PMC6980398; doi:10.1371/journal.pone.0227258)
Supplement: S10 Table — (XLSX) [file pone.0227258.s011.xlsx]

## Sheet: I_Black
Source	TermID	Term	Enrichment	logP	Genes in Term	Target Genes in Term	Fraction of Targets in Term	Total Target Genes	Total Genes	Entrez Gene IDs	Gene Symbols	AdjustedP
biological_process	GO:0006665	sphingolipid metabolic process	0.00096293	-6.94553	29	6	0.0288462	208	5061	493602,259251,751653,556700,559072,406725	asah2,cers2a,st6galnac4,smpd1,gba,elovl1b	0.0384615
biological_process	GO:0098876	vesicle-mediated transport to the plasma membrane	0.00064367	-7.34832	5	3	0.0144231	208	5061	794778,100004718,114452	pacs2,rilpl2,blzf1	0.0480769

## Sheet: M_Blue
Source	TermID	Term	Enrichment	logP	Genes in Term	Target Genes in Term	Fraction of Targets in Term	Total Target Genes	Total Genes	Entrez Gene IDs	Gene Symbols	AdjustedP
biological_process	GO:0044710	single-organism metabolic process	1.6937e-06	-13.2886	721	104	0.218029	477	5061	568332,325494,566872,560667,406829,541331,326962,30644,558860,393621,58215,553440,80939,402802,378968,555411,100037384,402812,393839,553716,606579,553455,30314,793671,492719,565385,559569,100170827,436880,449926,792266,368327,564379,436624,560915,553510,799954,493608,338306,553672,751628,567414,556315,555271,373125,393321,334161,100037331,447920,394135,352928,723997,100384895,100093705,560896,100…	nars,pars2,l2hgdh,mtrr,far1,ndufa9a,cox5ab,mtmr2,sh2d3ca,ndor1,fech,si:dkey-11e23.4,papss2b,pla2g12a,abat,acer3,ube2j2,pth2,scp2a,b3galnt2,inpp5e,os9,apoeb,csgalnact1a,me3,zgc:172341,egln2,vars2,rnls,iah1,alkbh3,dpy19l1l,cyc1,pdss2,rfk,st8sia3,ddah2,farsb,impdh1b,ndufs2,gpd2,agpat9l,gxylt1b,tmlhe,aifm1,ero1a,alg1,coq2,aldh3a2b,hibadhb,gpx4a,mgst2,ugt2b1,plppr5b,zgc:153343,serp2,amt,fxn,cyb5r4,gmp…	0.0104704
molecular_function	GO:0003824	catalytic activity	1.0926e-05	-11.4244	1884	217	0.467672	464	5028	557109,561724,563257,492783,58215,405899,553787,335709,100037326,553436,799085,492362,556315,559535,492790,449979,373874,558456,321602,393452,798259,100005067,447940,80939,568332,100149182,723997,553653,565342,322648,497562,557893,394188,286745,394181,553440,100384895,406389,791159,797342,100329450,100093705,436749,560667,561160,565385,100037384,100329531,724080,406645,335751,563147,556389,563560…	raf1b,csnk1g2b,lonp1,dhrs13a.3,fech,dip2ba,pop4,atp5d,pnpla4,kif6,abhd6a,klhl12,gxylt1b,dna2,katnal1,kif20ba,ripk2,jarid2b,cdk9,dync2li1,si:ch1073-179p4.3,dguok,adam9,papss2b,nars,ict1,mgst2,amacr,adam19a,serhl,pnkd,lipeb,qars,ddx55,cox15,si:dkey-11e23.4,ugt2b1,atat1,galns,helb,ttc3,plppr5b,polr3h,mtrr,abcc9,zgc:172341,ube2j2,hmox2b,b4galt5,ctsba,cox7a3,prkacbb,fxn,ikbkb,hccsb,pla2g12a,flad1,agbl…	0.0236876
cellular_component	GO:0005739	mitochondrion	8.20747e-05	-9.40788	271	45	0.0980392	459	4882	557907,557469,503880,394157,393860,378968,767662,565271,100009640,445143,326962,556389,100149182,393186,394181,100000992,335751,393277,30068,724009,322648,58215,799085,336553,768305,493605,550367,563257,567309,493604,559535,562149,436779,100037331,798259,436671,58016,564379,492719,322549,325494,406746,335709,406688,567014	yme1l1b,mterf2,mrps35,bcs1l,gcdha,abat,slc25a38a,gper1,mto1,sfxn1,cox5ab,fxn,ict1,zgc:56235,cox15,si:ch211-235e9.6,cox7a3,mrpl45,cat,slc25a47a,serhl,fech,abhd6a,cyb5r1,mrpl21,ndufs1,triap1,lonp1,mrps36,mrpl16,dna2,sdhb,lyrm1,coq2,si:ch1073-179p4.3,mpc1,hccsb,cyc1,me3,uqcrc2b,pars2,fpgs,atp5d,got2a,letmd1	0.0398057
cellular_component	GO:0005746	mitochondrial respiratory chain	0.00011851	-9.04051	14	7	0.0152505	459	4882	564379,326962,562149,335751,100000992,322549,493605	cyc1,cox5ab,sdhb,cox7a3,si:ch211-235e9.6,uqcrc2b,ndufs1	0.0398057
cellular_component	GO:0044429	mitochondrial part	0.00014207	-8.85919	152	29	0.0631808	459	4882	393186,335751,100000992,394181,724009,563257,335709,567309,493604,567014,322549,493605,768305,406746,550367,100037331,394157,559535,557907,562149,557469,503880,445143,326962,564379,100149182,436671,565271,767662	zgc:56235,cox7a3,si:ch211-235e9.6,cox15,slc25a47a,lonp1,atp5d,mrps36,mrpl16,letmd1,uqcrc2b,ndufs1,mrpl21,fpgs,triap1,coq2,bcs1l,dna2,yme1l1b,sdhb,mterf2,mrps35,sfxn1,cox5ab,cyc1,ict1,mpc1,gper1,slc25a38a	0.0398057
cellular_component	GO:0015630	microtubule cytoskeleton	0.00020285	-8.50305	155	29	0.0631808	459	4882	393808,569992,553436,100329274,797406,393148,100170801,567090,406389,386701,570502,386932,415215,564075,449979,436704,447911,494082,569430,562035,432389,561788,565974,393452,568152,561612,556980,492790,321836	ssx2ipa,si:dkeyp-86b9.1,kif6,si:ch73-100l22.3,espl1,cdc14b,rgs19,si:dkey-170l10.1,atat1,tubb5,kif21b,poc1b,fgfr1op,ttll6,kif20ba,rgs20,rsg1,ift80,fbxl7,cep162,ift172,kif22,map9,dync2li1,agbl2,dync1i2b,sdccag8,katnal1,krit1	0.0398057
cellular_component	GO:0070469	respiratory chain	0.000204342	-8.49572	15	7	0.0152505	459	4882	493605,335751,100000992,562149,322549,564379,326962	ndufs1,cox7a3,si:ch211-235e9.6,sdhb,uqcrc2b,cyc1,cox5ab	0.0398057
cellular_component	GO:0005929	cilium	0.000284918	-8.16331	79	18	0.0392157	459	4882	553436,393808,447898,30225,393148,556414,393369,564075,559290,432389,562035,494082,447911,560234,568152,565515,393452,100333716	kif6,ssx2ipa,tmem237b,smo,cdc14b,wdr19,tmem218,ttll6,abhd2b,ift172,cep162,ift80,rsg1,nphp4,agbl2,wdr35,dync2li1,bbs9	0.0404963
cellular_component	GO:0005743	mitochondrial inner membrane	0.000291041	-8.14205	66	16	0.0348584	459	4882	493605,322549,567014,335709,724009,100000992,335751,394181,767662,436671,564379,326962,562149,557907,394157,100037331	ndufs1,uqcrc2b,letmd1,atp5d,slc25a47a,si:ch211-235e9.6,cox7a3,cox15,slc25a38a,mpc1,cyc1,cox5ab,sdhb,yme1l1b,bcs1l,coq2	0.0404963
cellular_component	GO:1990204	oxidoreductase complex	0.000387767	-7.85511	21	8	0.0174292	459	4882	564379,567309,493605,322549,678545,751628,100000992,562149	cyc1,mrps36,ndufs1,uqcrc2b,gmpr2,gpd2,si:ch211-235e9.6,sdhb	0.0472107
cellular_component	GO:0019866	organelle inner membrane	0.000446595	-7.71386	75	17	0.037037	459	4882	564379,326962,368327,767662,436671,394157,100037331,562149,557907,567014,335709,493605,322549,724009,335751,394181,100000992	cyc1,cox5ab,dpy19l1l,slc25a38a,mpc1,bcs1l,coq2,sdhb,yme1l1b,letmd1,atp5d,ndufs1,uqcrc2b,slc25a47a,cox7a3,cox15,si:ch211-235e9.6	0.0483315
msigdb	MOOTHA_HUMAN_MITODB_6_2002	MOOTHA_HUMAN_MITODB_6_2002	1.86925e-07	-15.4926	165	39	0.0752896	518	5159	768119,492719,378968,563257,393186,394157,337784,569980,558758,553653,493604,393860,556389,553713,393839,335751,58215,335709,798073,406688,325712,541331,282677,100005067,562149,450000,553672,557109,394181,373125,170783,406746,564379,503880,322549,493605,558403,751628,58016	cnot7,me3,abat,lonp1,zgc:56235,bcs1l,hlcs,bckdhb,acp6,amacr,mrpl16,gcdha,fxn,clpp,scp2a,cox7a3,fech,atp5d,acot9.1,got2a,ndufab1b,ndufa9a,bckdk,dguok,sdhb,amt,ndufs2,raf1b,cox15,aifm1,mkrn2,fpgs,cyc1,mrps35,uqcrc2b,ndufs1,mutyh,gpd2,hccsb	0.00290233
msigdb	MOOTHA_MITOCHONDRIA	MOOTHA_MITOCHONDRIA	4.65897e-07	-14.5793	164	38	0.0733591	518	5159	406746,564379,170783,322549,503880,394181,557109,553672,373125,450000,562149,30068,58016,751628,557907,493605,393860,493604,556389,553653,393186,558758,569980,394157,492719,768119,563257,378968,282677,325712,100005067,100009640,767662,335709,571044,798073,406688,58215	fpgs,cyc1,mkrn2,uqcrc2b,mrps35,cox15,raf1b,ndufs2,aifm1,amt,sdhb,cat,hccsb,gpd2,yme1l1b,ndufs1,gcdha,mrpl16,fxn,amacr,zgc:56235,acp6,bckdhb,bcs1l,me3,cnot7,lonp1,abat,bckdk,ndufab1b,dguok,mto1,slc25a38a,atp5d,si:dkey-201c1.2,acot9.1,got2a,fech	0.00290233
msigdb	MOOTHA_VOXPHOS	MOOTHA_VOXPHOS	4.85692e-07	-14.5377	27	13	0.0250965	518	5159	335709,394181,553672,394157,493605,562149,768119,335751,564379,325712,541331,322549,559069	atp5d,cox15,ndufs2,bcs1l,ndufs1,sdhb,cnot7,cox7a3,cyc1,ndufab1b,ndufa9a,uqcrc2b,tmco6	0.00290233
msigdb	GO_RESPIRATORY_CHAIN	GO_RESPIRATORY_CHAIN	1.3037e-06	-13.5503	21	11	0.0212355	518	5159	564379,550334,541331,325712,322549,394181,553672,394157,493605,562149,335751	cyc1,higd2a,ndufa9a,ndufab1b,uqcrc2b,cox15,ndufs2,bcs1l,ndufs1,sdhb,cox7a3	0.00584285
msigdb	GO_MITOCHONDRIAL_PART	GO_MITOCHONDRIAL_PART	7.08112e-06	-11.8581	342	60	0.11583	518	5159	564379,406746,503880,322549,394079,321346,553672,557109,394181,373125,567309,445143,450000,562149,394188,566516,751628,58016,30068,799901,555271,557907,571064,493605,100037331,393860,493604,566872,550334,556389,768305,553713,550367,559535,393186,394135,394157,569980,492719,378968,563257,541331,323818,325712,282677,100005067,767662,393277,436624,100330789,571044,335709,325494,724009,406688,798073,…	cyc1,fpgs,mrps35,uqcrc2b,atxn3,phb,ndufs2,raf1b,cox15,aifm1,mrps36,sfxn1,amt,sdhb,qars,mpg,gpd2,hccsb,cat,reep1,tmlhe,yme1l1b,si:dkey-162b23.4,ndufs1,coq2,gcdha,mrpl16,l2hgdh,higd2a,fxn,mrpl21,clpp,triap1,dna2,zgc:56235,hibadhb,bcs1l,bckdhb,me3,abat,lonp1,ndufa9a,shc1,ndufab1b,bckdk,dguok,slc25a38a,mrpl45,pdss2,si:cabz01113374.3,si:dkey-201c1.2,atp5d,pars2,slc25a47a,got2a,acot9.1,letmd1,flad1,fec…	0.0253887
msigdb	GO_MITOCHONDRIAL_MATRIX	GO_MITOCHONDRIAL_MATRIX	1.08983e-05	-11.4269	158	34	0.0656371	518	5159	566516,555271,493605,503880,406746,394079,567309,553672,394188,450000,100005067,282677,325712,541331,323818,798073,406688,325494,335709,436624,100330789,58215,445492,553713,556389,768305,493604,393860,559535,569980,394135,378968,563257,492719	mpg,tmlhe,ndufs1,mrps35,fpgs,atxn3,mrps36,ndufs2,qars,amt,dguok,bckdk,ndufab1b,ndufa9a,shc1,acot9.1,got2a,pars2,atp5d,pdss2,si:cabz01113374.3,fech,flad1,clpp,fxn,mrpl21,mrpl16,gcdha,dna2,bckdhb,hibadhb,abat,lonp1,me3	0.0324656
msigdb	GSE5589_LPS_VS_LPS_AND_IL10_STIM_IL6_KO_MACROPHAGE_45MIN_UP	GSE5589_LPS_VS_LPS_AND_IL10_STIM_IL6_KO_MACROPHAGE_45MIN_UP	1.26769e-05	-11.2757	71	20	0.03861	518	5159	100462714,394188,497562,100333761,322648,100170805,436880,558035,569250,492790,563935,558937,797213,100002010,558990,555271,550512,799085,100005067,406645	qkib,qars,pnkd,spag9b,serhl,xpr1a,rnls,klhl26,ehmt2,katnal1,scn3b,dhx32b,si:ch211-42i9.8,abcc1,fnbp1a,tmlhe,spata6,abhd6a,dguok,ctsba	0.0324656
kegg	ko00190	Oxidative phosphorylation	7.97288e-05	-9.43688	35	12	0.056872	211	2101	541331,564379,493605,562149,326962,335709,553672,335751,325712,322549,100000992,394181	ndufa9a,cyc1,ndufs1,sdhb,cox5ab,atp5d,ndufs2,cox7a3,ndufab1b,uqcrc2b,si:ch211-235e9.6,cox15	0.0257125
kegg	dre00190	Oxidative phosphorylation	7.97288e-05	-9.43688	35	12	0.056872	211	2101	553672,335751,325712,100000992,394181,322549,541331,564379,493605,562149,326962,335709	ndufs2,cox7a3,ndufab1b,si:ch211-235e9.6,cox15,uqcrc2b,ndufa9a,cyc1,ndufs1,sdhb,cox5ab,atp5d	0.0257125

## Sheet: O_Brown
Source	TermID	Term	Enrichment	logP	Genes in Term	Target Genes in Term	Fraction of Targets in Term	Total Target Genes	Total Genes	Entrez Gene IDs	Gene Symbols	AdjustedP
cellular_component	GO:0044444	cytoplasmic part	4.74868e-06	-12.2576	1120	130	0.322581	403	4882	553647,327496,393735,323260,405848,327237,791641,100005158,437014,553529,406386,322857,368632,30381,564177,767796,436784,100004398,563691,450039,100333504,799071,100332265,323607,556136,335810,445157,325875,414930,405806,335894,494085,557828,101885019,553423,317738,563203,393237,373126,266721,449821,415224,100003801,563594,449945,550577,368235,100001531,414929,386636,619253,492340,751649,334757,5…	tma16,mthfd2l,gchfr,gas8,tmed7,ap1s2,cptp,cox11,rnpep,bloc1s3,rabggtb,prom1a,ormdl1,cyp26a1,nrbp2a,ndufaf7,rabif,mettl3,btbd3a,chga,lamtor5,adck4,ap1ar,tmx1,tmem55ba,vps36,lsm1,dgat1a,ift20,hoga1,dnaja3a,pink1,panx2,vopp1,sumf1,elovl6,pex11g,imp3,hif1an,trh,pex10,tmed4,ccsapb,st6galnac5a,pgm2l1,stx6,yars,rab22a,ift57,timm17a,snx1b,cln3,tomm7,sfxn2,rab39ba,prtfdc1,pex19,cisd2,spg7,bpgm,hook1,oxnad…	0.00462521
reactome	R-DRE-5620924	Intraflagellar transport	1.8104e-05	-10.9194	23	9	0.0416667	216	2926	100330581,569823,414930,572690,436658,394163,794361,414931,414929	wdr60,ttc21b,ift20,dynll2b,ift74,dynlrb1,wdr34,ift52,ift57	0.0217762
reactome	R-DRE-73894	DNA Repair	3.16975e-05	-10.3593	118	22	0.101852	216	2926	393443,692127,796934,334081,406487,553789,334669,565276,550263,692256,436837,768122,569495,406845,570205,569525,544655,404206,550258,566079,555714,259256	xpa,fancc,tfpt,rnf168,rad51,tdg.1,polr2c,pms2,polr2h,pold3,gtf2h3,ino80b,wrn,msh2,isy1,lig4,nbn,ccna1,si:dkey-23c22.2,polq,rad51ap1,rfc3	0.0217762

## Sheet: W_Cyan
Source	TermID	Term	Enrichment	logP	Genes in Term	Target Genes in Term	Fraction of Targets in Term	Total Target Genes	Total Genes	Entrez Gene IDs	Gene Symbols	AdjustedP
msigdb	BOQUEST_STEM_CELL_DN	BOQUEST_STEM_CELL_DN	1.01112e-06	-13.8045	74	10	0.102041	98	5159	556979,101885659,447829,393569,565838,353314,794256,334017,559170,553414	abcg1,ssh1a,cdc42ep3,efna1a,adrb2a,dusp6,si:ch211-236d3.4,pla1a,rapgef4,rnd1b	0.0181263
biological_process	GO:0002025	vasodilation by norepinephrine-epinephrine involved in regulation of systemic arterial blood pressure	0.000402286	-7.81835	2	2	0.0196078	102	5061	557194,565838	adrb1,adrb2a	0.0438462
biological_process	GO:0003085	negative regulation of systemic arterial blood pressure	0.000402286	-7.81835	2	2	0.0196078	102	5061	565838,557194	adrb2a,adrb1	0.0438462
biological_process	GO:0001993	regulation of systemic arterial blood pressure by norepinephrine-epinephrine	0.00119095	-6.733	3	2	0.0196078	102	5061	557194,565838	adrb1,adrb2a	0.0438462
biological_process	GO:0042311	vasodilation	0.00119095	-6.733	3	2	0.0196078	102	5061	557194,565838	adrb1,adrb2a	0.0438462
biological_process	GO:0002027	regulation of heart rate	0.00235057	-6.0531	4	2	0.0196078	102	5061	557194,565838	adrb1,adrb2a	0.0492852
					s

## Sheet: P_Darkgreen
Source	TermID	Term	Enrichment	logP	Genes in Term	Target Genes in Term	Fraction of Targets in Term	Total Target Genes	Total Genes	Entrez Gene IDs	Gene Symbols	AdjustedP
biological_process	GO:0007601	visual perception	3.89557e-09	-19.3634	20	7	0.102941	68	5061	554700,555506,550575,100537095,436678,553708,566120	pde6g,abca4b,rgra,aipl1,arr3a,zgc:112320,grk7a	1.78711e-05
biological_process	GO:0050953	sensory perception of light stimulus	5.78165e-09	-18.9686	21	7	0.102941	68	5061	550575,436678,566120,553708,100537095,555506,554700	rgra,arr3a,grk7a,zgc:112320,aipl1,abca4b,pde6g	1.78711e-05
biological_process	GO:0050877	neurological system process	6.83744e-07	-14.1957	57	8	0.117647	68	5061	436678,100537095,553708,566120,550575,795688,554700,555506	arr3a,aipl1,zgc:112320,grk7a,rgra,scn12aa,pde6g,abca4b	0.00140897
biological_process	GO:0007600	sensory perception	1.07332e-06	-13.7448	42	7	0.102941	68	5061	550575,553708,566120,436678,100537095,555506,554700	rgra,zgc:112320,grk7a,arr3a,aipl1,abca4b,pde6g	0.00165882
molecular_function	GO:0030553	cGMP binding	2.3888e-08	-17.5499	4	4	0.0625	64	5028	553708,567242,100001558,554700	zgc:112320,cnga3a,si:dkey-22i16.2,pde6g	5.17891e-05
molecular_function	GO:0004112	cyclic-nucleotide phosphodiesterase activity	2.10918e-07	-15.3718	12	5	0.078125	64	5028	393845,554700,559332,368410,553708	pde6c,pde6g,pde6b,pde6a,zgc:112320	0.000152423
molecular_function	GO:0004114	3',5'-cyclic-nucleotide phosphodiesterase activity	2.10918e-07	-15.3718	12	5	0.078125	64	5028	368410,553708,559332,554700,393845	pde6a,zgc:112320,pde6b,pde6g,pde6c	0.000152423
molecular_function	GO:0030551	cyclic nucleotide binding	8.12349e-07	-14.0233	7	4	0.0625	64	5028	554700,100001558,553708,567242	pde6g,si:dkey-22i16.2,zgc:112320,cnga3a	0.000440293
molecular_function	GO:0008081	phosphoric diester hydrolase activity	4.40681e-05	-10.0298	32	5	0.078125	64	5028	559332,554700,393845,368410,553708	pde6b,pde6g,pde6c,pde6a,zgc:112320	0.0191079
molecular_function	GO:0005223	intracellular cGMP activated cation channel activity	0.00015952	-8.74334	2	2	0.03125	64	5028	100001558,567242	si:dkey-22i16.2,cnga3a	0.034584
molecular_function	GO:0043855	cyclic nucleotide-gated ion channel activity	0.00015952	-8.74334	2	2	0.03125	64	5028	567242,100001558	cnga3a,si:dkey-22i16.2	0.034584
molecular_function	GO:0004510	tryptophan 5-monooxygenase activity	0.00015952	-8.74334	2	2	0.03125	64	5028	352943,407712	tph1a,tph2	0.034584
molecular_function	GO:0005222	intracellular cAMP activated cation channel activity	0.00015952	-8.74334	2	2	0.03125	64	5028	567242,100001558	cnga3a,si:dkey-22i16.2	0.034584
molecular_function	GO:0005221	intracellular cyclic nucleotide activated cation channel activity	0.00015952	-8.74334	2	2	0.03125	64	5028	567242,100001558	cnga3a,si:dkey-22i16.2	0.034584
msigdb	GO_DETECTION_OF_LIGHT_STIMULUS	GO_DETECTION_OF_LIGHT_STIMULUS	6.80824e-23	-51.0413	27	15	0.234375	64	5159	445044,554700,335655,792319,386614,555506,140428,559332,368410,335732,570333,335656,100537095,550575,393845	rs1a,pde6g,gngt2a,saga,pdcb,abca4b,gnat1,pde6b,pde6a,elovl4b,rcvrna,gngt1,aipl1,rgra,pde6c	1.19601e-18
msigdb	GO_PHOTOTRANSDUCTION	GO_PHOTOTRANSDUCTION	1.33431e-22	-50.3685	22	14	0.21875	64	5159	335656,570333,368410,550575,393845,100537095,140428,555506,386614,559332,335655,792319,445044,554700	gngt1,rcvrna,pde6a,rgra,pde6c,aipl1,gnat1,abca4b,pdcb,pde6b,gngt2a,saga,rs1a,pde6g	1.19601e-18
msigdb	GO_SENSORY_PERCEPTION_OF_LIGHT_STIMULUS	GO_SENSORY_PERCEPTION_OF_LIGHT_STIMULUS	1.03498e-21	-48.3199	82	20	0.3125	64	5159	393845,550575,100537095,556528,558299,559332,386614,792319,140426,568982,791149,567242,554700,445044,570333,368410,140428,555506,566120,436678	pde6c,rgra,aipl1,rdh5,slc24a1,pde6b,pdcb,saga,gc3,ush2a,rd3,cnga3a,pde6g,rs1a,rcvrna,pde6a,gnat1,abca4b,grk7a,arr3a	6.18468e-18
msigdb	GO_PHOTOTRANSDUCTION_VISIBLE_LIGHT	GO_PHOTOTRANSDUCTION_VISIBLE_LIGHT	2.68817e-18	-40.4577	12	10	0.15625	64	5159	445044,554700,792319,555506,140428,559332,368410,335656,100537095,393845	rs1a,pde6g,saga,abca4b,gnat1,pde6b,pde6a,gngt1,aipl1,pde6c	1.20477e-14
msigdb	GO_PHOTORECEPTOR_OUTER_SEGMENT	GO_PHOTORECEPTOR_OUTER_SEGMENT	1.31949e-17	-38.8667	32	13	0.203125	64	5159	792319,140426,566120,436678,554700,567242,449008,368410,335656,559332,555506,386614,140428	saga,gc3,grk7a,arr3a,pde6g,cnga3a,cdhr1a,pde6a,gngt1,pde6b,abca4b,pdcb,gnat1	4.73092e-14
msigdb	GO_DETECTION_OF_ABIOTIC_STIMULUS	GO_DETECTION_OF_ABIOTIC_STIMULUS	1.93702e-17	-38.4828	53	15	0.234375	64	5159	140428,555506,386614,559332,570333,335656,368410,335732,550575,393845,100537095,445044,554700,335655,792319	gnat1,abca4b,pdcb,pde6b,rcvrna,gngt1,pde6a,elovl4b,rgra,pde6c,aipl1,rs1a,pde6g,gngt2a,saga	5.7875e-14
msigdb	GO_DETECTION_OF_VISIBLE_LIGHT	GO_DETECTION_OF_VISIBLE_LIGHT	3.05046e-17	-38.0287	19	11	0.171875	64	5159	792319,554700,445044,100537095,393845,368410,335732,335656,559332,555506,140428	saga,pde6g,rs1a,aipl1,pde6c,pde6a,elovl4b,gngt1,pde6b,abca4b,gnat1	7.81224e-14
msigdb	PID_RHODOPSIN_PATHWAY	PID_RHODOPSIN_PATHWAY	7.41595e-15	-32.5351	14	9	0.140625	64	5159	368410,558299,335656,556528,140428,559332,140426,792319,554700	pde6a,slc24a1,gngt1,rdh5,gnat1,pde6b,gc3,saga,pde6g	1.66182e-11
msigdb	GO_SENSORY_PERCEPTION	GO_SENSORY_PERCEPTION	1.03514e-14	-32.2017	178	20	0.3125	64	5159	558299,393845,550575,556528,100537095,386614,559332,568982,791149,140426,792319,445044,567242,554700,570333,368410,140428,555506,436678,566120	slc24a1,pde6c,rgra,rdh5,aipl1,pdcb,pde6b,ush2a,rd3,gc3,saga,rs1a,cnga3a,pde6g,rcvrna,pde6a,gnat1,abca4b,arr3a,grk7a	2.06188e-11
msigdb	GO_NONMOTILE_PRIMARY_CILIUM	GO_NONMOTILE_PRIMARY_CILIUM	2.1597e-14	-31.4662	66	14	0.21875	64	5159	140428,555506,386614,559332,335656,368410,449008,567242,554700,568982,436678,566120,140426,792319	gnat1,abca4b,pdcb,pde6b,gngt1,pde6a,cdhr1a,cnga3a,pde6g,ush2a,arr3a,grk7a,gc3,saga	3.8717e-11
msigdb	GO_RESPONSE_TO_LIGHT_STIMULUS	GO_RESPONSE_TO_LIGHT_STIMULUS	3.67194e-14	-30.9355	102	16	0.25	64	5159	554700,445044,792319,559332,386614,393845,550575,100537095,558299,335655,140428,555506,335656,570333,368410,335732	pde6g,rs1a,saga,pde6b,pdcb,pde6c,rgra,aipl1,slc24a1,gngt2a,gnat1,abca4b,gngt1,rcvrna,pde6a,elovl4b	5.98426e-11
msigdb	GO_DETECTION_OF_STIMULUS	GO_DETECTION_OF_STIMULUS	5.00932e-14	-30.6249	86	15	0.234375	64	5159	792319,335655,554700,445044,100537095,550575,393845,368410,335732,570333,335656,559332,555506,386614,140428	saga,gngt2a,pde6g,rs1a,aipl1,rgra,pde6c,pde6a,elovl4b,rcvrna,gngt1,pde6b,abca4b,pdcb,gnat1	7.48351e-11
msigdb	GO_PHOTORECEPTOR_DISC_MEMBRANE	GO_PHOTORECEPTOR_DISC_MEMBRANE	5.73078e-14	-30.4903	11	8	0.125	64	5159	566120,140426,554700,335656,368410,559332,140428,555506	grk7a,gc3,pde6g,gngt1,pde6a,pde6b,gnat1,abca4b	7.90274e-11
msigdb	GO_REGULATION_OF_RHODOPSIN_MEDIATED_SIGNALING_PATHWAY	GO_REGULATION_OF_RHODOPSIN_MEDIATED_SIGNALING_PATHWAY	1.70262e-13	-29.4014	12	8	0.125	64	5159	559332,140428,335656,368410,554700,566120,140426,792319	pde6b,gnat1,gngt1,pde6a,pde6g,grk7a,gc3,saga	2.1802e-10
msigdb	GO_NEUROLOGICAL_SYSTEM_PROCESS	GO_NEUROLOGICAL_SYSTEM_PROCESS	2.27208e-13	-29.1129	297	23	0.359375	64	5159	791149,568982,140426,792319,445044,554700,567242,558299,556528,100537095,393845,550575,386614,559332,795688,436678,566120,724007,368410,570333,324944,555506,140428	rd3,ush2a,gc3,saga,rs1a,pde6g,cnga3a,slc24a1,rdh5,aipl1,pde6c,rgra,pdcb,pde6b,scn12aa,arr3a,grk7a,stra6,pde6a,rcvrna,magt1,abca4b,gnat1	2.71544e-10
msigdb	GO_RHODOPSIN_MEDIATED_SIGNALING_PATHWAY	GO_RHODOPSIN_MEDIATED_SIGNALING_PATHWAY	2.56064e-13	-28.9933	8	7	0.109375	64	5159	445044,140428,559332,554700,335656,368410,792319	rs1a,gnat1,pde6b,pde6g,gngt1,pde6a,saga	2.86904e-10
msigdb	GO_PRIMARY_CILIUM	GO_PRIMARY_CILIUM	3.22816e-12	-26.4591	93	14	0.21875	64	5159	567242,554700,568982,436678,566120,792319,140426,140428,386614,555506,559332,335656,368410,449008	cnga3a,pde6g,ush2a,arr3a,grk7a,saga,gc3,gnat1,pdcb,abca4b,pde6b,gngt1,pde6a,cdhr1a	3.40419e-09
msigdb	PID_CONE_PATHWAY	PID_CONE_PATHWAY	1.02588e-11	-25.3029	11	7	0.109375	64	5159	566120,393845,556528,140426,436678,335655,567242	grk7a,pde6c,rdh5,gc3,arr3a,gngt2a,cnga3a	1.02172e-08
msigdb	GO_RESPONSE_TO_RADIATION	GO_RESPONSE_TO_RADIATION	2.59158e-11	-24.3762	154	16	0.25	64	5159	555506,140428,368410,335732,570333,335656,335655,559332,386614,100537095,393845,550575,558299,554700,445044,792319	abca4b,gnat1,pde6a,elovl4b,rcvrna,gngt1,gngt2a,pde6b,pdcb,aipl1,pde6c,rgra,slc24a1,pde6g,rs1a,saga	2.36562e-08
msigdb	GO_CILIARY_MEMBRANE	GO_CILIARY_MEMBRANE	2.63917e-11	-24.358	40	10	0.15625	64	5159	449008,368410,335656,559332,555506,140428,140426,566120,554700,567242	cdhr1a,pde6a,gngt1,pde6b,abca4b,gnat1,gc3,grk7a,pde6g,cnga3a	2.36562e-08
msigdb	GO_PHOTORECEPTOR_INNER_SEGMENT	GO_PHOTORECEPTOR_INNER_SEGMENT	5.70305e-10	-21.2848	17	7	0.109375	64	5159	436678,568982,335656,792319,100537095,386614,140428	arr3a,ush2a,gngt1,saga,aipl1,pdcb,gnat1	4.86851e-07
msigdb	GO_SYSTEM_PROCESS	GO_SYSTEM_PROCESS	1.33482e-09	-20.4345	494	24	0.375	64	5159	724007,566188,795688,436678,566120,324944,555506,140428,368410,570333,445044,554700,567242,791149,568982,140426,792319,386614,559332,558299,556528,100537095,550575,393845	stra6,inpp5kb,scn12aa,arr3a,grk7a,magt1,abca4b,gnat1,pde6a,rcvrna,rs1a,pde6g,cnga3a,rd3,ush2a,gc3,saga,pdcb,pde6b,slc24a1,rdh5,aipl1,rgra,pde6c	1.0877e-06
msigdb	GO_CELL_PROJECTION_MEMBRANE	GO_CELL_PROJECTION_MEMBRANE	2.4435e-09	-19.8298	125	13	0.203125	64	5159	555506,140428,559332,368410,335656,449008,554700,566188,567242,568982,336063,140426,566120	abca4b,gnat1,pde6b,pde6a,gngt1,cdhr1a,pde6g,inpp5kb,cnga3a,ush2a,arf6a,gc3,grk7a	1.90455e-06
msigdb	GO_CILIUM	GO_CILIUM	2.98412e-09	-19.63	181	15	0.234375	64	5159	559332,140428,321793,555506,386614,449008,335656,368410,567242,554700,566120,792319,140426,436678,568982	pde6b,gnat1,ak2,abca4b,pdcb,cdhr1a,gngt1,pde6a,cnga3a,pde6g,grk7a,saga,gc3,arr3a,ush2a	2.22901e-06
msigdb	CRX_DN.V1_UP	CRX_DN.V1_UP	6.55127e-09	-18.8436	50	9	0.140625	64	5159	724007,445044,556528,550575,368410,558299,570333,555506,140428	stra6,rs1a,rdh5,rgra,pde6a,slc24a1,rcvrna,abca4b,gnat1	4.69778e-06
msigdb	GO_NEURON_PART	GO_NEURON_PART	7.18631e-09	-18.7511	492	23	0.359375	64	5159	555506,403020,100009626,140428,368410,335656,566188,407712,387530,336060,566120,436678,559332,386614,100537095,449008,565776,554700,352943,567242,140426,792319,568982	abca4b,smarcc1a,sv2ba,gnat1,pde6a,gngt1,inpp5kb,tph2,ahcy,sema6a,grk7a,arr3a,pde6b,pdcb,aipl1,cdhr1a,slc6a2,pde6g,tph1a,cnga3a,gc3,saga,ush2a	4.95496e-06
msigdb	GO_CILIARY_PART	GO_CILIARY_PART	2.97725e-08	-17.3297	126	12	0.1875	64	5159	568982,566120,140426,567242,554700,335656,368410,449008,140428,321793,555506,559332	ush2a,grk7a,gc3,cnga3a,pde6g,gngt1,pde6a,cdhr1a,gnat1,ak2,abca4b,pde6b	1.97678e-05
msigdb	MODULE_287	MODULE_287	6.86871e-08	-16.4937	19	6	0.09375	64	5159	140426,568982,368410,567242,559332,445044	gc3,ush2a,pde6a,cnga3a,pde6b,rs1a	4.39769e-05
msigdb	GO_REGULATION_OF_G_PROTEIN_COUPLED_RECEPTOR_PROTEIN_SIGNALING_PATHWAY	GO_REGULATION_OF_G_PROTEIN_COUPLED_RECEPTOR_PROTEIN_SIGNALING_PATHWAY	1.08257e-07	-16.0388	49	8	0.125	64	5159	792319,140426,566120,554700,368410,335656,559332,140428	saga,gc3,grk7a,pde6g,pde6a,gngt1,pde6b,gnat1	6.69216e-05
msigdb	GO_CELLULAR_RESPONSE_TO_LIGHT_STIMULUS	GO_CELLULAR_RESPONSE_TO_LIGHT_STIMULUS	3.01687e-07	-15.0139	38	7	0.109375	64	5159	792319,335656,368410,559332,554700,445044,140428	saga,gngt1,pde6a,pde6b,pde6g,rs1a,gnat1	0.000180278
msigdb	GO_RESPONSE_TO_ABIOTIC_STIMULUS	GO_RESPONSE_TO_ABIOTIC_STIMULUS	1.04472e-06	-13.7718	404	18	0.28125	64	5159	140428,555506,570333,335656,368410,335732,724007,387530,335655,559332,386614,393845,550575,100537095,558299,554700,445044,792319	gnat1,abca4b,rcvrna,gngt1,pde6a,elovl4b,stra6,ahcy,gngt2a,pde6b,pdcb,pde6c,rgra,aipl1,slc24a1,pde6g,rs1a,saga	0.000604151
msigdb	GO_3_5_CYCLIC_GMP_PHOSPHODIESTERASE_ACTIVITY	GO_3_5_CYCLIC_GMP_PHOSPHODIESTERASE_ACTIVITY	1.45324e-06	-13.4417	8	4	0.0625	64	5159	554700,559332,393845,368410	pde6g,pde6b,pde6c,pde6a	0.000814133
msigdb	MODULE_248	MODULE_248	3.18431e-06	-12.6573	53	7	0.109375	64	5159	568982,570333,368410,140426,445044,567242,559332	ush2a,rcvrna,pde6a,gc3,rs1a,cnga3a,pde6b	0.00172985
msigdb	GO_RESPONSE_TO_EXTERNAL_STIMULUS	GO_RESPONSE_TO_EXTERNAL_STIMULUS	3.81614e-06	-12.4763	587	21	0.328125	64	5159	386614,559332,100537095,791163,393845,550575,445044,554700,792319,555506,140428,368410,335732,570333,335656,387530,724007,336060,407712,335655,571943	pdcb,pde6b,aipl1,cmtm8b,pde6c,rgra,rs1a,pde6g,saga,abca4b,gnat1,pde6a,elovl4b,rcvrna,gngt1,ahcy,stra6,sema6a,tph2,gngt2a,lhx4	0.00201212
msigdb	GO_CELLULAR_RESPONSE_TO_RADIATION	GO_CELLULAR_RESPONSE_TO_RADIATION	5.91637e-06	-12.0378	58	7	0.109375	64	5159	335656,368410,792319,140428,445044,559332,554700	gngt1,pde6a,saga,gnat1,rs1a,pde6b,pde6g	0.00303036
msigdb	GO_CYCLIC_NUCLEOTIDE_PHOSPHODIESTERASE_ACTIVITY	GO_CYCLIC_NUCLEOTIDE_PHOSPHODIESTERASE_ACTIVITY	6.66161e-06	-11.9191	11	4	0.0625	64	5159	393845,368410,559332,554700	pde6c,pde6a,pde6b,pde6g	0.0033173
msigdb	GO_CELL_PROJECTION	GO_CELL_PROJECTION	8.1223e-06	-11.7209	668	22	0.34375	64	5159	407712,566188,336060,387530,566120,436678,140428,321793,555506,335656,368410,567242,352943,554700,140426,792319,568982,336063,559332,386614,449008,565776	tph2,inpp5kb,sema6a,ahcy,grk7a,arr3a,gnat1,ak2,abca4b,gngt1,pde6a,cnga3a,tph1a,pde6g,gc3,saga,ush2a,arf6a,pde6b,pdcb,cdhr1a,slc6a2	0.00393537
msigdb	ST_WNT_CA2_CYCLIC_GMP_PATHWAY	ST_WNT_CA2_CYCLIC_GMP_PATHWAY	9.89953e-06	-11.523	12	4	0.0625	64	5159	559332,554700,393845,368410	pde6b,pde6g,pde6c,pde6a	0.00467023
msigdb	GO_PLASMA_MEMBRANE_REGION	GO_PLASMA_MEMBRANE_REGION	1.07634e-05	-11.4394	338	15	0.234375	64	5159	566188,406578,554700,567242,795688,336063,568982,140426,566120,555506,140428,559332,368410,335656,449008	inpp5kb,stxbp2,pde6g,cnga3a,scn12aa,arf6a,ush2a,gc3,grk7a,abca4b,gnat1,pde6b,pde6a,gngt1,cdhr1a	0.00494758
msigdb	GO_CGMP_BINDING	GO_CGMP_BINDING	1.78949e-05	-10.931	5	3	0.046875	64	5159	567242,554700,393845	cnga3a,pde6g,pde6c	0.00782442
msigdb	GO_INDOLALKYLAMINE_METABOLIC_PROCESS	GO_INDOLALKYLAMINE_METABOLIC_PROCESS	1.78949e-05	-10.931	5	3	0.046875	64	5159	352943,407712,100141344	tph1a,tph2,asmt	0.00782442
msigdb	GO_EYE_DEVELOPMENT	GO_EYE_DEVELOPMENT	4.02294e-05	-10.1209	137	9	0.140625	64	5159	406247,335656,393845,555969,140428,559332,791149,445044,724007	gdf11,gngt1,pde6c,lpcat1,gnat1,pde6b,rd3,rs1a,stra6	0.0171712
msigdb	REACTOME_PLATELET_HOMEOSTASIS	REACTOME_PLATELET_HOMEOSTASIS	4.55401e-05	-9.99692	33	5	0.078125	64	5159	335656,368410,335655,559332,554700	gngt1,pde6a,gngt2a,pde6b,pde6g	0.0189824
msigdb	GO_EYE_MORPHOGENESIS	GO_EYE_MORPHOGENESIS	4.65904e-05	-9.97412	54	6	0.09375	64	5159	393845,335656,406247,445044,140428,724007	pde6c,gngt1,gdf11,rs1a,gnat1,stra6	0.0189824
msigdb	GO_AMINE_BIOSYNTHETIC_PROCESS	GO_AMINE_BIOSYNTHETIC_PROCESS	6.15267e-05	-9.69604	7	3	0.046875	64	5159	100141344,407712,352943	asmt,tph2,tph1a	0.023978
msigdb	GO_PHOTORECEPTOR_OUTER_SEGMENT_MEMBRANE	GO_PHOTORECEPTOR_OUTER_SEGMENT_MEMBRANE	6.15267e-05	-9.69604	7	3	0.046875	64	5159	449008,567242,140428	cdhr1a,cnga3a,gnat1	0.023978
msigdb	REACTOME_CGMP_EFFECTS	REACTOME_CGMP_EFFECTS	9.75708e-05	-9.23493	8	3	0.046875	64	5159	368410,559332,554700	pde6a,pde6b,pde6g	0.037216
msigdb	GO_CELL_PROJECTION_PART	GO_CELL_PROJECTION_PART	0.000103018	-9.18061	362	14	0.21875	64	5159	555506,321793,140428,559332,368410,335656,449008,566188,554700,567242,336063,568982,140426,566120	abca4b,ak2,gnat1,pde6b,pde6a,gngt1,cdhr1a,inpp5kb,pde6g,cnga3a,arf6a,ush2a,gc3,grk7a	0.038475
msigdb	GO_G_PROTEIN_COUPLED_RECEPTOR_SIGNALING_PATHWAY	GO_G_PROTEIN_COUPLED_RECEPTOR_SIGNALING_PATHWAY	0.000112129	-9.09586	233	11	0.171875	64	5159	368410,335656,550575,386614,140428,559332,335655,792319,445044,554700,566188	pde6a,gngt1,rgra,pdcb,gnat1,pde6b,gngt2a,saga,rs1a,pde6g,inpp5kb	0.0410231
msigdb	GO_RETINA_DEVELOPMENT_IN_CAMERA_TYPE_EYE	GO_RETINA_DEVELOPMENT_IN_CAMERA_TYPE_EYE	0.000122782	-9.0051	64	6	0.09375	64	5159	393845,555969,791149,559332,140428,445044	pde6c,lpcat1,rd3,pde6b,gnat1,rs1a	0.0440221
msigdb	GO_MEMBRANE_REGION	GO_MEMBRANE_REGION	0.000126647	-8.97411	417	15	0.234375	64	5159	449008,368410,335656,559332,555506,140428,140426,566120,795688,336063,568982,566188,406578,554700,567242	cdhr1a,pde6a,gngt1,pde6b,abca4b,gnat1,gc3,grk7a,scn12aa,arf6a,ush2a,inpp5kb,stxbp2,pde6g,cnga3a	0.0445177
msigdb	GO_INDOLE_CONTAINING_COMPOUND_METABOLIC_PROCESS	GO_INDOLE_CONTAINING_COMPOUND_METABOLIC_PROCESS	0.00014506	-8.83836	9	3	0.046875	64	5159	352943,407712,100141344	tph1a,tph2,asmt	0.049066
msigdb	KEGG_OLFACTORY_TRANSDUCTION	KEGG_OLFACTORY_TRANSDUCTION	0.00014506	-8.83836	9	3	0.046875	64	5159	140426,567242,386614	gc3,cnga3a,pdcb	0.049066
reactome	R-DRE-2187338	Visual phototransduction	4.61223e-18	-39.9178	28	13	0.309524	42	2926	100001558,792319,724007,566120,555506,554700,140428,556528,140426,368410,335656,559332,570333	si:dkey-22i16.2,saga,stra6,grk7a,abca4b,pde6g,gnat1,rdh5,gc3,pde6a,gngt1,pde6b,rcvrna	6.3372e-15
reactome	R-DRE-2514859	Inactivation, recovery and regulation of the phototransduction cascade	8.88858e-16	-34.6566	16	10	0.238095	42	2926	100001558,792319,566120,140428,554700,140426,368410,570333,335656,559332	si:dkey-22i16.2,saga,grk7a,gnat1,pde6g,gc3,pde6a,rcvrna,gngt1,pde6b	6.10645e-13
reactome	R-DRE-2514856	The phototransduction cascade	2.13709e-15	-33.7793	17	10	0.238095	42	2926	368410,140426,570333,559332,335656,792319,100001558,566120,140428,554700	pde6a,gc3,rcvrna,pde6b,gngt1,saga,si:dkey-22i16.2,grk7a,gnat1,pde6g	9.78787e-13
reactome	R-DRE-2485179	Activation of the phototransduction cascade	4.18995e-11	-23.8957	7	6	0.142857	42	2926	100001558,140428,554700,559332,335656,368410	si:dkey-22i16.2,gnat1,pde6g,pde6b,gngt1,pde6a	1.43925e-08
reactome	R-DRE-209931	Serotonin and melatonin biosynthesis	2.75243e-06	-12.803	3	3	0.0714286	42	2926	100141344,352943,407712	asmt,tph1a,tph2	0.000756367
reactome	R-DRE-2453902	The canonical retinoid cycle in rods (twilight vision)	9.25386e-05	-9.28788	7	3	0.0714286	42	2926	556528,555506,724007	rdh5,abca4b,stra6	0.018164
reactome	R-DRE-209776	Amine-derived hormones	9.25386e-05	-9.28788	7	3	0.0714286	42	2926	100141344,407712,352943	asmt,tph2,tph1a	0.018164
kegg	ko04744	Phototransduction	8.03914e-17	-37.0596	13	10	0.294118	34	2101	368410,554700,570333,559332,140428,792319,566120,335656,558299,140426	pde6a,pde6g,rcvrna,pde6b,gnat1,saga,grk7a,gngt1,slc24a1,gc3	2.59262e-14
kegg	dre04744	Phototransduction	8.03914e-17	-37.0596	13	10	0.294118	34	2101	559332,368410,554700,570333,558299,140426,566120,792319,140428,335656	pde6b,pde6a,pde6g,rcvrna,slc24a1,gc3,grk7a,saga,gnat1,gngt1	2.59262e-14
kegg	dre_M00037	Melatonin biosynthesis, tryptophan => serotonin => melatonin	3.8769e-06	-12.4605	3	3	0.0882353	34	2101	352943,407712,100141344	tph1a,tph2,asmt	0.000625151
kegg	M00037	Melatonin biosynthesis, tryptophan => serotonin => melatonin	3.8769e-06	-12.4605	3	3	0.0882353	34	2101	100141344,407712,352943	asmt,tph2,tph1a	0.000625151
kegg	dre00230	Purine metabolism	6.53679e-05	-9.63548	91	8	0.235294	34	2101	321793,393845,140426,393697,445069,554700,368410,559332	ak2,pde6c,gc3,guk1b,ntpcr,pde6g,pde6a,pde6b	0.00702704
kegg	ko00230	Purine metabolism	6.53679e-05	-9.63548	91	8	0.235294	34	2101	140426,393697,445069,321793,393845,554700,368410,559332	gc3,guk1b,ntpcr,ak2,pde6c,pde6g,pde6a,pde6b	0.00702704
prosite	PS00126	PDEASE_I	9.32289e-05	-9.28045	8	3	0.0638298	47	3826	368410,559332,393845	pde6a,pde6b,pde6c	0.0449849
prosite	PS51671	ACT	0.000147734	-8.8201	2	2	0.0425532	47	3826	352943,407712	tph1a,tph2	0.0449849
prosite	PS51410	BH4_AAA_HYDROXYL_2	0.000147734	-8.8201	2	2	0.0425532	47	3826	407712,352943	tph2,tph1a	0.0449849
prosite	PS00367	BH4_AAA_HYDROXYL_1	0.000147734	-8.8201	2	2	0.0425532	47	3826	352943,407712	tph1a,tph2	0.0449849

## Sheet: A_Darkred
Source	TermID	Term	Enrichment	logP	Genes in Term	Target Genes in Term	Fraction of Targets in Term	Total Target Genes	Total Genes	Entrez Gene IDs	Gene Symbols	AdjustedP

## Sheet: H_Darkturquoise
Source	TermID	Term	Enrichment	logP	Genes in Term	Target Genes in Term	Fraction of Targets in Term	Total Target Genes	Total Genes	Entrez Gene IDs	Gene Symbols	AdjustedP
msigdb	GO_REGULATION_OF_SYNAPTIC_PLASTICITY	GO_REGULATION_OF_SYNAPTIC_PLASTICITY	1.81881e-06	-13.2173	59	7	0.132075	53	5159	569861,798689,571349,336281,360144,562521,568618	jph3,gria1a,cntn4,vamp2,mapk1,sipa1l1,si:dkey-110c1.7	0.0147148
msigdb	GO_SYNAPSE_PART	GO_SYNAPSE_PART	1.83879e-06	-13.2064	224	12	0.226415	53	5159	564081,568618,555837,336281,324467,100334962,798689,564728,494492,559976,562521,567621	dlg3,si:dkey-110c1.7,cttnbp2,vamp2,scamp5a,hrh4,gria1a,baiap3,slc17a6a,grin2bb,sipa1l1,tiam1a	0.0147148
msigdb	GO_REGULATION_OF_SYNAPSE_STRUCTURE_OR_ACTIVITY	GO_REGULATION_OF_SYNAPSE_STRUCTURE_OR_ACTIVITY	2.46246e-06	-12.9144	88	8	0.150943	53	5159	58118,568618,569861,798689,336281,360144,571349,562521	bdnf,si:dkey-110c1.7,jph3,gria1a,vamp2,mapk1,cntn4,sipa1l1	0.0147148
msigdb	GO_SYNAPTIC_SIGNALING	GO_SYNAPTIC_SIGNALING	6.62623e-06	-11.9245	170	10	0.188679	53	5159	559976,564728,100334962,336281,436920,360144,798689,678653,568618,564081	grin2bb,baiap3,hrh4,vamp2,egr3,mapk1,gria1a,unc119b,si:dkey-110c1.7,dlg3	0.0296971
msigdb	REACTOME_ERKS_ARE_INACTIVATED	REACTOME_ERKS_ARE_INACTIVATED	1.00941e-05	-11.5036	5	3	0.0566038	53	5159	393885,360144,394146	zgc:56064,mapk1,dusp4	0.0361913
msigdb	GO_PRESYNAPSE	GO_PRESYNAPSE	1.50898e-05	-11.1015	112	8	0.150943	53	5159	494492,564728,568618,555837,798689,324467,336281,100334962	slc17a6a,baiap3,si:dkey-110c1.7,cttnbp2,gria1a,scamp5a,vamp2,hrh4	0.0410981
msigdb	GO_SYNAPSE	GO_SYNAPSE	1.60477e-05	-11.0399	276	12	0.226415	53	5159	100334962,324467,336281,798689,568618,564081,555837,559976,562521,567621,564728,494492	hrh4,scamp5a,vamp2,gria1a,si:dkey-110c1.7,dlg3,cttnbp2,grin2bb,sipa1l1,tiam1a,baiap3,slc17a6a	0.0410981

## Sheet: X_Green
Source	TermID	Term	Enrichment	logP	Genes in Term	Target Genes in Term	Fraction of Targets in Term	Total Target Genes	Total Genes	Entrez Gene IDs	Gene Symbols	AdjustedP
biological_process	GO:0007186	G-protein coupled receptor signaling pathway	1.99341e-07	-15.4282	182	27	0.10757	251	5061	567289,559201,798737,568726,100332913,100334518,101885360,564928,30281,541315,557645,30442,81886,266752,793299,336153,569382,100003539,368421,568269,100002786,101882850,562111,735302,557026,100149100,404209	grpr,tacr3l,galr2b,adcy7,grm5b,si:zfos-169g10.2,gipr,gpr26,npy,adcyap1r1a,sstr1b,ednrba,vipr2,adra2c,gpr85,grm2a,trhrb,tacr1a,gpr161,htr6,si:dkey-27p18.2,htr4,htr7a,hrh1,adcy1a,adra1ba,cnr1	0.00123233
biological_process	GO:0050789	regulation of biological process	7.32746e-06	-11.8239	2043	135	0.537849	251	5061	557278,798433,492802,266752,560566,559201,405902,405896,100003330,735302,557026,100149100,567762,403310,327572,336153,102216265,81883,58042,559888,100150304,550345,550436,60658,560140,324481,101882850,404209,30161,445199,553778,326672,566115,393428,564589,378959,569090,368421,30281,553266,336625,368266,793299,497616,436925,387532,406517,30274,565579,723994,445565,565643,394145,567234,449830,56492…	ppp1r13bb,syt9a,rhoua,adra2c,gem,tacr3l,nrp2b,sp9,mrap2a,hrh1,adcy1a,adra1ba,myclb,cacna1da,rasgef1ba,grm2a,sox8a,nkx2.1,tbr1b,plppr4a,gucy1b3,syt13,camk2a,nos1,adipor2,clic1,htr4,cnr1,chd,cks1b,rab23,ets2,si:dkey-81e3.1,plppr2a,batf,lhx8a,ngef,gpr161,npy,arrb1,txndc9,arhgef1a,gpr85,numbl,cacnb1,pbx3a,ilf2,foxg1a,tspan3a,crb2a,lhx6,kcng3,vrk2,lrmp,jagn1a,gpr26,sgsm1a,rab27b,rapgefl1,npas2,asf1bb,…	0.0226492
molecular_function	GO:0004930	G-protein coupled receptor activity	4.82176e-08	-16.8475	137	24	0.0952381	252	5028	100003539,100149100,567289,101885360,368421,336153,557645,798737,100002786,559201,793299,404209,100332913,81886,569382,30442,100334518,564928,562111,101882850,541315,568269,735302,266752	tacr1a,adra1ba,grpr,gipr,gpr161,grm2a,sstr1b,galr2b,si:dkey-27p18.2,tacr3l,gpr85,cnr1,grm5b,vipr2,trhrb,ednrba,si:zfos-169g10.2,gpr26,htr7a,htr4,adcyap1r1a,htr6,hrh1,adra2c	0.000104536
molecular_function	GO:0004888	transmembrane signaling receptor activity	3.47423e-06	-12.5701	245	30	0.119048	252	5028	564928,562111,100334518,30442,569382,266752,735302,568269,101882850,541315,30742,404209,793299,100150704,559201,81886,100332913,798577,405902,557645,798737,170451,336153,368421,101885360,100002786,100003539,567289,100149100,407651	gpr26,htr7a,si:zfos-169g10.2,ednrba,trhrb,adra2c,hrh1,htr6,htr4,adcyap1r1a,bmpr1ba,cnr1,gpr85,si:dkey-52k1.6,tacr3l,vipr2,grm5b,ntrk3b,nrp2b,sstr1b,galr2b,gria2b,grm2a,gpr161,gipr,si:dkey-27p18.2,tacr1a,grpr,adra1ba,prlra	0.00376607
molecular_function	GO:0099600	transmembrane receptor activity	9.27762e-06	-11.5879	257	30	0.119048	252	5028	798737,557645,405902,101885360,368421,170451,336153,100002786,100003539,567289,100149100,407651,30442,100334518,562111,564928,569382,735302,266752,568269,541315,101882850,404209,793299,30742,559201,100150704,81886,798577,100332913	galr2b,sstr1b,nrp2b,gipr,gpr161,gria2b,grm2a,si:dkey-27p18.2,tacr1a,grpr,adra1ba,prlra,ednrba,si:zfos-169g10.2,htr7a,gpr26,trhrb,hrh1,adra2c,htr6,adcyap1r1a,htr4,cnr1,gpr85,bmpr1ba,tacr3l,si:dkey-52k1.6,vipr2,ntrk3b,grm5b	0.00579965
molecular_function	GO:0008188	neuropeptide receptor activity	1.07005e-05	-11.4452	12	6	0.0238095	252	5028	559201,100334518,100003539,798737,557645,100002786	tacr3l,si:zfos-169g10.2,tacr1a,galr2b,sstr1b,si:dkey-27p18.2	0.00579965
molecular_function	GO:0022836	gated channel activity	1.84284e-05	-10.9016	107	17	0.0674603	252	5028	559728,393890,170451,324481,405763,403310,570138,563904,559340,436925,570401,100334378,100150704,565643,563670,799410,559447	kcnk2a,panx1a,gria2b,clic1,kcnh6a,cacna1da,kcnn3,cacna1g,clcn3,cacnb1,kcnn1b,kcnf1b,si:dkey-52k1.6,kcng3,si:dkey-21e5.1,kcnc4,scn1lab	0.00735857
molecular_function	GO:0015267	channel activity	2.37592e-05	-10.6475	143	20	0.0793651	252	5028	559340,436925,84040,563904,570138,333987,403310,100334378,570401,102725536,565643,100150704,559447,799410,563670,170451,559728,393890,324481,405763	clcn3,cacnb1,clic3,cacna1g,kcnn3,fxyd6,cacna1da,kcnf1b,kcnn1b,trpc4b,kcng3,si:dkey-52k1.6,scn1lab,kcnc4,si:dkey-21e5.1,gria2b,kcnk2a,panx1a,clic1,kcnh6a	0.00735857
molecular_function	GO:0022803	passive transmembrane transporter activity	2.37592e-05	-10.6475	143	20	0.0793651	252	5028	799410,559447,563670,565643,100150704,100334378,570401,102725536,84040,563904,436925,559340,333987,403310,570138,405763,324481,393890,559728,170451	kcnc4,scn1lab,si:dkey-21e5.1,kcng3,si:dkey-52k1.6,kcnf1b,kcnn1b,trpc4b,clic3,cacna1g,cacnb1,clcn3,fxyd6,cacna1da,kcnn3,kcnh6a,clic1,panx1a,kcnk2a,gria2b	0.00735857
molecular_function	GO:0005216	ion channel activity	3.14124e-05	-10.3683	134	19	0.0753968	252	5028	405763,324481,559728,170451,559447,799410,563670,565643,100150704,100334378,102725536,570401,563904,84040,559340,436925,403310,333987,570138	kcnh6a,clic1,kcnk2a,gria2b,scn1lab,kcnc4,si:dkey-21e5.1,kcng3,si:dkey-52k1.6,kcnf1b,trpc4b,kcnn1b,cacna1g,clic3,clcn3,cacnb1,cacna1da,fxyd6,kcnn3	0.00851275
molecular_function	GO:0022838	substrate-specific channel activity	4.30568e-05	-10.053	137	19	0.0753968	252	5028	570401,102725536,100334378,403310,333987,570138,84040,563904,436925,559340,563670,799410,559447,100150704,565643,559728,170451,405763,324481	kcnn1b,trpc4b,kcnf1b,cacna1da,fxyd6,kcnn3,clic3,cacna1g,cacnb1,clcn3,si:dkey-21e5.1,kcnc4,scn1lab,si:dkey-52k1.6,kcng3,kcnk2a,gria2b,kcnh6a,clic1	0.00999868
molecular_function	GO:0022832	voltage-gated channel activity	4.61194e-05	-9.98428	72	13	0.0515873	252	5028	565643,324481,799410,559447,405763,393890,403310,559728,170451,563904,559340,436925,100334378	kcng3,clic1,kcnc4,scn1lab,kcnh6a,panx1a,cacna1da,kcnk2a,gria2b,cacna1g,clcn3,cacnb1,kcnf1b	0.00999868
molecular_function	GO:0038023	signaling receptor activity	6.09184e-05	-9.70598	283	30	0.119048	252	5028	404209,793299,30742,559201,100150704,81886,798577,100332913,100334518,30442,562111,564928,569382,266752,735302,541315,568269,101882850,100003539,567289,407651,100149100,557645,798737,405902,368421,101885360,170451,336153,100002786	cnr1,gpr85,bmpr1ba,tacr3l,si:dkey-52k1.6,vipr2,ntrk3b,grm5b,si:zfos-169g10.2,ednrba,htr7a,gpr26,trhrb,adra2c,hrh1,adcyap1r1a,htr6,htr4,tacr1a,grpr,prlra,adra1ba,sstr1b,galr2b,nrp2b,gpr161,gipr,gria2b,grm2a,si:dkey-27p18.2	0.0120065
molecular_function	GO:0016628	oxidoreductase activity, acting on the CH-CH group of donors, NAD or NADP as acceptor	0.000109512	-9.11947	11	5	0.0198413	252	5028	550550,494054,405829,767661,560717	mecr,tm7sf2,dpydb,blvra,srd5a3	0.0197852
molecular_function	GO:0008528	G-protein coupled peptide receptor activity	0.000131099	-8.93956	32	8	0.031746	252	5028	100334518,557645,798737,30442,100002786,559201,100003539,567289	si:zfos-169g10.2,sstr1b,galr2b,ednrba,si:dkey-27p18.2,tacr3l,tacr1a,grpr	0.0218632
molecular_function	GO:0005244	voltage-gated ion channel activity	0.000152601	-8.78768	70	12	0.047619	252	5028	324481,565643,405763,799410,559447,170451,559728,403310,436925,559340,563904,100334378	clic1,kcng3,kcnh6a,kcnc4,scn1lab,gria2b,kcnk2a,cacna1da,cacnb1,clcn3,cacna1g,kcnf1b	0.0236314
molecular_function	GO:0001653	peptide receptor activity	0.000165653	-8.70562	33	8	0.031746	252	5028	567289,559201,100003539,100002786,798737,100334518,557645,30442	grpr,tacr3l,tacr1a,si:dkey-27p18.2,galr2b,si:zfos-169g10.2,sstr1b,ednrba	0.0239424
molecular_function	GO:0004872	receptor activity	0.000266195	-8.23128	336	32	0.126984	252	5028	100003539,407651,100149100,567289,170451,101885360,30742,100332913,564928,541315,100148042,266752,336153,368421,405902,557645,798737,100002786,100150704,559201,793299,404209,566809,798577,81886,569382,562111,30442,100334518,568269,101882850,735302	tacr1a,prlra,adra1ba,grpr,gria2b,gipr,bmpr1ba,grm5b,gpr26,adcyap1r1a,tmprss15,adra2c,grm2a,gpr161,nrp2b,sstr1b,galr2b,si:dkey-27p18.2,si:dkey-52k1.6,tacr3l,gpr85,cnr1,prss12,ntrk3b,vipr2,trhrb,htr7a,ednrba,si:zfos-169g10.2,htr6,htr4,hrh1	0.0339476
molecular_function	GO:0060089	molecular transducer activity	0.000266195	-8.23128	336	32	0.126984	252	5028	100003539,567289,407651,100149100,170451,101885360,30742,100332913,564928,266752,541315,100148042,405902,557645,798737,336153,368421,100002786,404209,793299,100150704,559201,81886,566809,798577,562111,30442,100334518,569382,735302,568269,101882850	tacr1a,grpr,prlra,adra1ba,gria2b,gipr,bmpr1ba,grm5b,gpr26,adra2c,adcyap1r1a,tmprss15,nrp2b,sstr1b,galr2b,grm2a,gpr161,si:dkey-27p18.2,cnr1,gpr85,si:dkey-52k1.6,tacr3l,vipr2,prss12,ntrk3b,htr7a,ednrba,si:zfos-169g10.2,trhrb,hrh1,htr6,htr4	0.0339476
molecular_function	GO:0008227	G-protein coupled amine receptor activity	0.000319309	-8.04935	20	6	0.0238095	252	5028	562111,100149100,568269,101882850,266752,735302	htr7a,adra1ba,htr6,htr4,adra2c,hrh1	0.0371686
molecular_function	GO:0005261	cation channel activity	0.00032574	-8.02941	98	14	0.0555556	252	5028	563670,405763,559447,799410,565643,570401,102725536,100334378,170451,570138,559728,403310,436925,563904	si:dkey-21e5.1,kcnh6a,scn1lab,kcnc4,kcng3,kcnn1b,trpc4b,kcnf1b,gria2b,kcnn3,kcnk2a,cacna1da,cacnb1,cacna1g	0.0371686
cellular_component	GO:0016021	integral component of membrane	2.90545e-05	-10.4463	1612	107	0.455319	235	4882	798577,568765,556922,564928,327065,564052,100149100,562918,449830,100003539,541315,266752,393890,557185,678623,100334518,556369,793299,560717,333987,170451,569382,393577,100150704,394067,405763,559201,405902,568726,797166,570138,101882850,100006090,799410,550420,325033,569667,550436,394145,570401,30221,560140,100003330,100332913,497102,541397,102725536,567234,550369,562409,352937,559728,100136870…	ntrk3b,cyb561,neto1,gpr26,rtn1b,lingo2b,adra1ba,si:dkeyp-59a8.4,jagn1a,tacr1a,adcyap1r1a,adra2c,panx1a,slc25a35,slc11a2,si:zfos-169g10.2,tmem200a,gpr85,srd5a3,fxyd6,gria2b,trhrb,cisd1,si:dkey-52k1.6,ykt6,kcnh6a,tacr3l,nrp2b,adcy7,si:dkey-11o18.5,kcnn3,htr4,abca2,kcnc4,gucy1a3,ptprn2,zdhhc14,camk2a,vrk2,kcnn1b,psen1,adipor2,mrap2a,grm5b,xkr5,cnih2,trpc4b,lrmp,nsdhl,si:ch211-198g19.1,dio2,kcnk2a,cl…	0.0213947
cellular_component	GO:0031224	intrinsic component of membrane	4.39315e-05	-10.0329	1626	107	0.455319	235	4882	100334378,794625,336153,550128,30742,445218,558206,559888,555247,562111,557026,563670,100073335,564524,565643,794624,30442,566015,81886,798433,324481,403310,555635,436925,723994,407651,571143,492363,569502,798737,494054,560561,404209,550345,100002786,795408,557645,559447,571246,567289,735302,553210,794676,101885360,559270,559340,568269,565579,492818,563904,404622,573990,368421,393428,559728,10013…	kcnf1b,si:dkeyp-80c12.10,grm2a,rhbdl3,bmpr1ba,boka,cspg5a,plppr4a,gdpd5a,htr7a,adcy1a,si:dkey-21e5.1,rprml,chic1,kcng3,si:ch73-215d9.1,ednrba,shisa9b,vipr2,syt9a,clic1,cacna1da,fndc5b,cacnb1,crb2a,prlra,mmp24,slc7a3a,rtn2a,galr2b,tm7sf2,slc8a3,cnr1,syt13,si:dkey-27p18.2,tmem94,sstr1b,scn1lab,hs3st2,grpr,hrh1,st8sia1,si:dkey-221l4.11,gipr,slc1a6,clcn3,htr6,tspan3a,slc35g2a,cacna1g,camlg,pex16,gpr1…	0.0213947
msigdb	GO_G_PROTEIN_COUPLED_RECEPTOR_SIGNALING_PATHWAY	GO_G_PROTEIN_COUPLED_RECEPTOR_SIGNALING_PATHWAY	8.74062e-09	-18.5553	233	34	0.131783	258	5159	368421,568726,541315,100330681,404209,100333578,560140,336153,30442,100332913,100149100,564928,562111,569382,100149497,100334518,557026,735302,567289,30281,553266,559728,101883998,436769,793299,568269,100150704,266752,557645,550436,559201,100003539,403310,81886	gpr161,adcy7,adcyap1r1a,htr1e,cnr1,sstr2a,adipor2,grm2a,ednrba,grm5b,adra1ba,gpr26,htr7a,trhrb,rapgefl1,si:zfos-169g10.2,adcy1a,hrh1,grpr,npy,arrb1,kcnk2a,gpr153,homer1b,gpr85,htr6,si:dkey-52k1.6,adra2c,sstr1b,camk2a,tacr3l,tacr1a,cacna1da,vipr2	9.17176e-05
msigdb	GO_G_PROTEIN_COUPLED_RECEPTOR_ACTIVITY	GO_G_PROTEIN_COUPLED_RECEPTOR_ACTIVITY	1.02323e-08	-18.3977	137	25	0.0968992	258	5159	100330681,735302,404209,567289,368421,541315,560140,30281,336153,30442,100333578,568269,564928,100149100,562111,266752,101883998,100332913,793299,100003539,569382,81886,100334518,557645,559201	htr1e,hrh1,cnr1,grpr,gpr161,adcyap1r1a,adipor2,npy,grm2a,ednrba,sstr2a,htr6,gpr26,adra1ba,htr7a,adra2c,gpr153,grm5b,gpr85,tacr1a,trhrb,vipr2,si:zfos-169g10.2,sstr1b,tacr3l	9.17176e-05
msigdb	KEGG_NEUROACTIVE_LIGAND_RECEPTOR_INTERACTION	KEGG_NEUROACTIVE_LIGAND_RECEPTOR_INTERACTION	2.16858e-08	-17.6466	103	21	0.0813953	258	5159	100332913,407651,100149100,568269,100150704,562111,266752,557645,559201,100003539,569382,81886,100334518,541315,404209,100330681,735302,567289,100333578,336153,30442	grm5b,prlra,adra1ba,htr6,si:dkey-52k1.6,htr7a,adra2c,sstr1b,tacr3l,tacr1a,trhrb,vipr2,si:zfos-169g10.2,adcyap1r1a,cnr1,htr1e,hrh1,grpr,sstr2a,grm2a,ednrba	0.000129587
msigdb	GO_CEREBRAL_CORTEX_NEURON_DIFFERENTIATION	GO_CEREBRAL_CORTEX_NEURON_DIFFERENTIATION	2.0063e-07	-15.4218	11	7	0.0271318	258	5159	30221,64603,30568,378964,445565,81883,60634	psen1,eomesa,dlx1a,emx1,lhx6,nkx2.1,fezf2	0.000899172
msigdb	KEGG_CALCIUM_SIGNALING_PATHWAY	KEGG_CALCIUM_SIGNALING_PATHWAY	3.24161e-07	-14.942	81	17	0.0658915	258	5159	100332913,562111,100149100,568269,550436,559201,563904,557026,569382,100003539,403310,568726,567289,560561,735302,60658,30442	grm5b,htr7a,adra1ba,htr6,camk2a,tacr3l,cacna1g,adcy1a,trhrb,tacr1a,cacna1da,adcy7,grpr,slc8a3,hrh1,nos1,ednrba	0.00116225
msigdb	GO_NEURON_PART	GO_NEURON_PART	5.14278e-07	-14.4805	492	50	0.193798	258	5159	559728,394067,393416,553266,100136870,791448,30221,550345,100003539,100000374,550436,559201,557645,559447,336099,799942,100150704,266752,541397,30742,436597,436769,799410,402938,393796,336153,566015,100007749,324416,100333578,60658,569585,570138,368266,325033,568933,569090,404209,560561,541315,798433,336082,100334518,566809,100000711,327301,794623,559340,100332913,567500	kcnk2a,ykt6,arhgap4a,arrb1,cln8,qdprb1,psen1,syt13,tacr1a,syt17,camk2a,tacr3l,sstr1b,scn1lab,trim9,pde9a,si:dkey-52k1.6,adra2c,cnih2,bmpr1ba,rdh12,homer1b,kcnc4,txn2,kif4,grm2a,shisa9b,gphnb,dpysl5a,sstr2a,nos1,sptbn5,kcnn3,arhgef1a,ptprn2,kctd8,ngef,cnr1,slc8a3,adcyap1r1a,syt9a,nell2b,si:zfos-169g10.2,prss12,ngb,ppp1cab,cplx3b,clcn3,grm5b,ctnna2	0.00153658
msigdb	GO_CELL_CELL_SIGNALING	GO_CELL_CELL_SIGNALING	1.3798e-06	-13.4936	260	32	0.124031	258	5159	100332111,81886,403310,100003539,100000374,557645,559270,336099,266752,100150704,568269,541397,436769,799410,30281,30221,550345,497642,100334518,393890,563904,562111,794623,100149100,100332913,555184,336153,100333578,325033,562409,100330681,798433	shc3,vipr2,cacna1da,tacr1a,syt17,sstr1b,slc1a6,trim9,adra2c,si:dkey-52k1.6,htr6,cnih2,homer1b,kcnc4,npy,psen1,syt13,fgf14,si:zfos-169g10.2,panx1a,cacna1g,htr7a,cplx3b,adra1ba,grm5b,grapb,grm2a,sstr2a,ptprn2,si:ch211-198g19.1,htr1e,syt9a	0.00353368
msigdb	GO_SYNAPTIC_SIGNALING	GO_SYNAPTIC_SIGNALING	2.89869e-06	-12.7513	170	24	0.0930233	258	5159	563904,100000374,557645,559270,336099,100332111,100334518,100003539,100332913,436769,799410,562111,100150704,794623,568269,541397,100333578,30221,336153,30281,550345,798433,325033,100330681	cacna1g,syt17,sstr1b,slc1a6,trim9,shc3,si:zfos-169g10.2,tacr1a,grm5b,homer1b,kcnc4,htr7a,si:dkey-52k1.6,cplx3b,htr6,cnih2,sstr2a,psen1,grm2a,npy,syt13,syt9a,ptprn2,htr1e	0.00649561
msigdb	BENPORATH_ES_WITH_H3K27ME3	BENPORATH_ES_WITH_H3K27ME3	4.36897e-06	-12.341	397	41	0.158915	258	5159	562111,436823,81883,60634,445565,564928,378959,791563,100073335,566809,563904,559796,325033,58042,557278,324416,100334378,447808,100333578,64603,100150704,568269,30161,30568,799410,555635,30569,449663,403310,100003539,100536963,30274,406561,336099,550420,58027,393930,557123,559728,30635,571246	htr7a,pir,nkx2.1,fezf2,lhx6,gpr26,lhx8a,wnt16,rprml,prss12,cacna1g,bhlhe23,ptprn2,tbr1b,ppp1r13bb,dpysl5a,kcnf1b,fam43b,sstr2a,eomesa,si:dkey-52k1.6,htr6,chd,dlx1a,kcnc4,fndc5b,dlx5a,gpd1l,cacna1da,tacr1a,kcnip4,foxg1a,ddah1,trim9,gucy1a3,spon1a,bhlhe22,prkd1,kcnk2a,six3a,hs3st2	0.00814854
msigdb	REACTOME_CLASS_A1_RHODOPSIN_LIKE_RECEPTORS	REACTOME_CLASS_A1_RHODOPSIN_LIKE_RECEPTORS	5.20327e-06	-12.1662	78	15	0.0581395	258	5159	568269,404209,100149100,735302,100330681,567289,562111,569382,30281,100003539,30442,100334518,100333578,559201,557645	htr6,cnr1,adra1ba,hrh1,htr1e,grpr,htr7a,trhrb,npy,tacr1a,ednrba,si:zfos-169g10.2,sstr2a,tacr3l,sstr1b	0.00814854
msigdb	REACTOME_SIGNALING_BY_GPCR	REACTOME_SIGNALING_BY_GPCR	5.30358e-06	-12.1471	200	26	0.100775	258	5159	559201,557645,327301,791563,557026,100334518,406728,569382,81886,100003539,562111,100149100,568269,100333578,368266,30442,393416,336153,30281,541315,568726,567289,735302,100330681,569090,404209	tacr3l,sstr1b,ppp1cab,wnt16,adcy1a,si:zfos-169g10.2,map2k1,trhrb,vipr2,tacr1a,htr7a,adra1ba,htr6,sstr2a,arhgef1a,ednrba,arhgap4a,grm2a,npy,adcyap1r1a,adcy7,grpr,hrh1,htr1e,ngef,cnr1	0.00814854
msigdb	MODULE_146	MODULE_146	5.45448e-06	-12.1191	43	11	0.0426357	258	5159	100333578,559201,30281,30442,541315,404209,735302,100149100,568269,562111,567289	sstr2a,tacr3l,npy,ednrba,adcyap1r1a,cnr1,hrh1,adra1ba,htr6,htr7a,grpr	0.00814854
msigdb	GO_G_PROTEIN_COUPLED_RECEPTOR_SIGNALING_PATHWAY_COUPLED_TO_CYCLIC_NUCLEOTIDE_SECOND_MESSENGER	GO_G_PROTEIN_COUPLED_RECEPTOR_SIGNALING_PATHWAY_COUPLED_TO_CYCLIC_NUCLEOTIDE_SECOND_MESSENGER	6.13897e-06	-12.0009	79	15	0.0581395	258	5159	30281,403310,557026,100334518,336153,100333578,557645,564928,568269,404209,100149100,100330681,562111,266752,568726	npy,cacna1da,adcy1a,si:zfos-169g10.2,grm2a,sstr2a,sstr1b,gpr26,htr6,cnr1,adra1ba,htr1e,htr7a,adra2c,adcy7	0.00846564
msigdb	REACTOME_GPCR_LIGAND_BINDING	REACTOME_GPCR_LIGAND_BINDING	8.75585e-06	-11.6458	123	19	0.0736434	258	5159	562111,100149100,568269,791563,100334518,81886,569382,100003539,559201,557645,567289,404209,735302,100330681,541315,30442,336153,30281,100333578	htr7a,adra1ba,htr6,wnt16,si:zfos-169g10.2,vipr2,trhrb,tacr1a,tacr3l,sstr1b,grpr,cnr1,hrh1,htr1e,adcyap1r1a,ednrba,grm2a,npy,sstr2a	0.0111037
msigdb	BENPORATH_SUZ12_TARGETS	BENPORATH_SUZ12_TARGETS	9.44192e-06	-11.5704	395	40	0.155039	258	5159	100150704,100001484,568269,30161,30568,799410,403310,100003539,81886,100536963,30274,406561,336099,550420,58027,393930,559728,378964,30635,571246,562111,436823,81883,445565,60634,378959,791563,100000711,100073335,563904,559796,562409,58042,560561,557278,324416,100333578,447808,64603,60658	si:dkey-52k1.6,olig1,htr6,chd,dlx1a,kcnc4,cacna1da,tacr1a,vipr2,kcnip4,foxg1a,ddah1,trim9,gucy1a3,spon1a,bhlhe22,kcnk2a,emx1,six3a,hs3st2,htr7a,pir,nkx2.1,lhx6,fezf2,lhx8a,wnt16,ngb,rprml,cacna1g,bhlhe23,si:ch211-198g19.1,tbr1b,slc8a3,ppp1r13bb,dpysl5a,sstr2a,fam43b,eomesa,nos1	0.0111037
msigdb	ATGTTAA,MIR-302C	ATGTTAA,MIR-302C	9.91013e-06	-11.522	82	15	0.0581395	258	5159	792029,30568,378872,334483,321556,405902,568933,100150704,58042,30274,393796,30442,557026,767732,100007749	asf1bb,dlx1a,znf395,ptp4a2b,hnrnph1l,nrp2b,kctd8,si:dkey-52k1.6,tbr1b,foxg1a,kif4,ednrba,adcy1a,fam84b,gphnb	0.0111037
msigdb	MIKKELSEN_MCV6_HCP_WITH_H3K27ME3	MIKKELSEN_MCV6_HCP_WITH_H3K27ME3	1.06741e-05	-11.4477	159	22	0.0852713	258	5159	60634,568269,266752,562111,799410,327396,555635,403310,402968,100073335,336082,559796,563904,562409,405763,568726,100005257,58027,378964,100003595,571246,447808	fezf2,htr6,adra2c,htr7a,kcnc4,rrad,fndc5b,cacna1da,nhlh2,rprml,nell2b,bhlhe23,cacna1g,si:ch211-198g19.1,kcnh6a,adcy7,nptxrb,spon1a,emx1,ak5,hs3st2,fam43b	0.0112562
msigdb	BENPORATH_EED_TARGETS	BENPORATH_EED_TARGETS	1.33084e-05	-11.2271	372	38	0.147287	258	5159	563904,559796,791563,100000711,100073335,378959,562111,492339,436823,445565,60634,81883,447808,100333578,64603,560561,58042,562409,100330681,30274,406561,336099,403310,81886,30161,30568,799410,30569,100150704,100001484,30742,337350,559728,30635,58027,393930,30065,550420	cacna1g,bhlhe23,wnt16,ngb,rprml,lhx8a,htr7a,creg2,pir,lhx6,fezf2,nkx2.1,fam43b,sstr2a,eomesa,slc8a3,tbr1b,si:ch211-198g19.1,htr1e,foxg1a,ddah1,trim9,cacna1da,vipr2,chd,dlx1a,kcnc4,dlx5a,si:dkey-52k1.6,olig1,bmpr1ba,tbcb,kcnk2a,six3a,spon1a,bhlhe22,hug,gucy1a3	0.0132544
msigdb	REACTOME_GPCR_DOWNSTREAM_SIGNALING	REACTOME_GPCR_DOWNSTREAM_SIGNALING	1.76513e-05	-10.9447	164	22	0.0852713	258	5159	541315,568726,567289,735302,100330681,569090,404209,100333578,368266,393416,30442,30281,562111,568269,100149100,557645,559201,557026,100334518,100003539,569382,81886	adcyap1r1a,adcy7,grpr,hrh1,htr1e,ngef,cnr1,sstr2a,arhgef1a,arhgap4a,ednrba,npy,htr7a,htr6,adra1ba,sstr1b,tacr3l,adcy1a,si:zfos-169g10.2,tacr1a,trhrb,vipr2	0.0166544
msigdb	GO_CYCLIC_NUCLEOTIDE_MEDIATED_SIGNALING	GO_CYCLIC_NUCLEOTIDE_MEDIATED_SIGNALING	2.16519e-05	-10.7404	19	7	0.0271318	258	5159	568726,100150304,100150814,541315,799942,30442,557026	adcy7,gucy1b3,ksr1a,adcyap1r1a,pde9a,ednrba,adcy1a	0.0194077
msigdb	GO_TRANSPORTER_COMPLEX	GO_TRANSPORTER_COMPLEX	2.58003e-05	-10.5651	121	18	0.0697674	258	5159	403310,100536963,84040,563904,559447,100150704,541397,561434,799410,436951,559728,566015,100334378,565643,324481,100006090,60658,336770	cacna1da,kcnip4,clic3,cacna1g,scn1lab,si:dkey-52k1.6,cnih2,cacna2d1a,kcnc4,timm10,kcnk2a,shisa9b,kcnf1b,kcng3,clic1,abca2,nos1,abcf2a	0.0210478
msigdb	GO_SECOND_MESSENGER_MEDIATED_SIGNALING	GO_SECOND_MESSENGER_MEDIATED_SIGNALING	2.58299e-05	-10.564	59	12	0.0465116	258	5159	556178,100150304,60658,406561,557026,30442,568726,100150814,541315,735302,550420,799942	ncalda,gucy1b3,nos1,ddah1,adcy1a,ednrba,adcy7,ksr1a,adcyap1r1a,hrh1,gucy1a3,pde9a	0.0210478
msigdb	GO_NEURON_PROJECTION	GO_NEURON_PROJECTION	3.19044e-05	-10.3528	372	37	0.143411	258	5159	100332913,567500,327301,336082,100334518,566809,541315,325033,404209,569090,560561,100333578,60658,368266,393796,336153,566015,324416,100007749,436769,402938,799410,266752,100150704,30742,541397,559201,557645,559447,336099,100003539,791448,30221,559728,393416,394067,553266	grm5b,ctnna2,ppp1cab,nell2b,si:zfos-169g10.2,prss12,adcyap1r1a,ptprn2,cnr1,ngef,slc8a3,sstr2a,nos1,arhgef1a,kif4,grm2a,shisa9b,dpysl5a,gphnb,homer1b,txn2,kcnc4,adra2c,si:dkey-52k1.6,bmpr1ba,cnih2,tacr3l,sstr1b,scn1lab,trim9,tacr1a,qdprb1,psen1,kcnk2a,arhgap4a,ykt6,arrb1	0.024126
msigdb	GO_INTRINSIC_COMPONENT_OF_PLASMA_MEMBRANE	GO_INTRINSIC_COMPONENT_OF_PLASMA_MEMBRANE	3.22989e-05	-10.3405	521	47	0.182171	258	5159	557026,100334518,569382,571143,562111,100149100,492363,100332913,565579,30442,336153,100334378,566015,560140,100333578,325033,404209,100330681,562409,560561,541315,567234,100536963,81886,100003539,559201,557645,563441,559270,559447,368323,266752,541397,568269,30742,799410,559728,394067,565643,494054,30221,567289,678623,735302,557123,550345,405763	adcy1a,si:zfos-169g10.2,trhrb,mmp24,htr7a,adra1ba,slc7a3a,grm5b,tspan3a,ednrba,grm2a,kcnf1b,shisa9b,adipor2,sstr2a,ptprn2,cnr1,htr1e,si:ch211-198g19.1,slc8a3,adcyap1r1a,lrmp,kcnip4,vipr2,tacr1a,tacr3l,sstr1b,rasgrp3,slc1a6,scn1lab,si:ch211-204c21.1,adra2c,cnih2,htr6,bmpr1ba,kcnc4,kcnk2a,ykt6,kcng3,tm7sf2,psen1,grpr,slc11a2,hrh1,prkd1,syt13,kcnh6a	0.024126
msigdb	GO_VOLTAGE_GATED_ION_CHANNEL_ACTIVITY	GO_VOLTAGE_GATED_ION_CHANNEL_ACTIVITY	4.52795e-05	-10.0027	72	13	0.0503876	258	5159	559340,561434,405763,799410,559728,403310,100334378,565643,100536963,84040,563904,324481,559447	clcn3,cacna2d1a,kcnh6a,kcnc4,kcnk2a,cacna1da,kcnf1b,kcng3,kcnip4,clic3,cacna1g,clic1,scn1lab	0.032469
msigdb	GO_CIRCULATORY_SYSTEM_PROCESS	GO_CIRCULATORY_SYSTEM_PROCESS	5.16623e-05	-9.87078	139	19	0.0736434	258	5159	550420,735302,404209,562409,327320,30442,30281,556178,60658,562111,266752,81883,100149100,561434,449663,100003539,406561,559201,100150304	gucy1a3,hrh1,cnr1,si:ch211-198g19.1,f5,ednrba,npy,ncalda,nos1,htr7a,adra2c,nkx2.1,adra1ba,cacna2d1a,gpd1l,tacr1a,ddah1,tacr3l,gucy1b3	0.0356212
msigdb	BENPORATH_PRC2_TARGETS	BENPORATH_PRC2_TARGETS	6.78839e-05	-9.59771	244	27	0.104651	258	5159	100073335,403310,791563,336099,559796,563904,406561,30274,60634,445565,81883,436823,562111,100150704,799410,378959,30568,30161,30635,559728,64603,100333578,447808,58042,550420,393930,58027	rprml,cacna1da,wnt16,trim9,bhlhe23,cacna1g,ddah1,foxg1a,fezf2,lhx6,nkx2.1,pir,htr7a,si:dkey-52k1.6,kcnc4,lhx8a,dlx1a,chd,six3a,kcnk2a,eomesa,sstr2a,fam43b,tbr1b,gucy1a3,bhlhe22,spon1a	0.0450724
reactome	R-DRE-372790	Signaling by GPCR	8.03157e-10	-20.9425	288	38	0.277372	137	2926	553266,569382,101882850,568726,368266,567289,100003539,406728,436862,735302,336153,335625,557026,327301,569585,559888,406627,563732,101885360,550436,100150814,568269,103910215,100334518,100002786,562111,30442,404209,100333578,569090,266752,100332111,81886,30281,563441,559201,100330681,100149100	arrb1,trhrb,htr4,adcy7,arhgef1a,grpr,tacr1a,map2k1,psma6b,hrh1,grm2a,adcyap1b,adcy1a,ppp1cab,sptbn5,plppr4a,pebp1,uts1,gipr,camk2a,ksr1a,htr6,LOC103910215,si:zfos-169g10.2,si:dkey-27p18.2,htr7a,ednrba,cnr1,sstr2a,ngef,adra2c,shc3,vipr2,npy,rasgrp3,tacr3l,htr1e,adra1ba	1.10354e-06
reactome	R-DRE-388396	GPCR downstream signaling	3.97201e-07	-14.7388	192	26	0.189781	137	2926	81886,30281,100330681,336153,559201,100149100,569090,266752,735302,562111,100002786,30442,100333578,404209,568269,100003539,100334518,101885360,567289,368266,101882850,568726,335625,553266,569382,557026	vipr2,npy,htr1e,grm2a,tacr3l,adra1ba,ngef,adra2c,hrh1,htr7a,si:dkey-27p18.2,ednrba,sstr2a,cnr1,htr6,tacr1a,si:zfos-169g10.2,gipr,grpr,arhgef1a,htr4,adcy7,adcyap1b,arrb1,trhrb,adcy1a	0.000250803
reactome	R-DRE-500792	GPCR ligand binding	5.47605e-07	-14.4177	112	19	0.138686	137	2926	569382,335625,559888,101882850,563732,567289,100003539,100334518,568269,30442,404209,100333578,562111,735302,266752,100149100,30281,336153,100330681	trhrb,adcyap1b,plppr4a,htr4,uts1,grpr,tacr1a,si:zfos-169g10.2,htr6,ednrba,cnr1,sstr2a,htr7a,hrh1,adra2c,adra1ba,npy,grm2a,htr1e	0.000250803
reactome	R-DRE-373076	Class A/1 (Rhodopsin-like receptors)	3.86005e-06	-12.4648	93	16	0.116788	137	2926	568269,100003539,100334518,562111,30442,100333578,404209,266752,735302,30281,100330681,100149100,569382,559888,101882850,567289	htr6,tacr1a,si:zfos-169g10.2,htr7a,ednrba,sstr2a,cnr1,adra2c,hrh1,npy,htr1e,adra1ba,trhrb,plppr4a,htr4,grpr	0.00132593
reactome	R-DRE-375280	Amine ligand-binding receptors	4.00098e-05	-10.1264	22	7	0.0510949	137	2926	568269,266752,735302,562111,100330681,100149100,101882850	htr6,adra2c,hrh1,htr7a,htr1e,adra1ba,htr4	0.0109947
reactome	R-DRE-418555	G alpha (s) signalling events	7.51331e-05	-9.49625	50	10	0.0729927	137	2926	562111,100002786,568726,101882850,568269,553266,335625,557026,101885360,81886	htr7a,si:dkey-27p18.2,adcy7,htr4,htr6,arrb1,adcyap1b,adcy1a,gipr,vipr2	0.0172055
reactome	R-DRE-162582	Signal Transduction	0.000142799	-8.85408	760	55	0.40146	137	2926	553266,569382,101882850,568726,406269,368266,405902,567289,403012,402862,100003539,321556,406728,436862,735302,336153,793290,436597,335625,557026,393532,368421,327301,569585,559888,406627,100006857,563732,393416,101885360,550436,100150814,103910215,568269,492802,100334518,562111,100002786,30442,30742,404209,100333578,569090,393280,100332111,100002318,266752,791563,81886,563441,192325,30281,559201…	arrb1,trhrb,htr4,adcy7,h3f3a,arhgef1a,nrp2b,grpr,bub3,cdkn1ba,tacr1a,hnrnph1l,map2k1,psma6b,hrh1,grm2a,spred2b,rdh12,adcyap1b,adcy1a,pdhx,gpr161,ppp1cab,sptbn5,plppr4a,pebp1,elmo2,uts1,arhgap4a,gipr,camk2a,ksr1a,LOC103910215,htr6,rhoua,si:zfos-169g10.2,htr7a,si:dkey-27p18.2,ednrba,bmpr1ba,cnr1,sstr2a,ngef,nuf2,shc3,mapk13,adra2c,wnt16,vipr2,rasgrp3,ncbp2,npy,tacr3l,htr1e,adra1ba	0.0280293
interpro	IPR000276	GPCR_Rhodpsn	2.05097e-08	-17.7024	98	20	0.0692042	289	6095	735302,30442,100003539,567289,100333578,557645,266752,404209,793299,100330681,798737,564928,562111,569382,559201,101883998,368421,100334518,100149100,100002786	hrh1,ednrba,tacr1a,grpr,sstr2a,sstr1b,adra2c,cnr1,gpr85,htr1e,galr2b,gpr26,htr7a,trhrb,tacr3l,gpr153,gpr161,si:zfos-169g10.2,adra1ba,si:dkey-27p18.2	6.57029e-05
interpro	IPR017452	GPCR_Rhodpsn_7TM	2.05097e-08	-17.7024	98	20	0.0692042	289	6095	735302,30442,100003539,567289,100333578,266752,557645,793299,404209,798737,100330681,564928,562111,559201,569382,101883998,100334518,368421,100002786,100149100	hrh1,ednrba,tacr1a,grpr,sstr2a,adra2c,sstr1b,gpr85,cnr1,galr2b,htr1e,gpr26,htr7a,tacr3l,trhrb,gpr153,si:zfos-169g10.2,gpr161,si:dkey-27p18.2,adra1ba	6.57029e-05
kegg	ko04080	Neuroactive ligand-receptor interaction	1.46836e-11	-24.9443	115	25	0.252525	99	2101	541315,100149100,562111,101885360,567289,100333578,170451,81886,30442,735302,336153,798737,404209,100334518,100332913,568269,569382,559201,101882850,100003539,407651,266752,100002786,100150704,100330681	adcyap1r1a,adra1ba,htr7a,gipr,grpr,sstr2a,gria2b,vipr2,ednrba,hrh1,grm2a,galr2b,cnr1,si:zfos-169g10.2,grm5b,htr6,trhrb,tacr3l,htr4,tacr1a,prlra,adra2c,si:dkey-27p18.2,si:dkey-52k1.6,htr1e	4.73546e-09
kegg	dre04080	Neuroactive ligand-receptor interaction	1.46836e-11	-24.9443	115	25	0.252525	99	2101	100332913,100334518,81886,30442,735302,336153,798737,404209,100333578,170451,541315,100149100,101885360,562111,567289,100330681,100150704,100003539,407651,266752,100002786,568269,569382,559201,101882850	grm5b,si:zfos-169g10.2,vipr2,ednrba,hrh1,grm2a,galr2b,cnr1,sstr2a,gria2b,adcyap1r1a,adra1ba,gipr,htr7a,grpr,htr1e,si:dkey-52k1.6,tacr1a,prlra,adra2c,si:dkey-27p18.2,htr6,trhrb,tacr3l,htr4	4.73546e-09
kegg	dre04020	Calcium signaling pathway	3.13712e-07	-14.9748	99	18	0.181818	99	2101	100003539,101882850,563904,559201,569382,568269,568726,403310,560561,557026,550436,60658,567289,562111,100149100,100332913,735302,30442	tacr1a,htr4,cacna1g,tacr3l,trhrb,htr6,adcy7,cacna1da,slc8a3,adcy1a,camk2a,nos1,grpr,htr7a,adra1ba,grm5b,hrh1,ednrba	5.0586e-05
kegg	ko04020	Calcium signaling pathway	3.13712e-07	-14.9748	99	18	0.181818	99	2101	550436,560561,403310,557026,568726,563904,559201,569382,568269,101882850,100003539,30442,735302,100332913,562111,100149100,567289,60658	camk2a,slc8a3,cacna1da,adcy1a,adcy7,cacna1g,tacr3l,trhrb,htr6,htr4,tacr1a,ednrba,hrh1,grm5b,htr7a,adra1ba,grpr,nos1	5.0586e-05
prosite	PS50262	G_PROTEIN_RECEP_F1_2	3.84304e-08	-17.0744	98	20	0.104712	191	3826	793299,100149100,100333578,100002786,567289,569382,100334518,100330681,557645,100003539,798737,101883998,562111,30442,559201,368421,404209,564928,735302,266752	gpr85,adra1ba,sstr2a,si:dkey-27p18.2,grpr,trhrb,si:zfos-169g10.2,htr1e,sstr1b,tacr1a,galr2b,gpr153,htr7a,ednrba,tacr3l,gpr161,cnr1,gpr26,hrh1,adra2c	4.68082e-05
prosite	PS00237	G_PROTEIN_RECEP_F1_1	1.27656e-07	-15.8739	77	17	0.0890052	191	3826	562111,30442,404209,368421,559201,266752,735302,100003539,798737,569382,100330681,100334518,557645,100333578,100002786,100149100,567289	htr7a,ednrba,cnr1,gpr161,tacr3l,adra2c,hrh1,tacr1a,galr2b,trhrb,htr1e,si:zfos-169g10.2,sstr1b,sstr2a,si:dkey-27p18.2,adra1ba,grpr	7.77426e-05

## Sheet: T_Greenyellow
Source	TermID	Term	Enrichment	logP	Genes in Term	Target Genes in Term	Fraction of Targets in Term	Total Target Genes	Total Genes	Entrez Gene IDs	Gene Symbols	AdjustedP
biological_process	GO:0061061	muscle structure development	1.48469e-15	-34.1436	106	25	0.151515	165	5061	567771,405801,30441,566928,100149766,572412,100884147,565849,100149390,393828,404627,286832,573301,565429,337767,560297,407989,566851,100001241,492356,100003572,30148,572733,641575,556258	col6a2,rbm24a,tmod4,neb,tmod1,obscnb,myh7ba,ppp2r3a,lmod3,myoz2b,six1b,lamc1,nexn,hspg2,lamb2,pgm5,adssl1,tmem2,synpo2lb,mybpc1,tnnt3b,desma,pgam2,actn2b,tcap	9.17837e-12
biological_process	GO:0055001	muscle cell development	1.97703e-12	-26.9494	59	17	0.10303	165	5061	573301,404627,393828,100149390,100884147,100149766,572412,566928,30441,567771,556258,641575,30148,100003572,492356,407989,560297	nexn,six1b,myoz2b,lmod3,myh7ba,tmod1,obscnb,neb,tmod4,col6a2,tcap,actn2b,desma,tnnt3b,mybpc1,adssl1,pgm5	6.11099e-09
biological_process	GO:0042692	muscle cell differentiation	3.67389e-12	-26.3298	70	18	0.109091	165	5061	30441,572412,100149766,566928,567771,404627,393828,573301,100884147,100149390,100003572,560297,492356,407989,556258,572733,30148,641575	tmod4,obscnb,tmod1,neb,col6a2,six1b,myoz2b,nexn,myh7ba,lmod3,tnnt3b,pgm5,mybpc1,adssl1,tcap,pgam2,desma,actn2b	7.57067e-09
biological_process	GO:0051146	striated muscle cell differentiation	3.39881e-11	-24.105	60	16	0.0969697	165	5061	30148,572733,641575,100003572,560297,407989,492356,393828,404627,573301,100149390,30441,100149766,572412,566928,567771	desma,pgam2,actn2b,tnnt3b,pgm5,adssl1,mybpc1,myoz2b,six1b,nexn,lmod3,tmod4,tmod1,obscnb,neb,col6a2	5.25286e-08
biological_process	GO:0055002	striated muscle cell development	7.59916e-11	-23.3004	54	15	0.0909091	165	5061	573301,404627,393828,100149390,641575,30148,100149766,572412,566928,30441,100003572,492356,407989,567771,560297	nexn,six1b,myoz2b,lmod3,actn2b,desma,tmod1,obscnb,neb,tmod4,tnnt3b,mybpc1,adssl1,col6a2,pgm5	9.3956e-08
biological_process	GO:0006936	muscle contraction	2.3395e-09	-19.8733	19	9	0.0545455	165	5061	431732,30441,100149766,415209,798565,373076,30148,100149390,58082	smpx,tmod4,tmod1,tpm2,ryr1a,tpm3,desma,lmod3,tnnc2	2.41046e-06
biological_process	GO:0003012	muscle system process	4.13555e-09	-19.3036	20	9	0.0545455	165	5061	373076,798565,100149390,58082,30148,100149766,431732,30441,415209	tpm3,ryr1a,lmod3,tnnc2,desma,tmod1,smpx,tmod4,tpm2	3.65229e-06
biological_process	GO:0031032	actomyosin structure organization	1.30148e-08	-18.1572	37	11	0.0666667	165	5061	641575,100149390,30148,568593,393828,406658,560297,572412,100149766,30441,100003572	actn2b,lmod3,desma,sdc4,myoz2b,cnn2,pgm5,obscnb,tmod1,tmod4,tnnt3b	1.00572e-05
biological_process	GO:0007517	muscle organ development	5.09221e-08	-16.793	51	12	0.0727273	165	5061	567771,337767,405801,407989,100001241,566851,492356,30148,641575,404627,286832,565429	col6a2,lamb2,rbm24a,adssl1,synpo2lb,tmem2,mybpc1,desma,actn2b,six1b,lamc1,hspg2	2.87159e-05
biological_process	GO:0060538	skeletal muscle organ development	5.65543e-08	-16.6881	42	11	0.0666667	165	5061	407989,405801,566851,492356,100001241,337767,565429,404627,286832,641575,30148	adssl1,rbm24a,tmem2,mybpc1,synpo2lb,lamb2,hspg2,six1b,lamc1,actn2b,desma	2.87159e-05
biological_process	GO:0016052	carbohydrate catabolic process	6.00193e-08	-16.6286	19	8	0.0484848	165	5061	321664,246095,572733,317743,553352,560297,447836,336425	aldob,gpib,pgam2,gapdh,aglb,pgm5,pfkma,aldoaa	2.87159e-05
biological_process	GO:0044724	single-organism carbohydrate catabolic process	6.00193e-08	-16.6286	19	8	0.0484848	165	5061	317743,553352,447836,336425,560297,246095,321664,572733	gapdh,aglb,pfkma,aldoaa,pgm5,gpib,aldob,pgam2	2.87159e-05
biological_process	GO:0030239	myofibril assembly	6.49819e-08	-16.5492	26	9	0.0545455	165	5061	393828,30148,100149390,641575,30441,100003572,100149766,572412,560297	myoz2b,desma,lmod3,actn2b,tmod4,tnnt3b,tmod1,obscnb,pgm5	2.87159e-05
biological_process	GO:0030036	actin cytoskeleton organization	6.50312e-08	-16.5484	110	17	0.10303	165	5061	568593,373076,641575,30148,100003572,337401,403001,415209,393367,560297,406658,393828,393809,100149390,100149766,572412,30441	sdc4,tpm3,actn2b,desma,tnnt3b,ehd2b,cfl2,tpm2,coro6,pgm5,cnn2,myoz2b,cap2,lmod3,tmod1,obscnb,tmod4	2.87159e-05
biological_process	GO:0030029	actin filament-based process	7.46472e-08	-16.4105	111	17	0.10303	165	5061	415209,393367,560297,406658,337401,403001,100003572,30148,641575,568593,373076,30441,100149766,572412,393809,100149390,393828	tpm2,coro6,pgm5,cnn2,ehd2b,cfl2,tnnt3b,desma,actn2b,sdc4,tpm3,tmod4,tmod1,obscnb,cap2,lmod3,myoz2b	3.07646e-05
biological_process	GO:0010927	cellular component assembly involved in morphogenesis	9.47696e-08	-16.1718	27	9	0.0545455	165	5061	393828,30148,100149390,641575,30441,100003572,100149766,572412,560297	myoz2b,desma,lmod3,actn2b,tmod4,tnnt3b,tmod1,obscnb,pgm5	3.66166e-05
biological_process	GO:0009132	nucleoside diphosphate metabolic process	1.52807e-07	-15.6941	21	8	0.0484848	165	5061	30084,572733,246095,445486,321664,336425,447836,317743	nme2b.2,pgam2,gpib,ak1,aldob,aldoaa,pfkma,gapdh	5.55677e-05
biological_process	GO:0060537	muscle tissue development	1.91364e-07	-15.4691	57	12	0.0727273	165	5061	560297,407989,405801,492356,100001241,566851,404627,286832,573301,565429,30148,641575	pgm5,adssl1,rbm24a,mybpc1,synpo2lb,tmem2,six1b,lamc1,nexn,hspg2,desma,actn2b	6.22639e-05
biological_process	GO:0014706	striated muscle tissue development	1.91364e-07	-15.4691	57	12	0.0727273	165	5061	30148,641575,286832,404627,573301,565429,560297,492356,566851,100001241,405801,407989	desma,actn2b,lamc1,six1b,nexn,hspg2,pgm5,mybpc1,tmem2,synpo2lb,rbm24a,adssl1	6.22639e-05
biological_process	GO:0046939	nucleotide phosphorylation	3.08078e-07	-14.9929	16	7	0.0424242	165	5061	246095,317743,321664,447836,30084,336425,572733	gpib,gapdh,aldob,pfkma,nme2b.2,aldoaa,pgam2	8.65699e-05
biological_process	GO:0006165	nucleoside diphosphate phosphorylation	3.08078e-07	-14.9929	16	7	0.0424242	165	5061	321664,246095,317743,572733,336425,30084,447836	aldob,gpib,gapdh,pgam2,aldoaa,nme2b.2,pfkma	8.65699e-05
biological_process	GO:0046031	ADP metabolic process	3.08078e-07	-14.9929	16	7	0.0424242	165	5061	336425,447836,572733,317743,445486,246095,321664	aldoaa,pfkma,pgam2,gapdh,ak1,gpib,aldob	8.65699e-05
biological_process	GO:0009135	purine nucleoside diphosphate metabolic process	5.09442e-07	-14.4899	17	7	0.0424242	165	5061	321664,246095,317743,445486,572733,336425,447836	aldob,gpib,gapdh,ak1,pgam2,aldoaa,pfkma	0.000125975
biological_process	GO:0009185	ribonucleoside diphosphate metabolic process	5.09442e-07	-14.4899	17	7	0.0424242	165	5061	317743,246095,445486,321664,336425,447836,572733	gapdh,gpib,ak1,aldob,aldoaa,pfkma,pgam2	0.000125975
biological_process	GO:0009179	purine ribonucleoside diphosphate metabolic process	5.09442e-07	-14.4899	17	7	0.0424242	165	5061	317743,246095,445486,321664,447836,336425,572733	gapdh,gpib,ak1,aldob,pfkma,aldoaa,pgam2	0.000125975
biological_process	GO:0006091	generation of precursor metabolites and energy	9.00366e-07	-13.9205	54	11	0.0666667	165	5061	321664,550442,246095,572733,555748,494035,317743,553352,560297,336425,447836	aldob,coq10b,gpib,pgam2,ugp2a,mtfr1,gapdh,aglb,pgm5,aldoaa,pfkma	0.000214079
biological_process	GO:0009167	purine ribonucleoside monophosphate metabolic process	9.83864e-07	-13.8318	44	10	0.0606061	165	5061	321664,246095,445486,393867,572733,317743,556578,407989,336425,447836	aldob,gpib,ak1,ampd1,pgam2,gapdh,ampd3a,adssl1,aldoaa,pfkma	0.000217223
biological_process	GO:0009126	purine nucleoside monophosphate metabolic process	9.83864e-07	-13.8318	44	10	0.0606061	165	5061	393867,246095,445486,321664,572733,317743,447836,336425,407989,556578	ampd1,gpib,ak1,aldob,pgam2,gapdh,pfkma,aldoaa,adssl1,ampd3a	0.000217223
biological_process	GO:0007519	skeletal muscle tissue development	1.14021e-06	-13.6843	35	9	0.0545455	165	5061	100001241,492356,405801,407989,641575,30148,565429,286832,404627	synpo2lb,mybpc1,rbm24a,adssl1,actn2b,desma,hspg2,lamc1,six1b	0.000243061
biological_process	GO:0072521	purine-containing compound metabolic process	1.19186e-06	-13.64	79	13	0.0787879	165	5061	445486,246095,393867,796865,321664,30084,572733,317743,260441,407989,336425,447836,556578	ak1,gpib,ampd1,gamt,aldob,nme2b.2,pgam2,gapdh,mthfd1b,adssl1,aldoaa,pfkma,ampd3a	0.000245602
biological_process	GO:0006096	glycolytic process	1.55733e-06	-13.3725	13	6	0.0363636	165	5061	321664,246095,317743,572733,447836,336425	aldob,gpib,gapdh,pgam2,pfkma,aldoaa	0.000298605
biological_process	GO:0006757	ATP generation from ADP	1.55733e-06	-13.3725	13	6	0.0363636	165	5061	246095,317743,321664,447836,336425,572733	gpib,gapdh,aldob,pfkma,aldoaa,pgam2	0.000298605
biological_process	GO:0097435	supramolecular fiber organization	1.59398e-06	-13.3493	94	14	0.0848485	165	5061	100003572,30441,100149766,572412,560297,415209,403001,393828,568593,373076,30148,393809,641575,100149390	tnnt3b,tmod4,tmod1,obscnb,pgm5,tpm2,cfl2,myoz2b,sdc4,tpm3,desma,cap2,actn2b,lmod3	0.000298605
biological_process	GO:0009161	ribonucleoside monophosphate metabolic process	2.31674e-06	-12.9754	48	10	0.0606061	165	5061	572733,321664,393867,246095,445486,556578,336425,447836,407989,317743	pgam2,aldob,ampd1,gpib,ak1,ampd3a,aldoaa,pfkma,adssl1,gapdh	0.000421237
biological_process	GO:0009123	nucleoside monophosphate metabolic process	2.82982e-06	-12.7753	49	10	0.0606061	165	5061	317743,556578,407989,447836,336425,321664,246095,445486,393867,572733	gapdh,ampd3a,adssl1,pfkma,aldoaa,aldob,gpib,ak1,ampd1,pgam2	0.000499827
biological_process	GO:0009888	tissue development	3.93652e-06	-12.4452	443	33	0.2	165	5061	641575,100332594,553407,407639,560297,407989,492356,286832,565429,450019,334724,405759,565849,393940,337298,568593,567674,30148,321449,368419,323696,337767,100001241,566851,404627,405860,114424,573301,406454,337158,393347,405801,336425	actn2b,tgfbr3,sec24d,gh1,pgm5,adssl1,mybpc1,lamc1,hspg2,hspb7,anxa1a,nr5a1b,ppp2r3a,atp2a2a,sulf1,sdc4,lats2,desma,ctgfa,ccdc80,f11r.1,lamb2,synpo2lb,tmem2,six1b,igfbp7,cdh1,nexn,epcam,col1a1a,fgfrl1a,rbm24a,aldoaa	0.000675988
biological_process	GO:0046128	purine ribonucleoside metabolic process	5.99834e-06	-12.024	53	10	0.0606061	165	5061	572733,30084,321664,796865,246095,445486,447836,336425,407989,317743	pgam2,nme2b.2,aldob,gamt,gpib,ak1,pfkma,aldoaa,adssl1,gapdh	0.000975835
biological_process	GO:0042278	purine nucleoside metabolic process	5.99834e-06	-12.024	53	10	0.0606061	165	5061	317743,336425,447836,407989,246095,445486,321664,796865,30084,572733	gapdh,aldoaa,pfkma,adssl1,gpib,ak1,aldob,gamt,nme2b.2,pgam2	0.000975835
biological_process	GO:0048646	anatomical structure formation involved in morphogenesis	9.14675e-06	-11.6021	260	23	0.139394	165	5061	100332594,641575,368419,572733,30148,394012,100003572,566851,560297,565429,114424,405860,393828,100149390,503514,450019,100149766,556641,572412,30441,337298,336425,405801	tgfbr3,actn2b,ccdc80,pgam2,desma,itga9,tnnt3b,tmem2,pgm5,hspg2,cdh1,igfbp7,myoz2b,lmod3,angptl2b,hspb7,tmod1,pld1a,obscnb,tmod4,sulf1,aldoaa,rbm24a	0.00144988
biological_process	GO:0009150	purine ribonucleotide metabolic process	9.70393e-06	-11.543	68	11	0.0666667	165	5061	317743,336425,447836,407989,556578,393867,246095,445486,321664,30084,572733	gapdh,aldoaa,pfkma,adssl1,ampd3a,ampd1,gpib,ak1,aldob,nme2b.2,pgam2	0.0014859
biological_process	GO:0006090	pyruvate metabolic process	1.00725e-05	-11.5057	17	6	0.0363636	165	5061	572733,336425,447836,321664,317743,246095	pgam2,aldoaa,pfkma,aldob,gapdh,gpib	0.0014859
biological_process	GO:0048747	muscle fiber development	1.00951e-05	-11.5035	25	7	0.0424242	165	5061	566928,573301,404627,641575,492356,407989,567771	neb,nexn,six1b,actn2b,mybpc1,adssl1,col6a2	0.0014859
biological_process	GO:0007010	cytoskeleton organization	1.08002e-05	-11.4359	208	20	0.121212	165	5061	572412,100149766,30441,393809,100149390,393828,100321011,337401,403001,560297,393367,415209,406658,317743,100003572,641575,30148,568593,100533983,373076	obscnb,tmod1,tmod4,cap2,lmod3,myoz2b,si:ch211-165e15.1,ehd2b,cfl2,pgm5,coro6,tpm2,cnn2,gapdh,tnnt3b,actn2b,desma,sdc4,eml3,tpm3	0.00155272
biological_process	GO:0006163	purine nucleotide metabolic process	1.48897e-05	-11.1148	71	11	0.0666667	165	5061	30084,572733,393867,246095,445486,321664,447836,336425,407989,556578,317743	nme2b.2,pgam2,ampd1,gpib,ak1,aldob,pfkma,aldoaa,adssl1,ampd3a,gapdh	0.00205433
biological_process	GO:0009205	purine ribonucleoside triphosphate metabolic process	1.49539e-05	-11.1105	36	8	0.0484848	165	5061	336425,447836,317743,572733,30084,321664,246095,445486	aldoaa,pfkma,gapdh,pgam2,nme2b.2,aldob,gpib,ak1	0.00205433
biological_process	GO:0009259	ribonucleotide metabolic process	1.70848e-05	-10.9773	72	11	0.0666667	165	5061	317743,407989,336425,447836,556578,246095,445486,393867,321664,30084,572733	gapdh,adssl1,aldoaa,pfkma,ampd3a,gpib,ak1,ampd1,aldob,nme2b.2,pgam2	0.00229605
biological_process	GO:0006733	oxidoreduction coenzyme metabolic process	1.76484e-05	-10.9449	27	7	0.0424242	165	5061	336425,447836,572733,246095,317743,321664,550442	aldoaa,pfkma,pgam2,gpib,gapdh,aldob,coq10b	0.00232133
biological_process	GO:0009144	purine nucleoside triphosphate metabolic process	1.85551e-05	-10.8948	37	8	0.0484848	165	5061	321664,246095,445486,572733,30084,317743,336425,447836	aldob,gpib,ak1,pgam2,nme2b.2,gapdh,aldoaa,pfkma	0.00238975
biological_process	GO:0019362	pyridine nucleotide metabolic process	2.0913e-05	-10.7751	19	6	0.0363636	165	5061	317743,246095,321664,336425,447836,572733	gapdh,gpib,aldob,aldoaa,pfkma,pgam2	0.00258568
biological_process	GO:0046496	nicotinamide nucleotide metabolic process	2.0913e-05	-10.7751	19	6	0.0363636	165	5061	447836,336425,572733,246095,317743,321664	pfkma,aldoaa,pgam2,gpib,gapdh,aldob	0.00258568
biological_process	GO:0009199	ribonucleoside triphosphate metabolic process	2.28579e-05	-10.6862	38	8	0.0484848	165	5061	572733,30084,321664,246095,445486,336425,447836,317743	pgam2,nme2b.2,aldob,gpib,ak1,aldoaa,pfkma,gapdh	0.00277074
biological_process	GO:0019693	ribose phosphate metabolic process	2.54384e-05	-10.5793	75	11	0.0666667	165	5061	556578,336425,447836,407989,317743,572733,30084,321664,393867,445486,246095	ampd3a,aldoaa,pfkma,adssl1,gapdh,pgam2,nme2b.2,aldob,ampd1,ak1,gpib	0.00299378
biological_process	GO:0009119	ribonucleoside metabolic process	2.56665e-05	-10.5703	62	10	0.0606061	165	5061	317743,407989,447836,336425,796865,321664,445486,246095,572733,30084	gapdh,adssl1,pfkma,aldoaa,gamt,aldob,ak1,gpib,pgam2,nme2b.2	0.00299378
biological_process	GO:0055086	nucleobase-containing small molecule metabolic process	2.71713e-05	-10.5133	104	13	0.0787879	165	5061	260441,317743,556578,407989,336425,447836,796865,321664,246095,445486,393867,572733,30084	mthfd1b,gapdh,ampd3a,adssl1,aldoaa,pfkma,gamt,aldob,gpib,ak1,ampd1,pgam2,nme2b.2	0.00311061
biological_process	GO:0072524	pyridine-containing compound metabolic process	2.90746e-05	-10.4456	20	6	0.0363636	165	5061	572733,447836,336425,321664,246095,317743	pgam2,pfkma,aldoaa,aldob,gpib,gapdh	0.00326799
biological_process	GO:0006732	coenzyme metabolic process	3.41791e-05	-10.2839	64	10	0.0606061	165	5061	572733,100037369,321664,550442,796865,246095,447836,336425,260441,317743	pgam2,atpif1a,aldob,coq10b,gamt,gpib,pfkma,aldoaa,mthfd1b,gapdh	0.00377313
biological_process	GO:0009653	anatomical structure morphogenesis	3.54419e-05	-10.2476	604	38	0.230303	165	5061	393558,100149390,393809,405860,393828,114424,393347,336425,405801,406454,572412,337158,572733,30148,368419,114426,567674,568593,566851,100003572,394012,450019,503514,565849,286832,565429,393940,567771,337298,30441,100149766,556641,100332594,641575,399646,336266,560297,553407	mb,lmod3,cap2,igfbp7,myoz2b,cdh1,fgfrl1a,aldoaa,rbm24a,epcam,obscnb,col1a1a,pgam2,desma,ccdc80,odc1,lats2,sdc4,tmem2,tnnt3b,itga9,hspb7,angptl2b,ppp2r3a,lamc1,hspg2,atp2a2a,col6a2,sulf1,tmod4,tmod1,pld1a,tgfbr3,actn2b,fhl1a,loxl3b,pgm5,sec24d	0.0038439
biological_process	GO:0046034	ATP metabolic process	3.72482e-05	-10.1979	30	7	0.0424242	165	5061	246095,317743,445486,321664,336425,447836,572733	gpib,gapdh,ak1,aldob,aldoaa,pfkma,pgam2	0.00397015
biological_process	GO:0009116	nucleoside metabolic process	3.92721e-05	-10.145	65	10	0.0606061	165	5061	317743,407989,336425,447836,246095,445486,796865,321664,30084,572733	gapdh,adssl1,aldoaa,pfkma,gpib,ak1,gamt,aldob,nme2b.2,pgam2	0.00411492
biological_process	GO:0009141	nucleoside triphosphate metabolic process	4.93583e-05	-9.9164	42	8	0.0484848	165	5061	30084,572733,445486,246095,321664,336425,447836,317743	nme2b.2,pgam2,ak1,gpib,aldob,aldoaa,pfkma,gapdh	0.00508555
biological_process	GO:1901657	glycosyl compound metabolic process	5.14271e-05	-9.87534	67	10	0.0606061	165	5061	246095,445486,321664,796865,30084,572733,317743,336425,447836,407989	gpib,ak1,aldob,gamt,nme2b.2,pgam2,gapdh,aldoaa,pfkma,adssl1	0.00521184
biological_process	GO:0009117	nucleotide metabolic process	0.000127721	-8.96566	89	11	0.0666667	165	5061	317743,407989,447836,336425,556578,246095,445486,393867,321664,30084,572733	gapdh,adssl1,pfkma,aldoaa,ampd3a,gpib,ak1,ampd1,aldob,nme2b.2,pgam2	0.012735
biological_process	GO:0051694	pointed-end actin filament capping	0.000132912	-8.92582	4	3	0.0181818	165	5061	100149390,30441,100149766	lmod3,tmod4,tmod1	0.0130423
biological_process	GO:0006753	nucleoside phosphate metabolic process	0.000141456	-8.86352	90	11	0.0666667	165	5061	556578,407989,447836,336425,317743,572733,30084,321664,246095,445486,393867	ampd3a,adssl1,pfkma,aldoaa,gapdh,pgam2,nme2b.2,aldob,gpib,ak1,ampd1	0.0136638
biological_process	GO:0007015	actin filament organization	0.000179776	-8.6238	50	8	0.0484848	165	5061	100149390,393809,373076,568593,415209,403001,30441,100149766	lmod3,cap2,tpm3,sdc4,tpm2,cfl2,tmod4,tmod1	0.0170981
biological_process	GO:0014902	myotube differentiation	0.000210425	-8.46638	18	5	0.030303	165	5061	492356,641575,407989,572733,404627	mybpc1,actn2b,adssl1,pgam2,six1b	0.0197098
biological_process	GO:0044723	single-organism carbohydrate metabolic process	0.000222721	-8.40959	65	9	0.0545455	165	5061	572733,246095,321664,447836,336425,560297,553352,317743,555748	pgam2,gpib,aldob,pfkma,aldoaa,pgm5,aglb,gapdh,ugp2a	0.0205501
biological_process	GO:0003008	system process	0.000238331	-8.34185	163	15	0.0909091	165	5061	368419,58082,100149390,30148,445506,373076,556258,286832,798565,337298,415209,100004946,100149766,431732,30441	ccdc80,tnnc2,lmod3,desma,emp2,tpm3,tcap,lamc1,ryr1a,sulf1,tpm2,trpm4a,tmod1,smpx,tmod4	0.0216671
biological_process	GO:0061053	somite development	0.00031182	-8.07308	54	8	0.0484848	165	5061	286832,100332594,565849,368419,337298,336425,405801,337767	lamc1,tgfbr3,ppp2r3a,ccdc80,sulf1,aldoaa,rbm24a,lamb2	0.0279373
biological_process	GO:0051186	cofactor metabolic process	0.000430484	-7.7506	86	10	0.0606061	165	5061	246095,321664,550442,796865,572733,100037369,317743,260441,336425,447836	gpib,aldob,coq10b,gamt,pgam2,atpif1a,gapdh,mthfd1b,aldoaa,pfkma	0.0380179
biological_process	GO:0044763	single-organism cellular process	0.000495425	-7.61009	1933	84	0.509091	165	5061	556578,560297,492356,553356,796753,30723,407989,260441,406325,436585,568032,321664,798565,30363,393940,567771,790934,556641,494035,100037369,450019,101883603,286832,415209,566851,369195,337401,566675,100003572,317743,572733,393874,553665,556258,567674,373076,568593,246095,353221,494489,393558,100149390,393828,114424,393367,553407,562996,561350,641575,564500,447836,337298,30441,100149766,566928,55…	ampd3a,pgm5,mybpc1,sec16b,si:ch211-247n2.1,tpt1,adssl1,mthfd1b,acaa2,hic1,rbp2a,aldob,ryr1a,fzd4,atp2a2a,col6a2,mapkapk3,pld1a,mtfr1,atpif1a,hspb7,cdc42ep1a,lamc1,tpm2,tmem2,tgfb3,ehd2b,suox,tnnt3b,gapdh,pgam2,tmem38a,cnot6l,tcap,lats2,tpm3,sdc4,gpib,pomca,atp2a1l,mb,lmod3,myoz2b,cdh1,coro6,sec24d,dnase2b,ryr3,actn2b,scara5,pfkma,sulf1,tmod4,tmod1,neb,aglb,sgk2a,exoc3l2b,mtus1a,ppp2r3a,gamt,hspg2…	0.0431369
molecular_function	GO:0003779	actin binding	5.89443e-10	-21.2518	115	20	0.120482	166	5028	58082,403009,641575,323320,566928,573301,100149390,373076,100001241,30441,100884147,406658,415209,100149766,393809,100002040,100321011,393828,403001,393367	tnnc2,ezra,actn2b,actn3b,neb,nexn,lmod3,tpm3,synpo2lb,tmod4,myh7ba,cnn2,tpm2,tmod1,cap2,myhb,si:ch211-165e15.1,myoz2b,cfl2,coro6	1.27791e-06
molecular_function	GO:0008092	cytoskeletal protein binding	4.14756e-08	-16.9982	190	23	0.138554	166	5028	393367,100533983,393828,403001,30723,100321011,100002040,100149766,393809,100884147,415209,406658,30441,373076,100001241,100149390,573301,566928,403009,323320,641575,58082,317743	coro6,eml3,myoz2b,cfl2,tpt1,si:ch211-165e15.1,myhb,tmod1,cap2,myh7ba,tpm2,cnn2,tmod4,tpm3,synpo2lb,lmod3,nexn,neb,ezra,actn3b,actn2b,tnnc2,gapdh	4.49595e-05
molecular_function	GO:0005509	calcium ion binding	2.9865e-05	-10.4188	220	20	0.120482	166	5028	252849,100535241,445153,58143,553503,565849,30723,323320,641575,562072,337401,58082,114424,336655,561350,334724,402807,337298,565429,798565	thbs3a,thbs2a,itsn2b,mylz3,fbln2,ppp2r3a,tpt1,actn3b,actn2b,ltbp1,ehd2b,tnnc2,cdh1,icn,ryr3,anxa1a,pvalb7,sulf1,hspg2,ryr1a	0.0215824
cellular_component	GO:0030017	sarcomere	7.66954e-21	-46.317	25	17	0.112583	151	4882	415209,58082,100149390,100149766,393828,561350,431732,30148,560297,573301,100003572,373076,100001241,30441,798565,556258,572412	tpm2,tnnc2,lmod3,tmod1,myoz2b,ryr3,smpx,desma,pgm5,nexn,tnnt3b,tpm3,synpo2lb,tmod4,ryr1a,tcap,obscnb	5.25463e-18
cellular_component	GO:0030016	myofibril	2.15796e-20	-45.2825	26	17	0.112583	151	4882	572412,30441,798565,100001241,373076,556258,100003572,560297,30148,431732,573301,561350,393828,100149766,100149390,415209,58082	obscnb,tmod4,ryr1a,synpo2lb,tpm3,tcap,tnnt3b,pgm5,desma,smpx,nexn,ryr3,myoz2b,tmod1,lmod3,tpm2,tnnc2	5.25463e-18
cellular_component	GO:0044449	contractile fiber part	2.15796e-20	-45.2825	26	17	0.112583	151	4882	572412,373076,100001241,30441,798565,556258,100003572,431732,30148,560297,573301,393828,100149766,561350,58082,415209,100149390	obscnb,tpm3,synpo2lb,tmod4,ryr1a,tcap,tnnt3b,smpx,desma,pgm5,nexn,myoz2b,tmod1,ryr3,tnnc2,tpm2,lmod3	5.25463e-18
cellular_component	GO:0043292	contractile fiber	2.15796e-20	-45.2825	26	17	0.112583	151	4882	100003572,556258,798565,30441,373076,100001241,572412,100149390,415209,58082,561350,393828,100149766,573301,560297,431732,30148	tnnt3b,tcap,ryr1a,tmod4,tpm3,synpo2lb,obscnb,lmod3,tpm2,tnnc2,ryr3,myoz2b,tmod1,nexn,pgm5,smpx,desma	5.25463e-18
cellular_component	GO:0030018	Z disc	1.06338e-10	-22.9644	11	8	0.0529801	151	4882	556258,561350,393828,798565,100001241,573301,560297,30148	tcap,ryr3,myoz2b,ryr1a,synpo2lb,nexn,pgm5,desma	1.51968e-08
cellular_component	GO:0099081	supramolecular polymer	1.24819e-10	-22.8042	101	19	0.125828	151	4882	100536858,100003572,572412,556258,373076,100001241,30441,798565,415209,58082,100149390,573301,431732,30148,560297,100149766,393828,561350,406844	mfap5,tnnt3b,obscnb,tcap,tpm3,synpo2lb,tmod4,ryr1a,tpm2,tnnc2,lmod3,nexn,smpx,desma,pgm5,tmod1,myoz2b,ryr3,krt15	1.51968e-08
cellular_component	GO:0099080	supramolecular complex	1.24819e-10	-22.8042	101	19	0.125828	151	4882	561350,406844,393828,100149766,573301,560297,30148,431732,100149390,415209,58082,556258,30441,798565,100001241,373076,572412,100003572,100536858	ryr3,krt15,myoz2b,tmod1,nexn,pgm5,desma,smpx,lmod3,tpm2,tnnc2,tcap,tmod4,ryr1a,synpo2lb,tpm3,obscnb,tnnt3b,mfap5	1.51968e-08
cellular_component	GO:0099512	supramolecular fiber	1.24819e-10	-22.8042	101	19	0.125828	151	4882	373076,100001241,30441,798565,556258,572412,100003572,100536858,100149766,393828,406844,561350,431732,30148,560297,573301,58082,415209,100149390	tpm3,synpo2lb,tmod4,ryr1a,tcap,obscnb,tnnt3b,mfap5,tmod1,myoz2b,krt15,ryr3,smpx,desma,pgm5,nexn,tnnc2,tpm2,lmod3	1.51968e-08
cellular_component	GO:0031674	I band	3.10697e-10	-21.8922	12	8	0.0529801	151	4882	560297,30148,573301,798565,100001241,561350,556258,393828	pgm5,desma,nexn,ryr1a,synpo2lb,ryr3,tcap,myoz2b	3.36243e-08
cellular_component	GO:0036379	myofilament	7.01907e-09	-18.7746	11	7	0.0463576	151	4882	100149390,30441,100003572,373076,58082,415209,100149766	lmod3,tmod4,tnnt3b,tpm3,tnnc2,tpm2,tmod1	6.21507e-07
cellular_component	GO:0005865	striated muscle thin filament	7.01907e-09	-18.7746	11	7	0.0463576	151	4882	100003572,373076,415209,58082,100149390,30441,100149766	tnnt3b,tpm3,tpm2,tnnc2,lmod3,tmod4,tmod1	6.21507e-07
cellular_component	GO:0015629	actin cytoskeleton	1.10886e-08	-18.3173	79	15	0.0993377	151	4882	58082,415209,100003572,100149390,393809,100149766,393828,403001,100001241,373076,100884147,393367,30441,560297,100002040	tnnc2,tpm2,tnnt3b,lmod3,cap2,tmod1,myoz2b,cfl2,synpo2lb,tpm3,myh7ba,coro6,tmod4,pgm5,myhb	9.00027e-07
cellular_component	GO:0033017	sarcoplasmic reticulum membrane	2.65298e-08	-17.445	5	5	0.0331126	151	4882	393874,798565,561350,494489,393940	tmem38a,ryr1a,ryr3,atp2a1l,atp2a2a	1.9877e-06
cellular_component	GO:0016528	sarcoplasm	1.50427e-07	-15.7098	10	6	0.0397351	151	4882	494489,393940,553333,393874,798565,561350	atp2a1l,atp2a2a,jph2,tmem38a,ryr1a,ryr3	1.04654e-05
cellular_component	GO:0016529	sarcoplasmic reticulum	5.29683e-07	-14.451	7	5	0.0331126	151	4882	798565,393874,561350,393940,494489	ryr1a,tmem38a,ryr3,atp2a2a,atp2a1l	3.43941e-05
cellular_component	GO:0005856	cytoskeleton	1.74212e-06	-13.2604	307	26	0.172185	151	4882	560297,30148,406658,393367,317743,403001,406844,100149766,393828,449936,567674,321664,100321011,100149390,415209,58082,100002040,30441,373076,100884147,550568,100001241,403009,393809,100003572,100533983	pgm5,desma,cnn2,coro6,gapdh,cfl2,krt15,tmod1,myoz2b,ppl,lats2,aldob,si:ch211-165e15.1,lmod3,tpm2,tnnc2,myhb,tmod4,tpm3,myh7ba,pdlim1,synpo2lb,ezra,cap2,tnnt3b,eml3	0.000106052
cellular_component	GO:0005576	extracellular region	3.94713e-05	-10.1399	280	22	0.145695	151	4882	407639,286832,252849,796299,337158,336471,30255,100334431,100535241,369195,570643,553503,368419,405860,393730,100001725,100536858,353221,100150119,321449,321046,100332594	gh1,lamc1,thbs3a,ntn5,col1a1a,col1a2,tfa,col5a1,thbs2a,tgfb3,vwf,fbln2,ccdc80,igfbp7,scg3,emilin2a,mfap5,pomca,si:cabz01007802.1,ctgfa,c3a.1,tgfbr3	0.00226147
cellular_component	GO:0043232	intracellular non-membrane-bounded organelle	0.000205275	-8.49116	593	34	0.225166	151	4882	100149390,415209,100321011,449936,403001,406844,393828,100149766,393367,573301,406658,100533983,337010,100001241,373076,100002040,321769,58082,321664,567674,561350,317743,560297,30148,431732,100003572,393809,556258,403009,798565,30441,100884147,550568,572412	lmod3,tpm2,si:ch211-165e15.1,ppl,cfl2,krt15,myoz2b,tmod1,coro6,nexn,cnn2,eml3,rpl7a,synpo2lb,tpm3,myhb,nsa2,tnnc2,aldob,lats2,ryr3,gapdh,pgm5,desma,smpx,tnnt3b,cap2,tcap,ezra,ryr1a,tmod4,myh7ba,pdlim1,obscnb	0.010523
cellular_component	GO:0043228	non-membrane-bounded organelle	0.000205275	-8.49116	593	34	0.225166	151	4882	393809,100003572,572412,550568,100884147,798565,30441,403009,556258,567674,321664,58082,321769,30148,431732,560297,317743,561350,100533983,100002040,100001241,373076,337010,449936,100321011,415209,100149390,406658,573301,393367,393828,100149766,406844,403001	cap2,tnnt3b,obscnb,pdlim1,myh7ba,ryr1a,tmod4,ezra,tcap,lats2,aldob,tnnc2,nsa2,desma,smpx,pgm5,gapdh,ryr3,eml3,myhb,synpo2lb,tpm3,rpl7a,ppl,si:ch211-165e15.1,tpm2,lmod3,cnn2,nexn,coro6,myoz2b,tmod1,krt15,cfl2	0.010523
cellular_component	GO:0031012	extracellular matrix	0.000307863	-8.08586	87	10	0.0662252	151	4882	570643,100535241,100536858,100334431,321449,100001725,337158,336471,286832,368419	vwf,thbs2a,mfap5,col5a1,ctgfa,emilin2a,col1a1a,col1a2,lamc1,ccdc80	0.0149929
cellular_component	GO:0031672	A band	0.000950521	-6.9585	2	2	0.013245	151	4882	572412,431732	obscnb,smpx	0.0402525
cellular_component	GO:0005790	smooth endoplasmic reticulum	0.000950521	-6.9585	2	2	0.013245	151	4882	561350,798565	ryr3,ryr1a	0.0402525
cellular_component	GO:0031430	M band	0.000950521	-6.9585	2	2	0.013245	151	4882	431732,572412	smpx,obscnb	0.0402525
cellular_component	GO:0044421	extracellular region part	0.00115391	-6.7646	179	14	0.0927152	151	4882	336471,30255,337158,368419,286832,100001725,321046,321449,100535241,100334431,353221,100536858,570643,369195	col1a2,tfa,col1a1a,ccdc80,lamc1,emilin2a,c3a.1,ctgfa,thbs2a,col5a1,pomca,mfap5,vwf,tgfb3	0.0468296
msigdb	GO_CONTRACTILE_FIBER	GO_CONTRACTILE_FIBER	4.18833e-21	-46.922	70	25	0.158228	158	5159	30441,559276,100149390,58082,393828,494489,572412,100003572,556258,403001,492356,568593,100149766,553333,560297,798565,431732,415209,100002040,58143,336425,405791,334269,373076,641575	tmod4,ahnak,lmod3,tnnc2,myoz2b,atp2a1l,obscnb,tnnt3b,tcap,cfl2,mybpc1,sdc4,tmod1,jph2,pgm5,ryr1a,smpx,tpm2,myhb,mylz3,aldoaa,cacna1sb,myom2a,tpm3,actn2b	7.50843e-17
msigdb	GO_MUSCLE_SYSTEM_PROCESS	GO_MUSCLE_SYSTEM_PROCESS	4.81536e-18	-39.8747	109	27	0.170886	158	5159	337298,100003572,556258,393940,492356,393558,100149766,572733,30441,58082,100149390,751793,494489,336425,405791,796865,559066,373076,641575,334269,548602,798565,431732,415209,393165,58143,100002040	sulf1,tnnt3b,tcap,atp2a2a,mybpc1,mb,tmod1,pgam2,tmod4,tnnc2,lmod3,mybpc2a,atp2a1l,aldoaa,cacna1sb,gamt,myofl,tpm3,actn2b,myom2a,myoc,ryr1a,smpx,tpm2,pdlim5b,mylz3,myhb	4.31624e-14
msigdb	GO_MUSCLE_CONTRACTION	GO_MUSCLE_CONTRACTION	3.68171e-16	-35.538	87	23	0.14557	158	5159	30441,58082,100149390,751793,337298,556258,100003572,492356,393558,100149766,572733,798565,431732,100002040,415209,58143,336425,405791,796865,559066,373076,641575,334269	tmod4,tnnc2,lmod3,mybpc2a,sulf1,tcap,tnnt3b,mybpc1,mb,tmod1,pgam2,ryr1a,smpx,myhb,tpm2,mylz3,aldoaa,cacna1sb,gamt,myofl,tpm3,actn2b,myom2a	2.20007e-12
msigdb	GO_ACTIN_MYOSIN_FILAMENT_SLIDING	GO_ACTIN_MYOSIN_FILAMENT_SLIDING	1.93221e-14	-31.5775	15	11	0.0696203	158	5159	58143,415209,100002040,751793,58082,100149766,373076,641575,492356,556258,100003572	mylz3,tpm2,myhb,mybpc2a,tnnc2,tmod1,tpm3,actn2b,mybpc1,tcap,tnnt3b	6.92774e-11
msigdb	GO_MUSCLE_FILAMENT_SLIDING	GO_MUSCLE_FILAMENT_SLIDING	1.93221e-14	-31.5775	15	11	0.0696203	158	5159	58082,751793,415209,58143,100002040,556258,100003572,492356,641575,373076,100149766	tnnc2,mybpc2a,tpm2,mylz3,myhb,tcap,tnnt3b,mybpc1,actn2b,tpm3,tmod1	6.92774e-11
msigdb	HALLMARK_MYOGENESIS	HALLMARK_MYOGENESIS	1.92946e-13	-29.2764	82	20	0.126582	158	5159	334269,641575,337158,373076,30095,405860,58143,100002040,447836,393558,445486,572733,399646,556258,100003572,791580,58082,494489,567771,553553	myom2a,actn2b,col1a1a,tpm3,ckma,igfbp7,mylz3,myhb,pfkma,mb,ak1,pgam2,fhl1a,tcap,tnnt3b,hspb8,tnnc2,atp2a1l,col6a2,cfd	5.73677e-10
msigdb	GSE32533_WT_VS_MIR17_OVEREXPRESS_ACT_CD4_TCELL_DN	GSE32533_WT_VS_MIR17_OVEREXPRESS_ACT_CD4_TCELL_DN	2.24005e-13	-29.1271	73	19	0.120253	158	5159	565849,548602,246095,449936,447836,798565,100334492,431732,393347,58143,405801,791580,403001,393809,393558,560297,100536479,327067,393828	ppp2r3a,myoc,gpib,ppl,pfkma,ryr1a,entpd5b,smpx,fgfrl1a,mylz3,rbm24a,hspb8,cfl2,cap2,mb,pgm5,podn,slc25a4,myoz2b	5.73677e-10
msigdb	RICKMAN_HEAD_AND_NECK_CANCER_F	RICKMAN_HEAD_AND_NECK_CANCER_F	9.62201e-13	-27.6696	19	11	0.0696203	158	5159	30095,492356,641575,373076,393558,399646,58082,751793,431732,58143,415209	ckma,mybpc1,actn2b,tpm3,mb,fhl1a,tnnc2,mybpc2a,smpx,mylz3,tpm2	2.15617e-09
msigdb	GO_ACTIN_MEDIATED_CELL_CONTRACTION	GO_ACTIN_MEDIATED_CELL_CONTRACTION	1.63134e-12	-27.1416	31	13	0.0822785	158	5159	798565,58082,751793,100002040,415209,58143,445506,556258,100003572,492356,641575,373076,100149766	ryr1a,tnnc2,mybpc2a,myhb,tpm2,mylz3,emp2,tcap,tnnt3b,mybpc1,actn2b,tpm3,tmod1	3.24944e-09
msigdb	GO_ACTIN_CYTOSKELETON	GO_ACTIN_CYTOSKELETON	3.5298e-12	-26.3698	155	25	0.158228	158	5159	58143,415209,393165,100002040,393367,641575,373076,334269,114424,336425,58082,100149390,393828,751793,30441,562279,559276,100149766,560297,450019,100003572,406658,403009,492356,403001	mylz3,tpm2,pdlim5b,myhb,coro6,actn2b,tpm3,myom2a,cdh1,aldoaa,tnnc2,lmod3,myoz2b,mybpc2a,tmod4,myo19,ahnak,tmod1,pgm5,hspb7,tnnt3b,cnn2,ezra,mybpc1,cfl2	6.26968e-09
msigdb	REACTOME_STRIATED_MUSCLE_CONTRACTION	REACTOME_STRIATED_MUSCLE_CONTRACTION	3.84707e-12	-26.2837	12	9	0.056962	158	5159	415209,58143,58082,751793,641575,373076,100149766,492356,556258	tpm2,mylz3,tnnc2,mybpc2a,actn2b,tpm3,tmod1,mybpc1,tcap	6.26968e-09
msigdb	KUNINGER_IGF1_VS_PDGFB_TARGETS_UP	KUNINGER_IGF1_VS_PDGFB_TARGETS_UP	5.24753e-12	-25.9733	27	12	0.0759494	158	5159	494489,58143,415209,431732,58082,393874,447845,100001241,572733,334269,100003572,30095	atp2a1l,mylz3,tpm2,smpx,tnnc2,tmem38a,sdprb,synpo2lb,pgam2,myom2a,tnnt3b,ckma	7.83937e-09
msigdb	GO_ACTIN_BINDING	GO_ACTIN_BINDING	8.74295e-12	-25.4628	135	23	0.14557	158	5159	406658,100003572,492356,403001,403009,100149766,393809,100001241,562279,30441,751793,393828,100149390,58082,336425,336655,373076,641575,407989,393367,415209,100002040,393165	cnn2,tnnt3b,mybpc1,cfl2,ezra,tmod1,cap2,synpo2lb,myo19,tmod4,mybpc2a,myoz2b,lmod3,tnnc2,aldoaa,icn,tpm3,actn2b,adssl1,coro6,tpm2,myhb,pdlim5b	1.20565e-08
msigdb	GNF2_TTN	GNF2_TTN	2.77533e-11	-24.3077	10	8	0.0506329	158	5159	494489,58143,751793,58082,492356,100003572,30095,373076	atp2a1l,mylz3,mybpc2a,tnnc2,mybpc1,tnnt3b,ckma,tpm3	3.55381e-08
msigdb	V$TATA_01	V$TATA_01	3.9524e-11	-23.9541	74	17	0.107595	158	5159	415209,393347,100002040,407639,337158,336655,30095,393828,58082,561450,321035,327067,568032,393867,403001,353221,794178	tpm2,fgfrl1a,myhb,gh1,col1a1a,icn,ckma,myoz2b,tnnc2,plag1,pabpc4,slc25a4,rbp2a,ampd1,cfl2,pomca,hdlbpa	4.57413e-08
msigdb	GO_CYTOSKELETAL_PROTEIN_BINDING	GO_CYTOSKELETAL_PROTEIN_BINDING	4.08245e-11	-23.9217	281	32	0.202532	158	5159	100003572,406658,403009,492356,393809,450019,407989,317743,393367,100002040,393165,336425,336655,114424,373076,548602,562279,30441,100536841,751793,393828,100149390,58082,572412,556258,403001,321664,100149766,393867,100001241,415209,641575	tnnt3b,cnn2,ezra,mybpc1,cap2,hspb7,adssl1,gapdh,coro6,myhb,pdlim5b,aldoaa,icn,cdh1,tpm3,myoc,myo19,tmod4,agbl1,mybpc2a,myoz2b,lmod3,tnnc2,obscnb,tcap,cfl2,aldob,tmod1,ampd1,synpo2lb,tpm2,actn2b	4.57413e-08
msigdb	GO_ACTIN_FILAMENT_BASED_PROCESS	GO_ACTIN_FILAMENT_BASED_PROCESS	5.66552e-11	-23.594	161	24	0.151899	158	5159	336425,323696,373076,337401,641575,393367,798565,100002040,58143,415209,445506,406658,100003572,556258,572412,403001,403009,492356,100149766,334724,30441,58082,100149390,751793	aldoaa,f11r.1,tpm3,ehd2b,actn2b,coro6,ryr1a,myhb,mylz3,tpm2,emp2,cnn2,tnnt3b,tcap,obscnb,cfl2,ezra,mybpc1,tmod1,anxa1a,tmod4,tnnc2,lmod3,mybpc2a	5.97446e-08
msigdb	GO_ACTIN_FILAMENT_BASED_MOVEMENT	GO_ACTIN_FILAMENT_BASED_MOVEMENT	7.49562e-11	-23.3141	40	13	0.0822785	158	5159	798565,58082,751793,58143,100002040,415209,445506,100003572,556258,492356,641575,373076,100149766	ryr1a,tnnc2,mybpc2a,mylz3,myhb,tpm2,emp2,tnnt3b,tcap,mybpc1,actn2b,tpm3,tmod1	7.46523e-08
msigdb	V$SRF_Q4	V$SRF_Q4	8.15742e-11	-23.2295	88	18	0.113924	158	5159	403001,553333,100149766,100536479,327067,100001725,30095,445051,565849,373076,447845,406844,321449,335370,415209,393347,58143,393165	cfl2,jph2,tmod1,podn,slc25a4,emilin2a,ckma,krt91,ppp2r3a,tpm3,sdprb,krt15,ctgfa,eef1b2,tpm2,fgfrl1a,mylz3,pdlim5b	7.69674e-08
msigdb	GNF2_MYL2	GNF2_MYL2	9.91288e-11	-23.0346	11	8	0.0506329	158	5159	641575,393558,450019,100001241,572733,556258,393828,327067	actn2b,mb,hspb7,synpo2lb,pgam2,tcap,myoz2b,slc25a4	8.88541e-08
msigdb	REACTOME_MUSCLE_CONTRACTION	REACTOME_MUSCLE_CONTRACTION	1.8002e-10	-22.438	16	9	0.056962	158	5159	100149766,373076,641575,492356,556258,58143,415209,751793,58082	tmod1,tpm3,actn2b,mybpc1,tcap,mylz3,tpm2,mybpc2a,tnnc2	1.53677e-07
msigdb	V$SRF_Q6	V$SRF_Q6	4.46895e-10	-21.5287	97	18	0.113924	158	5159	447845,406844,373076,337158,445051,565849,100001725,30095,58143,393165,393347,406325,100536479,553333,403001,406658,336471,327067	sdprb,krt15,tpm3,col1a1a,krt91,ppp2r3a,emilin2a,ckma,mylz3,pdlim5b,fgfrl1a,acaa2,podn,jph2,cfl2,cnn2,col1a2,slc25a4	3.64159e-07
msigdb	KEGG_ECM_RECEPTOR_INTERACTION	KEGG_ECM_RECEPTOR_INTERACTION	5.40592e-10	-21.3384	46	13	0.0822785	158	5159	567771,394012,570643,565429,286832,100535241,336471,100334431,564821,252849,337158,568593,337767	col6a2,itga9,vwf,hspg2,lamc1,thbs2a,col1a2,col5a1,col5a2a,thbs3a,col1a1a,sdc4,lamb2	4.21356e-07
msigdb	GO_SYSTEM_PROCESS	GO_SYSTEM_PROCESS	1.1837e-09	-20.5546	494	41	0.259494	158	5159	405791,796865,559066,336425,337767,548602,373076,798565,246095,393165,100002040,431732,30363,403009,492356,404627,337298,100003572,393940,572733,393558,336471,494489,323696,337158,641575,334269,796753,100004946,777750,415209,58143,353221,445506,556258,100149766,30441,751785,100149390,58082,751793	cacna1sb,gamt,myofl,aldoaa,lamb2,myoc,tpm3,ryr1a,gpib,pdlim5b,myhb,smpx,fzd4,ezra,mybpc1,six1b,sulf1,tnnt3b,atp2a2a,pgam2,mb,col1a2,atp2a1l,f11r.1,col1a1a,actn2b,myom2a,si:ch211-247n2.1,trpm4a,ece1,tpm2,mylz3,pomca,emp2,tcap,tmod1,tmod4,aldh1a3,lmod3,tnnc2,mybpc2a	8.84176e-07
msigdb	CTAWWWATA_V$RSRFC4_Q2	CTAWWWATA_V$RSRFC4_Q2	1.48054e-09	-20.3309	130	20	0.126582	158	5159	403001,393558,393867,100001241,327067,559276,751793,58082,393828,100535241,30095,336425,334269,336655,373076,100004946,393367,431732,58143,100002040	cfl2,mb,ampd1,synpo2lb,slc25a4,ahnak,mybpc2a,tnnc2,myoz2b,thbs2a,ckma,aldoaa,myom2a,icn,tpm3,trpm4a,coro6,smpx,mylz3,myhb	1.06166e-06
msigdb	GO_STRUCTURAL_CONSTITUENT_OF_MUSCLE	GO_STRUCTURAL_CONSTITUENT_OF_MUSCLE	1.66772e-09	-20.2118	14	8	0.0506329	158	5159	751793,415209,58143,572412,556258,492356,334269,641575	mybpc2a,tpm2,mylz3,obscnb,tcap,mybpc1,myom2a,actn2b	1.1499e-06
msigdb	GO_STRUCTURAL_MOLECULE_ACTIVITY	GO_STRUCTURAL_MOLECULE_ACTIVITY	1.95852e-09	-20.0511	222	26	0.164557	158	5159	327067,559276,334724,336471,553503,751793,337010,492356,572412,556258,100334431,560297,449936,60635,58143,415209,286832,445051,100001725,564821,406844,407730,337767,334269,641575,337158	slc25a4,ahnak,anxa1a,col1a2,fbln2,mybpc2a,rpl7a,mybpc1,obscnb,tcap,col5a1,pgm5,ppl,cldn7b,mylz3,tpm2,lamc1,krt91,emilin2a,col5a2a,krt15,chchd3a,lamb2,myom2a,actn2b,col1a1a	1.30038e-06
msigdb	LIU_PROSTATE_CANCER_DN	LIU_PROSTATE_CANCER_DN	3.8096e-09	-19.3857	181	23	0.14557	158	5159	445051,559066,561082,503514,337767,406844,337401,336655,550568,394012,100332594,415209,403001,791580,100334431,399646,560297,406325,100536479,553553,369195,565429,336471	krt91,myofl,ptrfb,angptl2b,lamb2,krt15,ehd2b,icn,pdlim1,itga9,tgfbr3,tpm2,cfl2,hspb8,col5a1,fhl1a,pgm5,acaa2,podn,cfd,tgfb3,hspg2,col1a2	2.4391e-06
msigdb	YAUCH_HEDGEHOG_SIGNALING_PARACRINE_DN	YAUCH_HEDGEHOG_SIGNALING_PARACRINE_DN	4.25472e-09	-19.2752	86	16	0.101266	158	5159	323696,30095,334269,641575,798565,393367,58143,100002040,492356,100003572,393558,562062,30441,494489,751793,58082	f11r.1,ckma,myom2a,actn2b,ryr1a,coro6,mylz3,myhb,mybpc1,tnnt3b,mb,socs2,tmod4,atp2a1l,mybpc2a,tnnc2	2.63015e-06
msigdb	ZHU_CMV_24_HR_DN	ZHU_CMV_24_HR_DN	5.3842e-09	-19.0398	45	12	0.0759494	158	5159	564821,406658,337158,337767,334724,100332594,553553,567771,286832,336471,415209,100535241	col5a2a,cnn2,col1a1a,lamb2,anxa1a,tgfbr3,cfd,col6a2,lamc1,col1a2,tpm2,thbs2a	3.21742e-06
msigdb	GO_MYOFILAMENT	GO_MYOFILAMENT	6.59596e-09	-18.8368	11	7	0.0443038	158	5159	415209,100149766,373076,100149390,58082,100003572,30441	tpm2,tmod1,tpm3,lmod3,tnnc2,tnnt3b,tmod4	3.66871e-06
msigdb	EBAUER_MYOGENIC_TARGETS_OF_PAX3_FOXO1_FUSION	EBAUER_MYOGENIC_TARGETS_OF_PAX3_FOXO1_FUSION	6.68241e-09	-18.8238	22	9	0.056962	158	5159	399646,492356,100003572,393165,58143,415209,751793,431732,58082	fhl1a,mybpc1,tnnt3b,pdlim5b,mylz3,tpm2,mybpc2a,smpx,tnnc2	3.66871e-06
msigdb	GO_I_BAND	GO_I_BAND	6.75336e-09	-18.8132	37	11	0.0696203	158	5159	798565,393828,494489,572412,336425,556258,403001,405791,553333,641575,560297	ryr1a,myoz2b,atp2a1l,obscnb,aldoaa,tcap,cfl2,cacna1sb,jph2,actn2b,pgm5	3.66871e-06
msigdb	EBAUER_TARGETS_OF_PAX3_FOXO1_FUSION_UP	EBAUER_TARGETS_OF_PAX3_FOXO1_FUSION_UP	8.28899e-09	-18.6083	78	15	0.0949367	158	5159	393165,58143,415209,431732,751793,58082,403009,492356,100003572,561082,406325,399646,393867,337158,445486	pdlim5b,mylz3,tpm2,smpx,mybpc2a,tnnc2,ezra,mybpc1,tnnt3b,ptrfb,acaa2,fhl1a,ampd1,col1a1a,ak1	4.37049e-06
msigdb	ZHONG_SECRETOME_OF_LUNG_CANCER_AND_ENDOTHELIUM	ZHONG_SECRETOME_OF_LUNG_CANCER_AND_ENDOTHELIUM	9.69086e-09	-18.4521	30	10	0.0632911	158	5159	317743,30723,403001,405860,336425,373076,337158,568593,30255,114424	gapdh,tpt1,cfl2,igfbp7,aldoaa,tpm3,col1a1a,sdc4,tfa,cdh1	4.82578e-06
msigdb	GO_ACTOMYOSIN_STRUCTURE_ORGANIZATION	GO_ACTOMYOSIN_STRUCTURE_ORGANIZATION	9.69086e-09	-18.4521	30	10	0.0632911	158	5159	415209,100149390,30441,641575,100149766,323696,403001,556258,406658,572412	tpm2,lmod3,tmod4,actn2b,tmod1,f11r.1,cfl2,tcap,cnn2,obscnb	4.82578e-06
msigdb	MODULE_6	MODULE_6	1.33383e-08	-18.1326	147	20	0.126582	158	5159	553553,334724,567771,570643,58082,369195,553503,565429,751785,406454,402957,336471,404627,393558,60635,449936,415209,336655,114424,337767	cfd,anxa1a,col6a2,vwf,tnnc2,tgfb3,fbln2,hspg2,aldh1a3,epcam,cnksr1,col1a2,six1b,mb,cldn7b,ppl,tpm2,icn,cdh1,lamb2	6.44863e-06
msigdb	CHICAS_RB1_TARGETS_CONFLUENT	CHICAS_RB1_TARGETS_CONFLUENT	1.36692e-08	-18.1081	226	25	0.158228	158	5159	503514,337158,337401,336655,559066,564821,561082,436585,415209,571812,550568,796753,445486,568593,404627,100334431,792002,337298,406658,751785,336471,559276,334724,567771,368419	angptl2b,col1a1a,ehd2b,icn,myofl,col5a2a,ptrfb,hic1,tpm2,pear1,pdlim1,si:ch211-247n2.1,ak1,sdc4,six1b,col5a1,rhbdl2,sulf1,cnn2,aldh1a3,col1a2,ahnak,anxa1a,col6a2,ccdc80	6.44863e-06
msigdb	NABA_CORE_MATRISOME	NABA_CORE_MATRISOME	1.67176e-08	-17.9068	107	17	0.107595	158	5159	337767,337158,252849,405860,100001725,564821,286832,101882427,321449,100536479,100334431,565429,553503,336471,100535241,570643,567771	lamb2,col1a1a,thbs3a,igfbp7,emilin2a,col5a2a,lamc1,vwa5b2,ctgfa,podn,col5a1,hspg2,fbln2,col1a2,thbs2a,vwf,col6a2	7.68453e-06
msigdb	DELYS_THYROID_CANCER_UP	DELYS_THYROID_CANCER_UP	2.9067e-08	-17.3537	169	21	0.132911	158	5159	337158,336655,406844,100001725,564821,445051,777750,114426,436617,60635,550568,449936,394012,790934,568593,321046,406325,561450,751785,100535241,334724	col1a1a,icn,krt15,emilin2a,col5a2a,krt91,ece1,odc1,rxrgb,cldn7b,pdlim1,ppl,itga9,mapkapk3,sdc4,c3a.1,acaa2,plag1,aldh1a3,thbs2a,anxa1a	1.30271e-05
msigdb	GO_MYOFIBRIL_ASSEMBLY	GO_MYOFIBRIL_ASSEMBLY	3.68226e-08	-17.1172	19	8	0.0506329	158	5159	100149766,641575,403001,572412,556258,415209,100149390,30441	tmod1,actn2b,cfl2,obscnb,tcap,tpm2,lmod3,tmod4	1.61005e-05
msigdb	HUMMERICH_SKIN_CANCER_PROGRESSION_DN	HUMMERICH_SKIN_CANCER_PROGRESSION_DN	5.03188e-08	-16.8049	44	11	0.0696203	158	5159	567771,58082,100002040,58143,556258,100003572,393558,399646,337767,321046,450019	col6a2,tnnc2,myhb,mylz3,tcap,tnnt3b,mb,fhl1a,lamb2,c3a.1,hspb7	2.14777e-05
msigdb	HUMMERICH_BENIGN_SKIN_TUMOR_DN	HUMMERICH_BENIGN_SKIN_TUMOR_DN	5.8482e-08	-16.6545	9	6	0.0379747	158	5159	100003572,30095,553553,100002040,494489,58082	tnnt3b,ckma,cfd,myhb,atp2a1l,tnnc2	2.43815e-05
msigdb	MARTINEZ_RB1_TARGETS_UP	MARTINEZ_RB1_TARGETS_UP	7.29021e-08	-16.4341	228	24	0.151899	158	5159	445506,794178,569308,556258,403001,30255,406325,450019,553553,567771,553503,494489,30095,445051,556641,337158,503514,406844,100332594,793897,394012,317743,58143,393165	emp2,hdlbpa,rbp7b,tcap,cfl2,tfa,acaa2,hspb7,cfd,col6a2,fbln2,atp2a1l,ckma,krt91,pld1a,col1a1a,angptl2b,krt15,tgfbr3,psme4a,itga9,gapdh,mylz3,pdlim5b	2.97026e-05
msigdb	CROONQUIST_STROMAL_STIMULATION_UP	CROONQUIST_STROMAL_STIMULATION_UP	9.40814e-08	-16.1791	21	8	0.0506329	158	5159	405860,559066,337298,327067,321449,415209,336471,100535241	igfbp7,myofl,sulf1,slc25a4,ctgfa,tpm2,col1a2,thbs2a	3.66893e-05
msigdb	ESC_V6.5_UP_EARLY.V1_DN	ESC_V6.5_UP_EARLY.V1_DN	9.41433e-08	-16.1784	80	14	0.0886076	158	5159	447845,406844,337158,336655,445051,405860,561082,553503,562289,336471,559276,334724,321449,368419	sdprb,krt15,col1a1a,icn,krt91,igfbp7,ptrfb,fbln2,tfeb,col1a2,ahnak,anxa1a,ctgfa,ccdc80	3.66893e-05
msigdb	PICCALUGA_ANGIOIMMUNOBLASTIC_LYMPHOMA_UP	PICCALUGA_ANGIOIMMUNOBLASTIC_LYMPHOMA_UP	9.9574e-08	-16.1224	93	15	0.0949367	158	5159	368419,394012,570643,565429,286832,415209,336471,393165,337298,561082,791580,405860,556641,337158,321046	ccdc80,itga9,vwf,hspg2,lamc1,tpm2,col1a2,pdlim5b,sulf1,ptrfb,hspb8,igfbp7,pld1a,col1a1a,c3a.1	3.79801e-05
msigdb	MODULE_38	MODULE_38	1.08122e-07	-16.04	166	20	0.126582	158	5159	445506,100003572,790934,570643,553553,334724,567771,553503,565429,402957,336471,564821,337767,337158,114424,336655,100332594,60635,777750,415209	emp2,tnnt3b,mapkapk3,vwf,cfd,anxa1a,col6a2,fbln2,hspg2,cnksr1,col1a2,col5a2a,lamb2,col1a1a,cdh1,icn,tgfbr3,cldn7b,ece1,tpm2	4.03814e-05
msigdb	GO_A_BAND	GO_A_BAND	1.42513e-07	-15.7638	10	6	0.0379747	158	5159	572412,336425,100149390,431732,334269,494489	obscnb,aldoaa,lmod3,smpx,myom2a,atp2a1l	5.21392e-05
msigdb	CHEMELLO_SOLEUS_VS_EDL_MYOFIBERS_UP	CHEMELLO_SOLEUS_VS_EDL_MYOFIBERS_UP	2.00845e-07	-15.4207	16	7	0.0443038	158	5159	494489,399646,431732,393828,641575,550568,393940	atp2a1l,fhl1a,smpx,myoz2b,actn2b,pdlim1,atp2a2a	7.2011e-05
msigdb	ZHU_CMV_ALL_DN	ZHU_CMV_ALL_DN	2.57556e-07	-15.172	62	12	0.0759494	158	5159	286832,336471,100535241,415209,553553,100332594,334724,567771,337767,337158,564821,406658	lamc1,col1a2,thbs2a,tpm2,cfd,tgfbr3,anxa1a,col6a2,lamb2,col1a1a,col5a2a,cnn2	9.05334e-05
msigdb	GU_PDEF_TARGETS_UP	GU_PDEF_TARGETS_UP	2.89571e-07	-15.0549	32	9	0.056962	158	5159	337158,337767,568288,564821,100334431,30363,286832,567771,321449	col1a1a,lamb2,plce1,col5a2a,col5a1,fzd4,lamc1,col6a2,ctgfa	9.98295e-05
msigdb	GO_ADP_METABOLIC_PROCESS	GO_ADP_METABOLIC_PROCESS	3.14369e-07	-14.9727	24	8	0.0506329	158	5159	445486,572733,336425,321664,556578,246095,447836,317743	ak1,pgam2,aldoaa,aldob,ampd3a,gpib,pfkma,gapdh	0.000106334
msigdb	SENESE_HDAC2_TARGETS_DN	SENESE_HDAC2_TARGETS_DN	3.206e-07	-14.9531	52	11	0.0696203	158	5159	550568,415209,564821,445051,405860,393809,337158,336655,568288,406844,447845	pdlim1,tpm2,col5a2a,krt91,igfbp7,cap2,col1a1a,icn,plce1,krt15,sdprb	0.000106433
msigdb	GNF2_PTX3	GNF2_PTX3	3.32701e-07	-14.916	17	7	0.0443038	158	5159	564821,100334431,321449,337158,286832,336471,100535241	col5a2a,col5a1,ctgfa,col1a1a,lamc1,col1a2,thbs2a	0.000106506
msigdb	GNF2_CDH11	GNF2_CDH11	3.32701e-07	-14.916	17	7	0.0443038	158	5159	337158,100535241,336471,286832,567771,100334431,564821	col1a1a,thbs2a,col1a2,lamc1,col6a2,col5a1,col5a2a	0.000106506
msigdb	GO_STRIATED_MUSCLE_CONTRACTION	GO_STRIATED_MUSCLE_CONTRACTION	3.45584e-07	-14.878	42	10	0.0632911	158	5159	572733,393558,556258,336425,100003572,58143,415209,431732,58082,798565	pgam2,mb,tcap,aldoaa,tnnt3b,mylz3,tpm2,smpx,tnnc2,ryr1a	0.000108689
msigdb	MOOTHA_GLYCOLYSIS	MOOTHA_GLYCOLYSIS	5.05844e-07	-14.497	7	5	0.0316456	158	5159	572733,246095,336425,447836,321664	pgam2,gpib,aldoaa,pfkma,aldob	0.000153495
msigdb	CHEMELLO_SOLEUS_VS_EDL_MYOFIBERS_DN	CHEMELLO_SOLEUS_VS_EDL_MYOFIBERS_DN	5.05844e-07	-14.497	7	5	0.0316456	158	5159	100149766,334269,58082,100002040,100003572	tmod1,myom2a,tnnc2,myhb,tnnt3b	0.000153495
msigdb	PID_INTEGRIN1_PATHWAY	PID_INTEGRIN1_PATHWAY	5.13735e-07	-14.4816	34	9	0.056962	158	5159	564821,100334431,337767,337158,394012,567771,336471,100535241,286832	col5a2a,col5a1,lamb2,col1a1a,itga9,col6a2,col1a2,thbs2a,lamc1	0.000153495
msigdb	KEGG_GLYCOLYSIS_GLUCONEOGENESIS	KEGG_GLYCOLYSIS_GLUCONEOGENESIS	5.30493e-07	-14.4495	18	7	0.0443038	158	5159	321664,447836,317743,336425,246095,751785,572733	aldob,pfkma,gapdh,aldoaa,gpib,aldh1a3,pgam2	0.000155904
msigdb	GO_MUSCLE_CELL_DEVELOPMENT	GO_MUSCLE_CELL_DEVELOPMENT	5.52752e-07	-14.4084	44	10	0.0632911	158	5159	393940,572412,556258,403001,100149766,641575,30441,100149390,415209,393165	atp2a2a,obscnb,tcap,cfl2,tmod1,actn2b,tmod4,lmod3,tpm2,pdlim5b	0.000159826
msigdb	GO_EXTRACELLULAR_MATRIX	GO_EXTRACELLULAR_MATRIX	5.73446e-07	-14.3716	167	19	0.120253	158	5159	286832,100332594,321449,548602,337767,337158,405860,100001725,564821,553503,369195,565429,336471,100535241,570643,567771,368419,100536479,100334431	lamc1,tgfbr3,ctgfa,myoc,lamb2,col1a1a,igfbp7,emilin2a,col5a2a,fbln2,tgfb3,hspg2,col1a2,thbs2a,vwf,col6a2,ccdc80,podn,col5a1	0.000163177
msigdb	REACTOME_GLYCOLYSIS	REACTOME_GLYCOLYSIS	5.958e-07	-14.3334	12	6	0.0379747	158	5159	572733,317743,447836,321664,336425,246095	pgam2,gapdh,pfkma,aldob,aldoaa,gpib	0.000166889
msigdb	GO_REGULATION_OF_ACTIN_FILAMENT_BASED_PROCESS	GO_REGULATION_OF_ACTIN_FILAMENT_BASED_PROCESS	6.97858e-07	-14.1752	122	16	0.101266	158	5159	415209,798565,321449,100004946,548602,641575,323696,100149390,30441,568593,100149766,560668,403009,403001,393940,406658	tpm2,ryr1a,ctgfa,trpm4a,myoc,actn2b,f11r.1,lmod3,tmod4,sdc4,tmod1,phldb2b,ezra,cfl2,atp2a2a,cnn2	0.000192469
msigdb	GO_HEXOSE_CATABOLIC_PROCESS	GO_HEXOSE_CATABOLIC_PROCESS	8.18468e-07	-14.0158	19	7	0.0443038	158	5159	317743,447836,321664,336425,246095,572733,560297	gapdh,pfkma,aldob,aldoaa,gpib,pgam2,pgm5	0.000222313
msigdb	GO_TITIN_BINDING	GO_TITIN_BINDING	8.47727e-07	-13.9807	4	4	0.0253165	158	5159	572412,556258,492356,641575	obscnb,tcap,mybpc1,actn2b	0.000226824
msigdb	HALLMARK_HYPOXIA	HALLMARK_HYPOXIA	9.1111e-07	-13.9086	82	13	0.0822785	158	5159	321664,336425,794178,561082,100334431,572733,336655,568593,317743,246095,321449,369195,556578	aldob,aldoaa,hdlbpa,ptrfb,col5a1,pgam2,icn,sdc4,gapdh,gpib,ctgfa,tgfb3,ampd3a	0.000240198
msigdb	MODULE_1	MODULE_1	1.03707e-06	-13.7791	141	17	0.107595	158	5159	799650,445506,393809,567771,334724,553553,570643,336471,100535241,565429,564821,337158,337767,503514,100332594,393165,415209	ddx21,emp2,cap2,col6a2,anxa1a,cfd,vwf,col1a2,thbs2a,hspg2,col5a2a,col1a1a,lamb2,angptl2b,tgfbr3,pdlim5b,tpm2	0.000269442
msigdb	GO_GLUCOSE_CATABOLIC_PROCESS	GO_GLUCOSE_CATABOLIC_PROCESS	1.07857e-06	-13.7399	13	6	0.0379747	158	5159	246095,336425,317743,321664,447836,572733	gpib,aldoaa,gapdh,aldob,pfkma,pgam2	0.000276223
msigdb	GO_NUCLEOTIDE_PHOSPHORYLATION	GO_NUCLEOTIDE_PHOSPHORYLATION	1.1966e-06	-13.636	28	8	0.0506329	158	5159	246095,317743,447836,445486,572733,336425,30084,321664	gpib,gapdh,pfkma,ak1,pgam2,aldoaa,nme2b.2,aldob	0.000301772
msigdb	V$SRF_Q5_01	V$SRF_Q5_01	1.212e-06	-13.6232	84	13	0.0822785	158	5159	100001725,406658,30095,403001,565849,337158,373076,447845,100536479,327067,335370,393165,393347	emilin2a,cnn2,ckma,cfl2,ppp2r3a,col1a1a,tpm3,sdprb,podn,slc25a4,eef1b2,pdlim5b,fgfrl1a	0.000301772
msigdb	GO_SARCOMERE_ORGANIZATION	GO_SARCOMERE_ORGANIZATION	1.31558e-06	-13.5412	8	5	0.0316456	158	5159	403001,572412,556258,415209,641575	cfl2,obscnb,tcap,tpm2,actn2b	0.000318709
msigdb	HUMMERICH_MALIGNANT_SKIN_TUMOR_DN	HUMMERICH_MALIGNANT_SKIN_TUMOR_DN	1.31558e-06	-13.5412	8	5	0.0316456	158	5159	553553,30095,100003572,494489,58082	cfd,ckma,tnnt3b,atp2a1l,tnnc2	0.000318709
msigdb	GO_BIOLOGICAL_ADHESION	GO_BIOLOGICAL_ADHESION	1.35733e-06	-13.51	325	27	0.170886	158	5159	337767,641575,114424,323696,252849,405860,100001725,286832,393347,30363,394012,321449,60635,560297,492356,403009,30084,100334431,445506,393940,406454,100535241,751793,570643,569088,334724,567771	lamb2,actn2b,cdh1,f11r.1,thbs3a,igfbp7,emilin2a,lamc1,fgfrl1a,fzd4,itga9,ctgfa,cldn7b,pgm5,mybpc1,ezra,nme2b.2,col5a1,emp2,atp2a2a,epcam,thbs2a,mybpc2a,vwf,pdzd2,anxa1a,col6a2	0.000324437
msigdb	GO_PROTEINACEOUS_EXTRACELLULAR_MATRIX	GO_PROTEINACEOUS_EXTRACELLULAR_MATRIX	1.4001e-06	-13.479	144	17	0.107595	158	5159	337767,548602,337158,100001725,564821,286832,100332594,321449,100536479,100334431,553503,565429,100535241,336471,570643,567771,368419	lamb2,myoc,col1a1a,emilin2a,col5a2a,lamc1,tgfbr3,ctgfa,podn,col5a1,fbln2,hspg2,thbs2a,col1a2,vwf,col6a2,ccdc80	0.000330257
msigdb	MODULE_60	MODULE_60	1.54453e-06	-13.3808	145	17	0.107595	158	5159	30095,336655,337767,777750,393165,100003572,321664,393558,790934,572733,553553,567771,570643,565429,553503,402957,336471	ckma,icn,lamb2,ece1,pdlim5b,tnnt3b,aldob,mb,mapkapk3,pgam2,cfd,col6a2,vwf,hspg2,fbln2,cnksr1,col1a2	0.000359595
msigdb	GO_SECRETORY_GRANULE_LUMEN	GO_SECRETORY_GRANULE_LUMEN	1.60982e-06	-13.3394	29	8	0.0506329	158	5159	553553,570643,393730,369195,353221,336425,641575,30255	cfd,vwf,scg3,tgfb3,pomca,aldoaa,actn2b,tfa	0.000369991
msigdb	SWEET_LUNG_CANCER_KRAS_DN	SWEET_LUNG_CANCER_KRAS_DN	2.06236e-06	-13.0917	148	17	0.107595	158	5159	321664,445506,393940,100003572,321046,399646,559276,570643,553553,567771,336471,561082,503514,447845,337158,567674,550568	aldob,emp2,atp2a2a,tnnt3b,c3a.1,fhl1a,ahnak,vwf,cfd,col6a2,col1a2,ptrfb,angptl2b,sdprb,col1a1a,lats2,pdlim1	0.000468
msigdb	TATAAA_V$TATA_01	TATAAA_V$TATA_01	2.28417e-06	-12.9895	375	29	0.183544	158	5159	317743,321449,100004946,407639,58143,100002040,445051,100001408,548602,406844,373076,641575,337158,336655,327067,568032,569088,334724,369195,100535241,336471,561450,321035,403001,321664,337298,393611,450019,393867	gapdh,ctgfa,trpm4a,gh1,mylz3,myhb,krt91,apcdd1l,myoc,krt15,tpm3,actn2b,col1a1a,icn,slc25a4,rbp2a,pdzd2,anxa1a,tgfb3,thbs2a,col1a2,plag1,pabpc4,cfl2,aldob,sulf1,c6,hspb7,ampd1	0.000511853
msigdb	MARTINEZ_TP53_TARGETS_UP	MARTINEZ_TP53_TARGETS_UP	2.85259e-06	-12.7673	203	20	0.126582	158	5159	406325,450019,30255,403001,794178,445506,569308,556258,553503,494489,553553,503514,556641,30095,58143,393165,793897,394012,317743,100332594	acaa2,hspb7,tfa,cfl2,hdlbpa,emp2,rbp7b,tcap,fbln2,atp2a1l,cfd,angptl2b,pld1a,ckma,mylz3,pdlim5b,psme4a,itga9,gapdh,tgfbr3	0.000616126
msigdb	GO_NUCLEOSIDE_DIPHOSPHATE_METABOLIC_PROCESS	GO_NUCLEOSIDE_DIPHOSPHATE_METABOLIC_PROCESS	2.85446e-06	-12.7666	41	9	0.056962	158	5159	336425,30084,321664,445486,572733,246095,317743,447836,556578	aldoaa,nme2b.2,aldob,ak1,pgam2,gpib,gapdh,pfkma,ampd3a	0.000616126
msigdb	GO_M_BAND	GO_M_BAND	2.88696e-06	-12.7553	9	5	0.0316456	158	5159	431732,334269,100149390,572412,336425	smpx,myom2a,lmod3,obscnb,aldoaa	0.000616126
msigdb	GNF2_MYL3	GNF2_MYL3	2.88696e-06	-12.7553	9	5	0.0316456	158	5159	445486,393828,100001241,572733,450019	ak1,myoz2b,synpo2lb,pgam2,hspb7	0.000616126
msigdb	GO_SARCOPLASMIC_RETICULUM_MEMBRANE	GO_SARCOPLASMIC_RETICULUM_MEMBRANE	2.98922e-06	-12.7205	15	6	0.0379747	158	5159	798565,393940,393874,561350,494489,553333	ryr1a,atp2a2a,tmem38a,ryr3,atp2a1l,jph2	0.00062448
msigdb	MODULE_5	MODULE_5	2.99578e-06	-12.7183	152	17	0.107595	158	5159	449936,100332594,60635,415209,561082,337767,336655,570643,334724,553553,567771,565429,406454,336471,445506,799650,790934	ppl,tgfbr3,cldn7b,tpm2,ptrfb,lamb2,icn,vwf,anxa1a,cfd,col6a2,hspg2,epcam,col1a2,emp2,ddx21,mapkapk3	0.00062448
msigdb	MARTINEZ_RB1_AND_TP53_TARGETS_UP	MARTINEZ_RB1_AND_TP53_TARGETS_UP	3.32408e-06	-12.6143	205	20	0.126582	158	5159	494489,553553,30255,406325,450019,794178,569308,445506,393940,556258,403001,58143,393165,100332594,793897,317743,394012,503514,30095,556641	atp2a1l,cfd,tfa,acaa2,hspb7,hdlbpa,rbp7b,emp2,atp2a2a,tcap,cfl2,mylz3,pdlim5b,tgfbr3,psme4a,gapdh,itga9,angptl2b,ckma,pld1a	0.000684951
msigdb	GO_MONOSACCHARIDE_CATABOLIC_PROCESS	GO_MONOSACCHARIDE_CATABOLIC_PROCESS	3.59044e-06	-12.5372	23	7	0.0443038	158	5159	560297,572733,447836,321664,317743,336425,246095	pgm5,pgam2,pfkma,aldob,gapdh,aldoaa,gpib	0.000731429
msigdb	V$MEF2_02	V$MEF2_02	3.88905e-06	-12.4573	79	12	0.0759494	158	5159	30095,565849,393867,336655,334269,100001241,321449,327067,58082,393828,431732,58143	ckma,ppp2r3a,ampd1,icn,myom2a,synpo2lb,ctgfa,slc25a4,tnnc2,myoz2b,smpx,mylz3	0.00078336
msigdb	HALLMARK_EPITHELIAL_MESENCHYMAL_TRANSITION	HALLMARK_EPITHELIAL_MESENCHYMAL_TRANSITION	4.47312e-06	-12.3174	94	13	0.0822785	158	5159	336471,100535241,415209,553503,286832,321449,567771,100332594,568593,393809,337158,100334431,564821	col1a2,thbs2a,tpm2,fbln2,lamc1,ctgfa,col6a2,tgfbr3,sdc4,cap2,col1a1a,col5a1,col5a2a	0.000881204
msigdb	GO_NUCLEOSIDE_MONOPHOSPHATE_METABOLIC_PROCESS	GO_NUCLEOSIDE_MONOPHOSPHATE_METABOLIC_PROCESS	4.47312e-06	-12.3174	94	13	0.0822785	158	5159	572733,445486,393867,321664,393586,336425,100002040,556578,447836,317743,100334492,407989,246095	pgam2,ak1,ampd1,aldob,hsc70,aldoaa,myhb,ampd3a,pfkma,gapdh,entpd5b,adssl1,gpib	0.000881204
msigdb	BOSCO_EPITHELIAL_DIFFERENTIATION_MODULE	BOSCO_EPITHELIAL_DIFFERENTIATION_MODULE	4.66224e-06	-12.276	16	6	0.0379747	158	5159	449936,445051,791580,60635,445506,406844	ppl,krt91,hspb8,cldn7b,emp2,krt15	0.000904217
msigdb	GO_RIBONUCLEOSIDE_DIPHOSPHATE_METABOLIC_PROCESS	GO_RIBONUCLEOSIDE_DIPHOSPHATE_METABOLIC_PROCESS	4.69081e-06	-12.2699	33	8	0.0506329	158	5159	556578,317743,447836,246095,572733,445486,321664,336425	ampd3a,gapdh,pfkma,gpib,pgam2,ak1,aldob,aldoaa	0.000904217
msigdb	GO_NUCLEOSIDE_TRIPHOSPHATE_METABOLIC_PROCESS	GO_NUCLEOSIDE_TRIPHOSPHATE_METABOLIC_PROCESS	5.09354e-06	-12.1875	81	12	0.0759494	158	5159	317743,100334492,447836,246095,100002040,556578,30084,393586,321664,336425,572733,445486	gapdh,entpd5b,pfkma,gpib,myhb,ampd3a,nme2b.2,hsc70,aldob,aldoaa,pgam2,ak1	0.000971404
msigdb	DAIRKEE_CANCER_PRONE_RESPONSE_BPA_E2	DAIRKEE_CANCER_PRONE_RESPONSE_BPA_E2	5.33815e-06	-12.1406	44	9	0.056962	158	5159	447845,406325,572733,336655,790934,317743,393874,415209,58082	sdprb,acaa2,pgam2,icn,mapkapk3,gapdh,tmem38a,tpm2,tnnc2	0.00100734
msigdb	GO_EXTRACELLULAR_SPACE	GO_EXTRACELLULAR_SPACE	5.90407e-06	-12.0399	330	26	0.164557	158	5159	567771,553553,334724,30723,336471,565429,369195,337298,794178,353221,403001,403009,30255,100536479,321046,246095,321449,100332594,286832,336425,405860,393586,336655,337158,503514,548602	col6a2,cfd,anxa1a,tpt1,col1a2,hspg2,tgfb3,sulf1,hdlbpa,pomca,cfl2,ezra,tfa,podn,c3a.1,gpib,ctgfa,tgfbr3,lamc1,aldoaa,igfbp7,hsc70,icn,col1a1a,angptl2b,myoc	0.00110252
msigdb	GO_VESICLE_LUMEN	GO_VESICLE_LUMEN	5.97607e-06	-12.0277	34	8	0.0506329	158	5159	353221,336425,641575,30255,553553,570643,393730,369195	pomca,aldoaa,actn2b,tfa,cfd,vwf,scg3,tgfb3	0.00110446
msigdb	BOQUEST_STEM_CELL_UP	BOQUEST_STEM_CELL_UP	6.39154e-06	-11.9605	97	13	0.0822785	158	5159	564821,100334431,791580,336655,337158,393611,321046,548602,567771,553553,449936,100535241,336471	col5a2a,col5a1,hspb8,icn,col1a1a,c6,c3a.1,myoc,col6a2,cfd,ppl,thbs2a,col1a2	0.00115393
msigdb	SENESE_HDAC1_AND_HDAC2_TARGETS_DN	SENESE_HDAC1_AND_HDAC2_TARGETS_DN	6.39154e-06	-11.9605	97	13	0.0822785	158	5159	564821,445051,405860,393809,337158,336655,337767,568288,447845,406844,368419,550568,415209	col5a2a,krt91,igfbp7,cap2,col1a1a,icn,lamb2,plce1,sdprb,krt15,ccdc80,pdlim1,tpm2	0.00115393
msigdb	NABA_MATRISOME	NABA_MATRISOME	6.46359e-06	-11.9493	291	24	0.151899	158	5159	564821,100001725,405860,252849,336655,337158,337767,503514,407639,321449,101882427,286832,100334431,337298,568593,100536479,567771,334724,570643,100535241,336471,565429,369195,553503	col5a2a,emilin2a,igfbp7,thbs3a,icn,col1a1a,lamb2,angptl2b,gh1,ctgfa,vwa5b2,lamc1,col5a1,sulf1,sdc4,podn,col6a2,anxa1a,vwf,thbs2a,col1a2,hspg2,tgfb3,fbln2	0.00115393
msigdb	MODULE_2	MODULE_2	6.50118e-06	-11.9435	144	16	0.101266	158	5159	570643,567771,334724,553553,100535241,336471,751785,565429,553503,799650,445506,393809,100332594,415209,337767,336655	vwf,col6a2,anxa1a,cfd,thbs2a,col1a2,aldh1a3,hspg2,fbln2,ddx21,emp2,cap2,tgfbr3,tpm2,lamb2,icn	0.00115393
msigdb	GO_EXTRACELLULAR_STRUCTURE_ORGANIZATION	GO_EXTRACELLULAR_STRUCTURE_ORGANIZATION	7.32818e-06	-11.8238	129	15	0.0949367	158	5159	286832,565429,336471,321449,567771,368419,394012,570643,337158,114424,337767,337298,564821,100334431,323696	lamc1,hspg2,col1a2,ctgfa,col6a2,ccdc80,itga9,vwf,col1a1a,cdh1,lamb2,sulf1,col5a2a,col5a1,f11r.1	0.00128796
msigdb	LANDIS_BREAST_CANCER_PROGRESSION_DN	LANDIS_BREAST_CANCER_PROGRESSION_DN	7.54717e-06	-11.7943	35	8	0.0506329	158	5159	100334431,791580,337158,503514,368419,570643,559276,30363	col5a1,hspb8,col1a1a,angptl2b,ccdc80,vwf,ahnak,fzd4	0.00131357
msigdb	CAGGTG_V$E12_Q6	CAGGTG_V$E12_Q6	8.86468e-06	-11.6334	855	48	0.303797	158	5159	100003572,337298,100533983,794178,568593,393558,406325,100536479,560297,569088,570643,336471,562289,336425,564500,30095,252849,114424,562991,373076,407730,60635,317743,30363,114426,353221,436921,791580,100149766,393867,100001241,561350,562279,30441,321035,561450,58082,795398,406454,369195,436585,445051,553665,641575,337158,447845,406844,393347	tnnt3b,sulf1,eml3,hdlbpa,sdc4,mb,acaa2,podn,pgm5,pdzd2,vwf,col1a2,tfeb,aldoaa,scara5,ckma,thbs3a,cdh1,rbm47,tpm3,chchd3a,cldn7b,gapdh,fzd4,odc1,pomca,slc38a5b,hspb8,tmod1,ampd1,synpo2lb,ryr3,myo19,tmod4,pabpc4,plag1,tnnc2,ybx1,epcam,tgfb3,hic1,krt91,cnot6l,actn2b,col1a1a,sdprb,krt15,fgfrl1a	0.00152805
msigdb	KEGG_FOCAL_ADHESION	KEGG_FOCAL_ADHESION	9.64427e-06	-11.5491	86	12	0.0759494	158	5159	252849,100334431,564821,337767,641575,337158,570643,394012,567771,100535241,336471,286832	thbs3a,col5a1,col5a2a,lamb2,actn2b,col1a1a,vwf,itga9,col6a2,thbs2a,col1a2,lamc1	0.0016466
msigdb	MODULE_47	MODULE_47	1.00632e-05	-11.5066	101	13	0.0822785	158	5159	405860,406658,561082,564821,337158,570643,321449,567771,100535241,336471,415209,751785,553503	igfbp7,cnn2,ptrfb,col5a2a,col1a1a,vwf,ctgfa,col6a2,thbs2a,col1a2,tpm2,aldh1a3,fbln2	0.00167146
msigdb	MODULE_202	MODULE_202	1.00696e-05	-11.506	11	5	0.0316456	158	5159	751793,334269,58143,100003572,492356	mybpc2a,myom2a,mylz3,tnnt3b,mybpc1	0.00167146
msigdb	AIGNER_ZEB1_TARGETS	AIGNER_ZEB1_TARGETS	1.00696e-05	-11.506	11	5	0.0316456	158	5159	60635,323696,449936,114424,406454	cldn7b,f11r.1,ppl,cdh1,epcam	0.00167146
msigdb	GO_ATP_GENERATION_FROM_ADP	GO_ATP_GENERATION_FROM_ADP	1.02705e-05	-11.4862	18	6	0.0379747	158	5159	246095,336425,317743,321664,447836,572733	gpib,aldoaa,gapdh,aldob,pfkma,pgam2	0.00167381
msigdb	GO_NADH_METABOLIC_PROCESS	GO_NADH_METABOLIC_PROCESS	1.02705e-05	-11.4862	18	6	0.0379747	158	5159	317743,447836,321664,336425,246095,572733	gapdh,pfkma,aldob,aldoaa,gpib,pgam2	0.00167381
msigdb	MODULE_88	MODULE_88	1.08988e-05	-11.4269	260	22	0.139241	158	5159	100001241,393611,572733,100003572,321664,445175,406454,751785,553503,565429,336471,402957,553553,567771,570643,337158,336655,114424,337767,564821,60635,449936	synpo2lb,c6,pgam2,tnnt3b,aldob,acsl1b,epcam,aldh1a3,fbln2,hspg2,col1a2,cnksr1,cfd,col6a2,vwf,col1a1a,icn,cdh1,lamb2,col5a2a,cldn7b,ppl	0.0017602
msigdb	LINDGREN_BLADDER_CANCER_CLUSTER_2B	LINDGREN_BLADDER_CANCER_CLUSTER_2B	1.10409e-05	-11.4139	150	16	0.101266	158	5159	553503,336471,100535241,368419,567771,562062,399646,403001,415209,321449,567674,337767,503514,561082,564821,405860	fbln2,col1a2,thbs2a,ccdc80,col6a2,socs2,fhl1a,cfl2,tpm2,ctgfa,lats2,lamb2,angptl2b,ptrfb,col5a2a,igfbp7	0.00176724
msigdb	DELASERNA_MYOD_TARGETS_UP	DELASERNA_MYOD_TARGETS_UP	1.17276e-05	-11.3536	27	7	0.0443038	158	5159	58082,58143,494489,30095,100003572,791580,403001	tnnc2,mylz3,atp2a1l,ckma,tnnt3b,hspb8,cfl2	0.00186054
msigdb	GO_TROPOMYOSIN_BINDING	GO_TROPOMYOSIN_BINDING	1.21156e-05	-11.321	6	4	0.0253165	158	5159	30441,100003572,100149390,100149766	tmod4,tnnt3b,lmod3,tmod1	0.00190524
msigdb	REACTOME_NCAM1_INTERACTIONS	REACTOME_NCAM1_INTERACTIONS	1.46329e-05	-11.1322	19	6	0.0379747	158	5159	567771,100334431,564821,405791,337158,336471	col6a2,col5a1,col5a2a,cacna1sb,col1a1a,col1a2	0.00228108
msigdb	GOTZMANN_EPITHELIAL_TO_MESENCHYMAL_TRANSITION_UP	GOTZMANN_EPITHELIAL_TO_MESENCHYMAL_TRANSITION_UP	1.5238e-05	-11.0917	28	7	0.0443038	158	5159	405860,564821,321449,369195,553503,114426,337158	igfbp7,col5a2a,ctgfa,tgfb3,fbln2,odc1,col1a1a	0.00235493
msigdb	REACTOME_GLUCONEOGENESIS	REACTOME_GLUCONEOGENESIS	1.68366e-05	-10.992	12	5	0.0316456	158	5159	246095,336425,321664,317743,572733	gpib,aldoaa,aldob,gapdh,pgam2	0.00257973
msigdb	P53_DN.V1_UP	P53_DN.V1_UP	1.72417e-05	-10.9682	63	10	0.0632911	158	5159	334724,449936,336471,406454,553503,337298,559066,568593,568288,337767	anxa1a,ppl,col1a2,epcam,fbln2,sulf1,myofl,sdc4,plce1,lamb2	0.00261942
msigdb	VERHAAK_GLIOBLASTOMA_MESENCHYMAL	VERHAAK_GLIOBLASTOMA_MESENCHYMAL	1.95189e-05	-10.8441	92	12	0.0759494	158	5159	337401,337158,336655,562991,553407,561082,100334431,406658,559066,556578,336471,334724	ehd2b,col1a1a,icn,rbm47,sec24d,ptrfb,col5a1,cnn2,myofl,ampd3a,col1a2,anxa1a	0.00294046
msigdb	GO_PURINE_CONTAINING_COMPOUND_METABOLIC_PROCESS	GO_PURINE_CONTAINING_COMPOUND_METABOLIC_PROCESS	1.97593e-05	-10.8319	157	16	0.101266	158	5159	393586,796865,336425,100002040,447836,100334492,317743,246095,407989,572733,445486,393867,321664,30084,260441,556578	hsc70,gamt,aldoaa,myhb,pfkma,entpd5b,gapdh,gpib,adssl1,pgam2,ak1,ampd1,aldob,nme2b.2,mthfd1b,ampd3a	0.00294872
msigdb	IGLESIAS_E2F_TARGETS_UP	IGLESIAS_E2F_TARGETS_UP	1.99027e-05	-10.8247	64	10	0.0632911	158	5159	503514,321046,337158,564821,336471,553503,327067,567771,334724,553553	angptl2b,c3a.1,col1a1a,col5a2a,col1a2,fbln2,slc25a4,col6a2,anxa1a,cfd	0.00294872
msigdb	GSE22443_NAIVE_VS_ACT_AND_IL2_TREATED_CD8_TCELL_DN	GSE22443_NAIVE_VS_ACT_AND_IL2_TREATED_CD8_TCELL_DN	2.0741e-05	-10.7834	78	11	0.0696203	158	5159	794178,404627,323696,321046,399646,368419,449936,447836,553527,369195,751785	hdlbpa,six1b,f11r.1,c3a.1,fhl1a,ccdc80,ppl,pfkma,mlf1,tgfb3,aldh1a3	0.00304773
msigdb	SCHUETZ_BREAST_CANCER_DUCTAL_INVASIVE_UP	SCHUETZ_BREAST_CANCER_DUCTAL_INVASIVE_UP	2.17951e-05	-10.7338	141	15	0.0949367	158	5159	405860,337298,564821,100334431,561082,503514,337158,336655,334724,321449,567771,286832,553503,336471,100535241	igfbp7,sulf1,col5a2a,col5a1,ptrfb,angptl2b,col1a1a,icn,anxa1a,ctgfa,col6a2,lamc1,fbln2,col1a2,thbs2a	0.00317659
msigdb	GO_MUSCLE_STRUCTURE_DEVELOPMENT	GO_MUSCLE_STRUCTURE_DEVELOPMENT	2.318e-05	-10.6722	159	16	0.101266	158	5159	415209,393165,393347,798565,100332594,641575,565849,100149390,30441,399646,100149766,403001,404627,393940,556258,572412	tpm2,pdlim5b,fgfrl1a,ryr1a,tgfbr3,actn2b,ppp2r3a,lmod3,tmod4,fhl1a,tmod1,cfl2,six1b,atp2a2a,tcap,obscnb	0.0033512
msigdb	GO_CYTOSKELETON	GO_CYTOSKELETON	2.46208e-05	-10.6119	634	38	0.240506	158	5159	450019,560297,492356,403009,406658,100003572,100533983,30723,114424,567674,373076,336425,393165,100002040,317743,449936,393367,100001241,100149766,560668,403001,321664,751793,393828,58082,100149390,559276,562279,30441,406844,334269,641575,393586,323696,445051,58143,415209,550568	hspb7,pgm5,mybpc1,ezra,cnn2,tnnt3b,eml3,tpt1,cdh1,lats2,tpm3,aldoaa,pdlim5b,myhb,gapdh,ppl,coro6,synpo2lb,tmod1,phldb2b,cfl2,aldob,mybpc2a,myoz2b,tnnc2,lmod3,ahnak,myo19,tmod4,krt15,myom2a,actn2b,hsc70,f11r.1,krt91,mylz3,tpm2,pdlim1	0.00353102
msigdb	REACTOME_RESPONSE_TO_ELEVATED_PLATELET_CYTOSOLIC_CA2_	REACTOME_RESPONSE_TO_ELEVATED_PLATELET_CYTOSOLIC_CA2_	2.48807e-05	-10.6014	30	7	0.0443038	158	5159	570643,553553,336425,369195,641575,393730,30255	vwf,cfd,aldoaa,tgfb3,actn2b,scg3,tfa	0.00353997
msigdb	GO_CELL_SUBSTRATE_JUNCTION	GO_CELL_SUBSTRATE_JUNCTION	2.508e-05	-10.5934	160	16	0.101266	158	5159	403009,30084,406658,399646,560297,560668,568593,559276,334724,565429,337010,393586,641575,114424,550568,431732	ezra,nme2b.2,cnn2,fhl1a,pgm5,phldb2b,sdc4,ahnak,anxa1a,hspg2,rpl7a,hsc70,actn2b,cdh1,pdlim1,smpx	0.00354023
msigdb	GSE26912_TUMORICIDAL_VS_CTRL_MACROPHAGE_UP	GSE26912_TUMORICIDAL_VS_CTRL_MACROPHAGE_UP	2.64978e-05	-10.5384	80	11	0.0696203	158	5159	327067,449936,368419,553503,30363,556641,404627,403001,393940,436585,572733	slc25a4,ppl,ccdc80,fbln2,fzd4,pld1a,six1b,cfl2,atp2a2a,hic1,pgam2	0.0036799
msigdb	GO_CYTOSKELETON_ORGANIZATION	GO_CYTOSKELETON_ORGANIZATION	2.65113e-05	-10.5379	275	22	0.139241	158	5159	30441,334724,100149390,406658,556258,572412,445506,403001,403009,100149766,393809,560668,568288,317743,393367,415209,336425,445051,323696,641575,337401,406844	tmod4,anxa1a,lmod3,cnn2,tcap,obscnb,emp2,cfl2,ezra,tmod1,cap2,phldb2b,plce1,gapdh,coro6,tpm2,aldoaa,krt91,f11r.1,actn2b,ehd2b,krt15	0.0036799
msigdb	MOOTHA_GLUCONEOGENESIS	MOOTHA_GLUCONEOGENESIS	2.66853e-05	-10.5314	13	5	0.0316456	158	5159	336425,246095,447836,321664,572733	aldoaa,gpib,pfkma,aldob,pgam2	0.0036799
msigdb	THUM_MIR21_TARGETS_HEART_DISEASE_UP	THUM_MIR21_TARGETS_HEART_DISEASE_UP	2.75953e-05	-10.4979	7	4	0.0253165	158	5159	336471,369195,337158,564821	col1a2,tgfb3,col1a1a,col5a2a	0.00372083
msigdb	GO_BANDED_COLLAGEN_FIBRIL	GO_BANDED_COLLAGEN_FIBRIL	2.75953e-05	-10.4979	7	4	0.0253165	158	5159	336471,337158,564821,100334431	col1a2,col1a1a,col5a2a,col5a1	0.00372083
msigdb	GO_NAD_METABOLIC_PROCESS	GO_NAD_METABOLIC_PROCESS	2.78123e-05	-10.49	21	6	0.0379747	158	5159	246095,336425,317743,447836,321664,572733	gpib,aldoaa,gapdh,pfkma,aldob,pgam2	0.00372083
msigdb	CROMER_TUMORIGENESIS_UP	CROMER_TUMORIGENESIS_UP	2.78123e-05	-10.49	21	6	0.0379747	158	5159	445051,564821,406844,336471,114426,337158	krt91,col5a2a,krt15,col1a2,odc1,col1a1a	0.00372083
msigdb	ZHONG_SECRETOME_OF_LUNG_CANCER_AND_FIBROBLAST	ZHONG_SECRETOME_OF_LUNG_CANCER_AND_FIBROBLAST	3.15329e-05	-10.3645	42	8	0.0506329	158	5159	336425,337158,568593,114424,30255,572733,246095,30723	aldoaa,col1a1a,sdc4,cdh1,tfa,pgam2,gpib,tpt1	0.00415655
msigdb	REACTOME_INTEGRIN_CELL_SURFACE_INTERACTIONS	REACTOME_INTEGRIN_CELL_SURFACE_INTERACTIONS	3.15329e-05	-10.3645	42	8	0.0506329	158	5159	337767,337158,114424,323696,286832,336471,570643,394012	lamb2,col1a1a,cdh1,f11r.1,lamc1,col1a2,vwf,itga9	0.00415655
msigdb	MODULE_122	MODULE_122	3.58683e-05	-10.2357	55	9	0.056962	158	5159	321449,567771,570643,100535241,564821,100334431,114424,337158,337767	ctgfa,col6a2,vwf,thbs2a,col5a2a,col5a1,cdh1,col1a1a,lamb2	0.00469351
msigdb	MODULE_387	MODULE_387	3.72807e-05	-10.197	22	6	0.0379747	158	5159	334269,399646,58143,336425,100003572,492356	myom2a,fhl1a,mylz3,aldoaa,tnnt3b,mybpc1	0.00480814
msigdb	MODULE_329	MODULE_329	3.72807e-05	-10.197	22	6	0.0379747	158	5159	492356,336425,100003572,58143,399646,334269	mybpc1,aldoaa,tnnt3b,mylz3,fhl1a,myom2a	0.00480814
msigdb	V$SRF_C	V$SRF_C	3.77084e-05	-10.1856	83	11	0.0696203	158	5159	327067,336471,393165,393347,403001,565849,100001725,30095,406658,553333,373076	slc25a4,col1a2,pdlim5b,fgfrl1a,cfl2,ppp2r3a,emilin2a,ckma,cnn2,jph2,tpm3	0.00482856
msigdb	ANASTASSIOU_CANCER_MESENCHYMAL_TRANSITION_SIGNATURE	ANASTASSIOU_CANCER_MESENCHYMAL_TRANSITION_SIGNATURE	3.90664e-05	-10.1502	32	7	0.0443038	158	5159	100334431,337298,564821,567771,337158,336471,100535241	col5a1,sulf1,col5a2a,col6a2,col1a1a,col1a2,thbs2a	0.00496697
msigdb	GO_GLYCOSYL_COMPOUND_METABOLIC_PROCESS	GO_GLYCOSYL_COMPOUND_METABOLIC_PROCESS	3.94172e-05	-10.1413	131	14	0.0886076	158	5159	445486,572733,336425,393586,321664,796865,30084,556578,100002040,246095,407989,447836,317743,100334492	ak1,pgam2,aldoaa,hsc70,aldob,gamt,nme2b.2,ampd3a,myhb,gpib,adssl1,pfkma,gapdh,entpd5b	0.00497628
msigdb	GSE27670_CTRL_VS_BLIMP1_TRANSDUCED_GC_BCELL_DN	GSE27670_CTRL_VS_BLIMP1_TRANSDUCED_GC_BCELL_DN	4.2258e-05	-10.0717	84	11	0.0696203	158	5159	561350,369195,406454,100535241,30363,404627,403001,323696,564821,794178,393940	ryr3,tgfb3,epcam,thbs2a,fzd4,six1b,cfl2,f11r.1,col5a2a,hdlbpa,atp2a2a	0.00529762
msigdb	GO_EXTRACELLULAR_MATRIX_COMPONENT	GO_EXTRACELLULAR_MATRIX_COMPONENT	4.81563e-05	-9.94106	57	9	0.056962	158	5159	100334431,564821,337767,337158,368419,286832,565429,100535241,336471	col5a1,col5a2a,lamb2,col1a1a,ccdc80,lamc1,hspg2,thbs2a,col1a2	0.00596153
msigdb	GO_CALCIUM_ION_BINDING	GO_CALCIUM_ION_BINDING	4.8219e-05	-9.93976	206	18	0.113924	158	5159	58143,798565,337401,641575,336655,114424,565849,252849,30723,58082,565429,553503,494489,100535241,334724,561350,337298,393940	mylz3,ryr1a,ehd2b,actn2b,icn,cdh1,ppp2r3a,thbs3a,tpt1,tnnc2,hspg2,fbln2,atp2a1l,thbs2a,anxa1a,ryr3,sulf1,atp2a2a	0.00596153
msigdb	MODULE_201	MODULE_201	4.91714e-05	-9.9202	23	6	0.0379747	158	5159	334269,751793,58143,336425,100003572,492356	myom2a,mybpc2a,mylz3,aldoaa,tnnt3b,mybpc1	0.00603764
msigdb	NABA_ECM_GLYCOPROTEINS	NABA_ECM_GLYCOPROTEINS	5.04468e-05	-9.89459	71	10	0.0632911	158	5159	286832,553503,100535241,570643,101882427,321449,337767,405860,252849,100001725	lamc1,fbln2,thbs2a,vwf,vwa5b2,ctgfa,lamb2,igfbp7,thbs3a,emilin2a	0.00615211
msigdb	GO_REGULATION_OF_MUSCLE_CONTRACTION	GO_REGULATION_OF_MUSCLE_CONTRACTION	5.55261e-05	-9.79866	58	9	0.056962	158	5159	393940,100003572,568288,798565,321449,100004946,415209,494489,58082	atp2a2a,tnnt3b,plce1,ryr1a,ctgfa,trpm4a,tpm2,atp2a1l,tnnc2	0.00672578
msigdb	WONG_ADULT_TISSUE_STEM_MODULE	WONG_ADULT_TISSUE_STEM_MODULE	5.59589e-05	-9.79089	268	21	0.132911	158	5159	286832,415209,798565,321449,548602,447845,337158,567674,336655,393586,405860,553503,556578,570643,399646,562062,445486,560668,791580,406658,393940	lamc1,tpm2,ryr1a,ctgfa,myoc,sdprb,col1a1a,lats2,icn,hsc70,igfbp7,fbln2,ampd3a,vwf,fhl1a,socs2,ak1,phldb2b,hspb8,cnn2,atp2a2a	0.00673272
msigdb	LANDIS_ERBB2_BREAST_TUMORS_324_DN	LANDIS_ERBB2_BREAST_TUMORS_324_DN	5.706e-05	-9.77141	72	10	0.0632911	158	5159	570643,559276,368419,30363,791580,100334431,503514,447845,406325,337158	vwf,ahnak,ccdc80,fzd4,hspb8,col5a1,angptl2b,sdprb,acaa2,col1a1a	0.00677427
msigdb	GO_REGULATION_OF_MUSCLE_SYSTEM_PROCESS	GO_REGULATION_OF_MUSCLE_SYSTEM_PROCESS	5.706e-05	-9.77141	72	10	0.0632911	158	5159	798565,100004946,321449,494489,415209,777750,58082,393940,100003572,568288	ryr1a,trpm4a,ctgfa,atp2a1l,tpm2,ece1,tnnc2,atp2a2a,tnnt3b,plce1	0.00677427
msigdb	MODULE_512	MODULE_512	5.92378e-05	-9.73395	15	5	0.0316456	158	5159	58143,399646,334269,336425,100003572	mylz3,fhl1a,myom2a,aldoaa,tnnt3b	0.00694089
msigdb	CLASPER_LYMPHATIC_VESSELS_DURING_METASTASIS_DN	CLASPER_LYMPHATIC_VESSELS_DURING_METASTASIS_DN	5.92378e-05	-9.73395	15	5	0.0316456	158	5159	567771,100001725,564821,100334431,336471	col6a2,emilin2a,col5a2a,col5a1,col1a2	0.00694089
msigdb	GO_CELL_ADHESION_MOLECULE_BINDING	GO_CELL_ADHESION_MOLECULE_BINDING	6.4398e-05	-9.65043	73	10	0.0632911	158	5159	403009,445506,100334431,337767,114424,641575,570643,60635,321449,406454	ezra,emp2,col5a1,lamb2,cdh1,actn2b,vwf,cldn7b,ctgfa,epcam	0.00744815
msigdb	V$AP1_Q6_01	V$AP1_Q6_01	6.4398e-05	-9.65043	73	10	0.0632911	158	5159	431732,100149390,393828,286832,565429,317743,793897,553407,450019,336425	smpx,lmod3,myoz2b,lamc1,hspg2,gapdh,psme4a,sec24d,hspb7,aldoaa	0.00744815
msigdb	GO_MUSCLE_CELL_DIFFERENTIATION	GO_MUSCLE_CELL_DIFFERENTIATION	6.55089e-05	-9.63333	88	11	0.0696203	158	5159	30441,393165,415209,100149390,404627,403001,393940,556258,572412,641575,100149766	tmod4,pdlim5b,tpm2,lmod3,six1b,cfl2,atp2a2a,tcap,obscnb,actn2b,tmod1	0.00752806
msigdb	GO_ANCHORING_JUNCTION	GO_ANCHORING_JUNCTION	6.70616e-05	-9.6099	192	17	0.107595	158	5159	334724,559276,337010,565429,406658,30084,403009,568593,560668,560297,399646,449936,550568,431732,393586,114424,641575	anxa1a,ahnak,rpl7a,hspg2,cnn2,nme2b.2,ezra,sdc4,phldb2b,pgm5,fhl1a,ppl,pdlim1,smpx,hsc70,cdh1,actn2b	0.00762799
msigdb	LEI_MYB_TARGETS	LEI_MYB_TARGETS	6.7655e-05	-9.60109	104	12	0.0759494	158	5159	336471,415209,406454,449936,60635,246095,334724,406844,114424,405860,445051,445506	col1a2,tpm2,epcam,ppl,cldn7b,gpib,anxa1a,krt15,cdh1,igfbp7,krt91,emp2	0.00762799
msigdb	TGANNYRGCA_V$TCF11MAFG_01	TGANNYRGCA_V$TCF11MAFG_01	6.7655e-05	-9.60109	104	12	0.0759494	158	5159	559276,317743,553503,431732,403001,321664,794178,100533983,548602,447845,553407,373076	ahnak,gapdh,fbln2,smpx,cfl2,aldob,hdlbpa,eml3,myoc,sdprb,sec24d,tpm3	0.00762799
msigdb	KEGG_HYPERTROPHIC_CARDIOMYOPATHY_HCM	KEGG_HYPERTROPHIC_CARDIOMYOPATHY_HCM	7.22379e-05	-9.53555	35	7	0.0443038	158	5159	393940,405791,798565,394012,373076,369195,415209	atp2a2a,cacna1sb,ryr1a,itga9,tpm3,tgfb3,tpm2	0.00807543
msigdb	GSE43955_10H_VS_60H_ACT_CD4_TCELL_DN	GSE43955_10H_VS_60H_ACT_CD4_TCELL_DN	7.25244e-05	-9.53159	74	10	0.0632911	158	5159	337767,553665,100037369,561082,564821,445506,336471,777750,553503,559276	lamb2,cnot6l,atpif1a,ptrfb,col5a2a,emp2,col1a2,ece1,fbln2,ahnak	0.00807543
msigdb	DELACROIX_RARG_BOUND_MEF	DELACROIX_RARG_BOUND_MEF	7.75512e-05	-9.46457	122	13	0.0822785	158	5159	327067,449936,321449,334724,553503,286832,369195,323696,403001,550442,337298,336655,337158	slc25a4,ppl,ctgfa,anxa1a,fbln2,lamc1,tgfb3,f11r.1,cfl2,coq10b,sulf1,icn,col1a1a	0.00858186
msigdb	GO_SARCOPLASM	GO_SARCOPLASM	8.19881e-05	-9.40894	25	6	0.0379747	158	5159	561350,393874,393940,798565,553333,494489	ryr3,tmem38a,atp2a2a,ryr1a,jph2,atp2a1l	0.00901719
msigdb	TAAWWATAG_V$RSRFC4_Q2	TAAWWATAG_V$RSRFC4_Q2	8.35862e-05	-9.38963	61	9	0.056962	158	5159	336425,565849,337158,393874,550568,58082,431732,321035,58143	aldoaa,ppp2r3a,col1a1a,tmem38a,pdlim1,tnnc2,smpx,pabpc4,mylz3	0.00907634
msigdb	GO_STRIATED_MUSCLE_CELL_DIFFERENTIATION	GO_STRIATED_MUSCLE_CELL_DIFFERENTIATION	8.35862e-05	-9.38963	61	9	0.056962	158	5159	30441,393165,415209,100149390,403001,572412,556258,100149766,641575	tmod4,pdlim5b,tpm2,lmod3,cfl2,obscnb,tcap,tmod1,actn2b	0.00907634
msigdb	GO_POSITIVE_REGULATION_OF_HEART_CONTRACTION	GO_POSITIVE_REGULATION_OF_HEART_CONTRACTION	8.40449e-05	-9.38416	16	5	0.0316456	158	5159	100004946,393940,321449,798565,415209	trpm4a,atp2a2a,ctgfa,ryr1a,tpm2	0.00907634
msigdb	GO_EXTRACELLULAR_MATRIX_STRUCTURAL_CONSTITUENT	GO_EXTRACELLULAR_MATRIX_STRUCTURAL_CONSTITUENT	8.73928e-05	-9.3451	36	7	0.0443038	158	5159	337158,553503,286832,336471,100334431,564821,100001725	col1a1a,fbln2,lamc1,col1a2,col5a1,col5a2a,emilin2a	0.00927036
msigdb	GO_PLATELET_DEGRANULATION	GO_PLATELET_DEGRANULATION	8.73928e-05	-9.3451	36	7	0.0443038	158	5159	336425,553553,570643,393730,30255,641575,369195	aldoaa,cfd,vwf,scg3,tfa,actn2b,tgfb3	0.00927036
msigdb	GO_MYELOID_CELL_HOMEOSTASIS	GO_MYELOID_CELL_HOMEOSTASIS	8.73928e-05	-9.3451	36	7	0.0443038	158	5159	556578,393558,260441,334724,100332594,246095,100037369	ampd3a,mb,mthfd1b,anxa1a,tgfbr3,gpib,atpif1a	0.00927036
msigdb	GO_PROTEIN_TRIMERIZATION	GO_PROTEIN_TRIMERIZATION	9.46656e-05	-9.26516	9	4	0.0253165	158	5159	567771,564500,337158,336471	col6a2,scara5,col1a1a,col1a2	0.00980966
msigdb	GO_COSTAMERE	GO_COSTAMERE	9.46656e-05	-9.26516	9	4	0.0253165	158	5159	431732,568593,560297,559276	smpx,sdc4,pgm5,ahnak	0.00980966
msigdb	GO_MYOSIN_FILAMENT	GO_MYOSIN_FILAMENT	9.46656e-05	-9.26516	9	4	0.0253165	158	5159	492356,751793,334269,100002040	mybpc1,mybpc2a,myom2a,myhb	0.00980966
msigdb	LIANG_SILENCED_BY_METHYLATION_UP	LIANG_SILENCED_BY_METHYLATION_UP	9.46656e-05	-9.26516	9	4	0.0253165	158	5159	321046,751785,406844,445051	c3a.1,aldh1a3,krt15,krt91	0.00980966
msigdb	V$RSRFC4_Q2	V$RSRFC4_Q2	0.000102331	-9.1873	77	10	0.0632911	158	5159	30095,393867,550568,100535241,58143,100002040,369195,431732,393828,58082	ckma,ampd1,pdlim1,thbs2a,mylz3,myhb,tgfb3,smpx,myoz2b,tnnc2	0.010538
msigdb	GO_PYRUVATE_METABOLIC_PROCESS	GO_PYRUVATE_METABOLIC_PROCESS	0.00010391	-9.17198	26	6	0.0379747	158	5159	572733,336425,246095,317743,447836,321664	pgam2,aldoaa,gpib,gapdh,pfkma,aldob	0.010538
msigdb	REACTOME_GLUCOSE_METABOLISM	REACTOME_GLUCOSE_METABOLISM	0.00010391	-9.17198	26	6	0.0379747	158	5159	572733,317743,321664,447836,246095,336425	pgam2,gapdh,aldob,pfkma,gpib,aldoaa	0.010538
msigdb	HELLER_HDAC_TARGETS_SILENCED_BY_METHYLATION_UP	HELLER_HDAC_TARGETS_SILENCED_BY_METHYLATION_UP	0.000104046	-9.17068	143	14	0.0886076	158	5159	567771,449936,553527,751785,114426,393165,415209,559066,114424,100149766,568593,336655,321046,399646	col6a2,ppl,mlf1,aldh1a3,odc1,pdlim5b,tpm2,myofl,cdh1,tmod1,sdc4,icn,c3a.1,fhl1a	0.010538
msigdb	BIOCARTA_GLYCOLYSIS_PATHWAY	BIOCARTA_GLYCOLYSIS_PATHWAY	0.000110254	-9.11273	4	3	0.0189873	158	5159	321664,317743,246095	aldob,gapdh,gpib	0.0109807
msigdb	GO_PROTEIN_HETEROTRIMERIZATION	GO_PROTEIN_HETEROTRIMERIZATION	0.000110254	-9.11273	4	3	0.0189873	158	5159	336471,337158,567771	col1a2,col1a1a,col6a2	0.0109807
msigdb	REACTOME_PLATELET_ADHESION_TO_EXPOSED_COLLAGEN	REACTOME_PLATELET_ADHESION_TO_EXPOSED_COLLAGEN	0.000110254	-9.11273	4	3	0.0189873	158	5159	570643,336471,337158	vwf,col1a2,col1a1a	0.0109807
msigdb	MODULE_342	MODULE_342	0.000114329	-9.07643	78	10	0.0632911	158	5159	791580,323696,445051,561082,406844,114424,449936,60635,402957,406454	hspb8,f11r.1,krt91,ptrfb,krt15,cdh1,ppl,cldn7b,cnksr1,epcam	0.0112614
msigdb	GSE22935_WT_VS_MYD88_KO_MACROPHAGE_48H_MBOVIS_BCG_STIM_UP	GSE22935_WT_VS_MYD88_KO_MACROPHAGE_48H_MBOVIS_BCG_STIM_UP	0.000114329	-9.07643	78	10	0.0632911	158	5159	404627,445175,553333,334269,30255,337767,560297,450019,393367,751785	six1b,acsl1b,jph2,myom2a,tfa,lamb2,pgm5,hspb7,coro6,aldh1a3	0.0112614
msigdb	GO_PLATELET_ALPHA_GRANULE	GO_PLATELET_ALPHA_GRANULE	0.000130248	-8.94607	27	6	0.0379747	158	5159	369195,100535241,641575,570643,553553,336425	tgfb3,thbs2a,actn2b,vwf,cfd,aldoaa	0.0126214
msigdb	SASAI_RESISTANCE_TO_NEOPLASTIC_TRANSFROMATION	SASAI_RESISTANCE_TO_NEOPLASTIC_TRANSFROMATION	0.000130248	-8.94607	27	6	0.0379747	158	5159	553503,337767,369195,337158,564821,321449	fbln2,lamb2,tgfb3,col1a1a,col5a2a,ctgfa	0.0126214
msigdb	GO_REGULATION_OF_STRIATED_MUSCLE_CONTRACTION	GO_REGULATION_OF_STRIATED_MUSCLE_CONTRACTION	0.000130248	-8.94607	27	6	0.0379747	158	5159	798565,100003572,321449,100004946,393940,494489	ryr1a,tnnt3b,ctgfa,trpm4a,atp2a2a,atp2a1l	0.0126214
msigdb	MODULE_324	MODULE_324	0.000154972	-8.77227	52	8	0.0506329	158	5159	30255,114424,336655,58082,553503,100535241,334724,561350	tfa,cdh1,icn,tnnc2,fbln2,thbs2a,anxa1a,ryr3	0.014878
msigdb	CHIARADONNA_NEOPLASTIC_TRANSFORMATION_KRAS_DN	CHIARADONNA_NEOPLASTIC_TRANSFORMATION_KRAS_DN	0.000156505	-8.76242	66	9	0.056962	158	5159	336471,368419,321449,337158,399646,337767,564821,100334431,445506	col1a2,ccdc80,ctgfa,col1a1a,fhl1a,lamb2,col5a2a,col5a1,emp2	0.014878
msigdb	GO_SKIN_DEVELOPMENT	GO_SKIN_DEVELOPMENT	0.000156505	-8.76242	66	9	0.056962	158	5159	336471,449936,334724,406844,337158,567674,445051,100334431,564821	col1a2,ppl,anxa1a,krt15,col1a1a,lats2,krt91,col5a1,col5a2a	0.014878
msigdb	SATO_SILENCED_EPIGENETICALLY_IN_PANCREATIC_CANCER	SATO_SILENCED_EPIGENETICALLY_IN_PANCREATIC_CANCER	0.000156855	-8.76019	18	5	0.0316456	158	5159	406844,60635,445051,323696,403009	krt15,cldn7b,krt91,f11r.1,ezra	0.014878
msigdb	POMEROY_MEDULLOBLASTOMA_DESMOPLASIC_VS_CLASSIC_DN	POMEROY_MEDULLOBLASTOMA_DESMOPLASIC_VS_CLASSIC_DN	0.000161614	-8.7303	28	6	0.0379747	158	5159	286832,751785,335370,336471,337158,30723	lamc1,aldh1a3,eef1b2,col1a2,col1a1a,tpt1	0.0152487
msigdb	GO_REGULATION_OF_SYSTEM_PROCESS	GO_REGULATION_OF_SYSTEM_PROCESS	0.000166388	-8.70119	187	16	0.101266	158	5159	405791,415209,777750,798565,796753,321449,100004946,450019,568288,100003572,393940,445506,353221,494489,58082,561350	cacna1sb,tpm2,ece1,ryr1a,si:ch211-247n2.1,ctgfa,trpm4a,hspb7,plce1,tnnt3b,atp2a2a,emp2,pomca,atp2a1l,tnnc2,ryr3	0.015617
msigdb	KEGG_DILATED_CARDIOMYOPATHY	KEGG_DILATED_CARDIOMYOPATHY	0.000176075	-8.6446	40	7	0.0443038	158	5159	405791,798565,394012,393940,369195,415209,373076	cacna1sb,ryr1a,itga9,atp2a2a,tgfb3,tpm2,tpm3	0.0163549
msigdb	WANG_ESOPHAGUS_CANCER_VS_NORMAL_UP	WANG_ESOPHAGUS_CANCER_VS_NORMAL_UP	0.000176075	-8.6446	40	7	0.0443038	158	5159	406325,114426,777750,568593,30084,405860,564821	acaa2,odc1,ece1,sdc4,nme2b.2,igfbp7,col5a2a	0.0163549
msigdb	ISSAEVA_MLL2_TARGETS	ISSAEVA_MLL2_TARGETS	0.000198668	-8.52387	29	6	0.0379747	158	5159	449936,445051,559276,100334431,399646,406844	ppl,krt91,ahnak,col5a1,fhl1a,krt15	0.0183584
msigdb	GO_ACTIN_FILAMENT_ORGANIZATION	GO_ACTIN_FILAMENT_ORGANIZATION	0.000203411	-8.50028	54	8	0.0506329	158	5159	30441,100149390,403001,403009,556258,336425,445506,100149766	tmod4,lmod3,cfl2,ezra,tcap,aldoaa,emp2,tmod1	0.0187003
msigdb	CROONQUIST_NRAS_VS_STROMAL_STIMULATION_DN	CROONQUIST_NRAS_VS_STROMAL_STIMULATION_DN	0.000206932	-8.48312	41	7	0.0443038	158	5159	100535241,336471,415209,337298,321449,327067,405860	thbs2a,col1a2,tpm2,sulf1,ctgfa,slc25a4,igfbp7	0.0187061
msigdb	GNF2_HPX	GNF2_HPX	0.000207649	-8.47966	19	5	0.0316456	158	5159	796865,321664,436921,321046,393611	gamt,aldob,slc38a5b,c3a.1,c6	0.0187061
msigdb	GNF2_HPN	GNF2_HPN	0.000207649	-8.47966	19	5	0.0316456	158	5159	321046,393611,796865,436921,321664	c3a.1,c6,gamt,slc38a5b,aldob	0.0187061
msigdb	GO_REGULATION_OF_ACTIN_FILAMENT_DEPOLYMERIZATION	GO_REGULATION_OF_ACTIN_FILAMENT_DEPOLYMERIZATION	0.000207649	-8.47966	19	5	0.0316456	158	5159	100149766,641575,100149390,30441,403001	tmod1,actn2b,lmod3,tmod4,cfl2	0.0187061
msigdb	VECCHI_GASTRIC_CANCER_EARLY_DN	VECCHI_GASTRIC_CANCER_EARLY_DN	0.000212573	-8.45623	117	12	0.0759494	158	5159	568032,796753,100334492,564500,565849,791580,403001,393867,447845,548602,399646,393611	rbp2a,si:ch211-247n2.1,entpd5b,scara5,ppp2r3a,hspb8,cfl2,ampd1,sdprb,myoc,fhl1a,c6	0.0190539
msigdb	YTATTTTNR_V$MEF2_02	YTATTTTNR_V$MEF2_02	0.00021603	-8.44009	252	19	0.120253	158	5159	393874,321449,58143,393165,393730,553527,431732,565849,30095,337767,30441,336471,369195,58082,393828,572412,572733,393558,553333	tmem38a,ctgfa,mylz3,pdlim5b,scg3,mlf1,smpx,ppp2r3a,ckma,lamb2,tmod4,col1a2,tgfb3,tnnc2,myoz2b,obscnb,pgam2,mb,jph2	0.0192675
msigdb	MCBRYAN_PUBERTAL_BREAST_4_5WK_UP	MCBRYAN_PUBERTAL_BREAST_4_5WK_UP	0.000230747	-8.37419	101	11	0.0696203	158	5159	60635,570643,369195,406454,100535241,566851,393586,403009,100037369,114424,568593	cldn7b,vwf,tgfb3,epcam,thbs2a,tmem2,hsc70,ezra,atpif1a,cdh1,sdc4	0.0204782
msigdb	SUNG_METASTASIS_STROMA_UP	SUNG_METASTASIS_STROMA_UP	0.000231929	-8.36908	55	8	0.0506329	158	5159	553407,399646,568593,100334431,564821,100535241,553503,565429	sec24d,fhl1a,sdc4,col5a1,col5a2a,thbs2a,fbln2,hspg2	0.0204818
msigdb	GO_POSITIVE_REGULATION_OF_HEART_RATE	GO_POSITIVE_REGULATION_OF_HEART_RATE	0.00023628	-8.35049	11	4	0.0253165	158	5159	393940,100004946,798565,415209	atp2a2a,trpm4a,ryr1a,tpm2	0.0205795
msigdb	GO_MUSCLE_HYPERTROPHY	GO_MUSCLE_HYPERTROPHY	0.00023628	-8.35049	11	4	0.0253165	158	5159	798565,556258,393165,548602	ryr1a,tcap,pdlim5b,myoc	0.0205795
msigdb	V$RSRFC4_01	V$RSRFC4_01	0.00023648	-8.34964	85	10	0.0632911	158	5159	58082,393828,431732,100535241,550568,393867,336655,30095,403001,565849	tnnc2,myoz2b,smpx,thbs2a,pdlim1,ampd1,icn,ckma,cfl2,ppp2r3a	0.0205795
msigdb	GO_MOVEMENT_OF_CELL_OR_SUBCELLULAR_COMPONENT	GO_MOVEMENT_OF_CELL_OR_SUBCELLULAR_COMPONENT	0.000240472	-8.33291	456	28	0.177215	158	5159	334724,336471,58082,751793,492356,403009,404627,445506,100334431,556258,100003572,100149766,568593,394012,798565,100332594,100004946,321449,286832,100002040,58143,415209,323696,556641,337767,337158,373076,641575	anxa1a,col1a2,tnnc2,mybpc2a,mybpc1,ezra,six1b,emp2,col5a1,tcap,tnnt3b,tmod1,sdc4,itga9,ryr1a,tgfbr3,trpm4a,ctgfa,lamc1,myhb,mylz3,tpm2,f11r.1,pld1a,lamb2,col1a1a,tpm3,actn2b	0.0206686
msigdb	GO_CARBOHYDRATE_CATABOLIC_PROCESS	GO_CARBOHYDRATE_CATABOLIC_PROCESS	0.000242011	-8.32653	42	7	0.0443038	158	5159	246095,336425,317743,321664,447836,572733,560297	gpib,aldoaa,gapdh,aldob,pfkma,pgam2,pgm5	0.0206686
msigdb	CCAWWNAAGG_V$SRF_Q4	CCAWWNAAGG_V$SRF_Q4	0.000242115	-8.3261	30	6	0.0379747	158	5159	30095,403001,393347,447845,100536479,393165	ckma,cfl2,fgfrl1a,sdprb,podn,pdlim5b	0.0206686
msigdb	REACTOME_NCAM_SIGNALING_FOR_NEURITE_OUT_GROWTH	REACTOME_NCAM_SIGNALING_FOR_NEURITE_OUT_GROWTH	0.000242115	-8.3261	30	6	0.0379747	158	5159	567771,100334431,564821,405791,337158,336471	col6a2,col5a1,col5a2a,cacna1sb,col1a1a,col1a2	0.0206686
msigdb	GSE26488_WT_VS_HDAC7_DELTAP_TG_OT2_THYMOCYTE_WITH_PEPTIDE_INJECTION_DN	GSE26488_WT_VS_HDAC7_DELTAP_TG_OT2_THYMOCYTE_WITH_PEPTIDE_INJECTION_DN	0.00026065	-8.25233	86	10	0.0632911	158	5159	553503,777750,369195,556578,559276,567771,321449,406325,567674,568593	fbln2,ece1,tgfb3,ampd3a,ahnak,col6a2,ctgfa,acaa2,lats2,sdc4	0.0221454
msigdb	GO_AMP_METABOLIC_PROCESS	GO_AMP_METABOLIC_PROCESS	0.000269428	-8.21921	5	3	0.0189873	158	5159	556578,445486,407989	ampd3a,ak1,adssl1	0.0222105
msigdb	MODULE_272	MODULE_272	0.000269428	-8.21921	5	3	0.0189873	158	5159	260441,114426,336425	mthfd1b,odc1,aldoaa	0.0222105
msigdb	OXFORD_RALB_TARGETS_UP	OXFORD_RALB_TARGETS_UP	0.000269428	-8.21921	5	3	0.0189873	158	5159	565429,415209,100334431	hspg2,tpm2,col5a1	0.0222105
msigdb	BIOCARTA_MTA3_PATHWAY	BIOCARTA_MTA3_PATHWAY	0.000269428	-8.21921	5	3	0.0189873	158	5159	317743,336425,114424	gapdh,aldoaa,cdh1	0.0222105
msigdb	PID_INTEGRIN3_PATHWAY	PID_INTEGRIN3_PATHWAY	0.000270072	-8.21682	20	5	0.0316456	158	5159	323696,336471,286832,568593,337158	f11r.1,col1a2,lamc1,sdc4,col1a1a	0.0222105
msigdb	GO_PLATELET_ALPHA_GRANULE_LUMEN	GO_PLATELET_ALPHA_GRANULE_LUMEN	0.000270072	-8.21682	20	5	0.0316456	158	5159	570643,553553,336425,369195,641575	vwf,cfd,aldoaa,tgfb3,actn2b	0.0222105
msigdb	MODULE_220	MODULE_220	0.000270089	-8.21676	120	12	0.0759494	158	5159	321449,100332594,751793,404627,445051,492356,100003572,445506,406844,399646,336655,337158	ctgfa,tgfbr3,mybpc2a,six1b,krt91,mybpc1,tnnt3b,emp2,krt15,fhl1a,icn,col1a1a	0.0222105
msigdb	WINTER_HYPOXIA_METAGENE	WINTER_HYPOXIA_METAGENE	0.000274671	-8.19994	103	11	0.0696203	158	5159	30255,564821,100334431,336425,369195,114426,751785,100535241,334724,246095,317743	tfa,col5a2a,col5a1,aldoaa,tgfb3,odc1,aldh1a3,thbs2a,anxa1a,gpib,gapdh	0.0224841
msigdb	WU_CELL_MIGRATION	WU_CELL_MIGRATION	0.000276271	-8.19413	71	9	0.056962	158	5159	449936,60635,567771,406454,445051,405860,406844,336655,114424	ppl,cldn7b,col6a2,epcam,krt91,igfbp7,krt15,icn,cdh1	0.0225123
msigdb	SANA_TNF_SIGNALING_DN	SANA_TNF_SIGNALING_DN	0.00028173	-8.17456	43	7	0.0443038	158	5159	321449,334724,570643,559066,30723,447845,572733	ctgfa,anxa1a,vwf,myofl,tpt1,sdprb,pgam2	0.0228533
msigdb	REN_ALVEOLAR_RHABDOMYOSARCOMA_UP	REN_ALVEOLAR_RHABDOMYOSARCOMA_UP	0.000292707	-8.13634	31	6	0.0379747	158	5159	100001241,494489,100149766,404627,570643,100003572	synpo2lb,atp2a1l,tmod1,six1b,vwf,tnnt3b	0.0235307
msigdb	GO_MYOSIN_COMPLEX	GO_MYOSIN_COMPLEX	0.000292707	-8.13634	31	6	0.0379747	158	5159	492356,562279,58143,100002040,334269,751793	mybpc1,myo19,mylz3,myhb,myom2a,mybpc2a	0.0235307
msigdb	LIM_MAMMARY_STEM_CELL_UP	LIM_MAMMARY_STEM_CELL_UP	0.000303772	-8.09923	197	16	0.101266	158	5159	327067,565429,393940,100334431,337298,100536479,399646,394012,321449,100332594,393347,286832,564821,553407,447845,503514	slc25a4,hspg2,atp2a2a,col5a1,sulf1,podn,fhl1a,itga9,ctgfa,tgfbr3,fgfrl1a,lamc1,col5a2a,sec24d,sdprb,angptl2b	0.0243113
msigdb	GO_PLASMA_MEMBRANE_RAFT	GO_PLASMA_MEMBRANE_RAFT	0.000326527	-8.027	44	7	0.0443038	158	5159	561082,445506,403009,559066,337401,114424,447845	ptrfb,emp2,ezra,myofl,ehd2b,cdh1,sdprb	0.0259011
msigdb	V$MEF2_01	V$MEF2_01	0.000326527	-8.027	44	7	0.0443038	158	5159	553333,393828,431732,553527,100001241,58143,30095	jph2,myoz2b,smpx,mlf1,synpo2lb,mylz3,ckma	0.0259011
msigdb	NABA_COLLAGENS	NABA_COLLAGENS	0.000345778	-7.96971	21	5	0.0316456	158	5159	564821,100334431,567771,337158,336471	col5a2a,col5a1,col6a2,col1a1a,col1a2	0.0266214
msigdb	KEGG_PENTOSE_PHOSPHATE_PATHWAY	KEGG_PENTOSE_PHOSPHATE_PATHWAY	0.000346002	-7.96907	12	4	0.0253165	158	5159	321664,447836,246095,336425	aldob,pfkma,gpib,aldoaa	0.0266214
msigdb	MODULE_153	MODULE_153	0.000346002	-7.96907	12	4	0.0253165	158	5159	321449,445051,337158,406844	ctgfa,krt91,col1a1a,krt15	0.0266214
msigdb	SCHLINGEMANN_SKIN_CARCINOGENESIS_TPA_DN	SCHLINGEMANN_SKIN_CARCINOGENESIS_TPA_DN	0.000346002	-7.96907	12	4	0.0253165	158	5159	556258,337158,58143,336471	tcap,col1a1a,mylz3,col1a2	0.0266214
msigdb	WEINMANN_ADAPTATION_TO_HYPOXIA_DN	WEINMANN_ADAPTATION_TO_HYPOXIA_DN	0.000346002	-7.96907	12	4	0.0253165	158	5159	405860,393586,415209,568593	igfbp7,hsc70,tpm2,sdc4	0.0266214
msigdb	FARMER_BREAST_CANCER_CLUSTER_4	FARMER_BREAST_CANCER_CLUSTER_4	0.000346002	-7.96907	12	4	0.0253165	158	5159	336471,100535241,100334431,564821	col1a2,thbs2a,col5a1,col5a2a	0.0266214
msigdb	BOQUEST_STEM_CELL_CULTURED_VS_FRESH_DN	BOQUEST_STEM_CELL_CULTURED_VS_FRESH_DN	0.000346002	-7.96907	12	4	0.0253165	158	5159	548602,321046,449936,553553	myoc,c3a.1,ppl,cfd	0.0266214
msigdb	TURASHVILI_BREAST_DUCTAL_CARCINOMA_VS_DUCTAL_NORMAL_DN	TURASHVILI_BREAST_DUCTAL_CARCINOMA_VS_DUCTAL_NORMAL_DN	0.000380725	-7.87343	59	8	0.0506329	158	5159	492356,445051,406844,30255,793897,553553,334724,751785	mybpc1,krt91,krt15,tfa,psme4a,cfd,anxa1a,aldh1a3	0.0291678
msigdb	REACTOME_HEMOSTASIS	REACTOME_HEMOSTASIS	0.000389929	-7.84955	162	14	0.0886076	158	5159	30255,337401,641575,337158,336425,393940,323696,393730,336471,494489,369195,553553,570643,796753	tfa,ehd2b,actn2b,col1a1a,aldoaa,atp2a2a,f11r.1,scg3,col1a2,atp2a1l,tgfb3,cfd,vwf,si:ch211-247n2.1	0.0297457
msigdb	PASINI_SUZ12_TARGETS_DN	PASINI_SUZ12_TARGETS_DN	0.0004144	-7.78868	144	13	0.0822785	158	5159	334724,559276,336471,393165,415209,406658,561082,100334431,337298,403001,337158,560668,100001241	anxa1a,ahnak,col1a2,pdlim5b,tpm2,cnn2,ptrfb,col5a1,sulf1,cfl2,col1a1a,phldb2b,synpo2lb	0.0314786
msigdb	GO_SECRETORY_GRANULE	GO_SECRETORY_GRANULE	0.000416352	-7.78398	108	11	0.0696203	158	5159	570643,553553,100535241,777750,369195,393730,336425,353221,30255,641575,337158	vwf,cfd,thbs2a,ece1,tgfb3,scg3,aldoaa,pomca,tfa,actn2b,col1a1a	0.0314935
msigdb	GO_TISSUE_DEVELOPMENT	GO_TISSUE_DEVELOPMENT	0.00042149	-7.77171	545	31	0.196203	158	5159	568032,334724,260441,751785,406454,556258,393940,337298,100334431,403009,404627,100149766,568593,321449,246095,100332594,798565,449936,415209,393165,286832,252849,565849,323696,445051,567674,336655,337158,641575,406844,337767	rbp2a,anxa1a,mthfd1b,aldh1a3,epcam,tcap,atp2a2a,sulf1,col5a1,ezra,six1b,tmod1,sdc4,ctgfa,gpib,tgfbr3,ryr1a,ppl,tpm2,pdlim5b,lamc1,thbs3a,ppp2r3a,f11r.1,krt91,lats2,icn,col1a1a,actn2b,krt15,lamb2	0.0317481
msigdb	GSE13306_TREG_VS_TCONV_SPLEEN_UP	GSE13306_TREG_VS_TCONV_SPLEEN_UP	0.000428045	-7.75628	60	8	0.0506329	158	5159	548602,568593,553665,562062,337158,114426,286832,553527	myoc,sdc4,cnot6l,socs2,col1a1a,odc1,lamc1,mlf1	0.032107
msigdb	GO_KERATINOCYTE_DIFFERENTIATION	GO_KERATINOCYTE_DIFFERENTIATION	0.000436513	-7.73669	22	5	0.0316456	158	5159	445051,449936,334724,406844,567674	krt91,ppl,anxa1a,krt15,lats2	0.0324704
msigdb	HOSHIDA_LIVER_CANCER_LATE_RECURRENCE_UP	HOSHIDA_LIVER_CANCER_LATE_RECURRENCE_UP	0.000436513	-7.73669	22	5	0.0316456	158	5159	393586,556641,334724,60635,114424	hsc70,pld1a,anxa1a,cldn7b,cdh1	0.0324704
msigdb	ROME_INSULIN_TARGETS_IN_MUSCLE_UP	ROME_INSULIN_TARGETS_IN_MUSCLE_UP	0.000443299	-7.72127	145	13	0.0822785	158	5159	407989,321035,100149390,337010,415209,114426,336425,100533983,565849,791580,403001,406325,100001241	adssl1,pabpc4,lmod3,rpl7a,tpm2,odc1,aldoaa,eml3,ppp2r3a,hspb8,cfl2,acaa2,synpo2lb	0.0327038
msigdb	GO_CELL_CELL_JUNCTION	GO_CELL_CELL_JUNCTION	0.000443299	-7.72127	145	13	0.0822785	158	5159	60635,569088,559276,449936,30363,393347,402957,406454,406658,393940,323696,114424,560297	cldn7b,pdzd2,ahnak,ppl,fzd4,fgfrl1a,cnksr1,epcam,cnn2,atp2a2a,f11r.1,cdh1,pgm5	0.0327038
msigdb	GO_NUCLEOBASE_CONTAINING_SMALL_MOLECULE_METABOLIC_PROCESS	GO_NUCLEOBASE_CONTAINING_SMALL_MOLECULE_METABOLIC_PROCESS	0.00045068	-7.70475	204	16	0.101266	158	5159	100002040,246095,407989,447836,317743,100334492,336425,393586,796865,556578,260441,445486,393867,572733,321664,30084	myhb,gpib,adssl1,pfkma,gapdh,entpd5b,aldoaa,hsc70,gamt,ampd3a,mthfd1b,ak1,ampd1,pgam2,aldob,nme2b.2	0.0331121
msigdb	GO_DIVALENT_INORGANIC_CATION_TRANSPORT	GO_DIVALENT_INORGANIC_CATION_TRANSPORT	0.000453336	-7.69888	92	10	0.0632911	158	5159	553333,30255,393940,405791,30723,494489,100004946,321449,561350,798565	jph2,tfa,atp2a2a,cacna1sb,tpt1,atp2a1l,trpm4a,ctgfa,ryr3,ryr1a	0.0331712
msigdb	GSE9509_LPS_VS_LPS_AND_IL10_STIM_IL10_KO_MACROPHAGE_20MIN_UP	GSE9509_LPS_VS_LPS_AND_IL10_STIM_IL10_KO_MACROPHAGE_20MIN_UP	0.000463734	-7.6762	76	9	0.056962	158	5159	321449,569088,571812,402957,100334431,561082,337401,562062,321046	ctgfa,pdzd2,pear1,cnksr1,col5a1,ptrfb,ehd2b,socs2,c3a.1	0.0337942
msigdb	GO_GROWTH_FACTOR_BINDING	GO_GROWTH_FACTOR_BINDING	0.000480039	-7.64164	61	8	0.0506329	158	5159	100332594,321449,369195,393347,336471,100334431,405860,337158	tgfbr3,ctgfa,tgfb3,fgfrl1a,col1a2,col5a1,igfbp7,col1a1a	0.0347003
msigdb	GO_CELL_SUBSTRATE_ADHESION	GO_CELL_SUBSTRATE_ADHESION	0.000480039	-7.64164	61	8	0.0506329	158	5159	570643,321449,393347,286832,30363,252849,445506,641575	vwf,ctgfa,fgfrl1a,lamc1,fzd4,thbs3a,emp2,actn2b	0.0347003
msigdb	GO_SKELETAL_MUSCLE_CONTRACTION	GO_SKELETAL_MUSCLE_CONTRACTION	0.00048792	-7.62536	13	4	0.0253165	158	5159	393558,58082,556258,100003572	mb,tnnc2,tcap,tnnt3b	0.0348484
msigdb	BRACHAT_RESPONSE_TO_METHOTREXATE_DN	BRACHAT_RESPONSE_TO_METHOTREXATE_DN	0.00048792	-7.62536	13	4	0.0253165	158	5159	317743,336425,246095,100001725	gapdh,aldoaa,gpib,emilin2a	0.0348484
msigdb	LIANG_SILENCED_BY_METHYLATION_2	LIANG_SILENCED_BY_METHYLATION_2	0.00048792	-7.62536	13	4	0.0253165	158	5159	321046,406844,336655,445051	c3a.1,krt15,icn,krt91	0.0348484
msigdb	V$AP1_Q4_01	V$AP1_Q4_01	0.000494782	-7.61139	93	10	0.0632911	158	5159	553407,436921,791580,100533983,336425,286832,100149390,393828,793897,317743	sec24d,slc38a5b,hspb8,eml3,aldoaa,lamc1,lmod3,myoz2b,psme4a,gapdh	0.0348799
msigdb	TURASHVILI_BREAST_LOBULAR_CARCINOMA_VS_DUCTAL_NORMAL_UP	TURASHVILI_BREAST_LOBULAR_CARCINOMA_VS_DUCTAL_NORMAL_UP	0.000495537	-7.60987	34	6	0.0379747	158	5159	337158,100535241,336471,337298,564821,100334431	col1a1a,thbs2a,col1a2,sulf1,col5a2a,col5a1	0.0348799
msigdb	GRADE_COLON_AND_RECTAL_CANCER_DN	GRADE_COLON_AND_RECTAL_CANCER_DN	0.000495537	-7.60987	34	6	0.0379747	158	5159	553553,100332594,404627,556641,562062,399646	cfd,tgfbr3,six1b,pld1a,socs2,fhl1a	0.0348799
msigdb	GO_GLUCOSE_METABOLIC_PROCESS	GO_GLUCOSE_METABOLIC_PROCESS	0.000496144	-7.60864	47	7	0.0443038	158	5159	572733,560297,246095,336425,317743,321664,447836	pgam2,pgm5,gpib,aldoaa,gapdh,aldob,pfkma	0.0348799
msigdb	GO_POSITIVE_REGULATION_OF_STRIATED_MUSCLE_CONTRACTION	GO_POSITIVE_REGULATION_OF_STRIATED_MUSCLE_CONTRACTION	0.000526741	-7.5488	6	3	0.0189873	158	5159	494489,321449,100004946	atp2a1l,ctgfa,trpm4a	0.0367428
msigdb	GO_KERATINIZATION	GO_KERATINIZATION	0.000526741	-7.5488	6	3	0.0189873	158	5159	406844,445051,449936	krt15,krt91,ppl	0.0367428
msigdb	GSE19374_UNINF_VS_LISTERIA_INFECTED_MACROPHAGE_UP	GSE19374_UNINF_VS_LISTERIA_INFECTED_MACROPHAGE_UP	0.000537045	-7.52943	62	8	0.0506329	158	5159	572733,790934,404627,445175,565849,260441,570956,567771	pgam2,mapkapk3,six1b,acsl1b,ppp2r3a,mthfd1b,sgk2a,col6a2	0.0373163
msigdb	GO_CYTOSOLIC_CALCIUM_ION_TRANSPORT	GO_CYTOSOLIC_CALCIUM_ION_TRANSPORT	0.000544107	-7.51636	23	5	0.0316456	158	5159	798565,561350,321449,393940,553333	ryr1a,ryr3,ctgfa,atp2a2a,jph2	0.0375162
msigdb	GO_REGULATION_OF_CARDIAC_CONDUCTION	GO_REGULATION_OF_CARDIAC_CONDUCTION	0.000544107	-7.51636	23	5	0.0316456	158	5159	100004946,393940,561350,798565,494489	trpm4a,atp2a2a,ryr3,ryr1a,atp2a1l	0.0375162
msigdb	V$HMEF2_Q6	V$HMEF2_Q6	0.000566129	-7.47669	48	7	0.0443038	158	5159	100002040,58143,100001241,431732,553333,550568,30095	myhb,mylz3,synpo2lb,smpx,jph2,pdlim1,ckma	0.0387366
msigdb	GO_HEPARIN_BINDING	GO_HEPARIN_BINDING	0.000566129	-7.47669	48	7	0.0443038	158	5159	368419,321449,100332594,100334431,252849,393347,100535241	ccdc80,ctgfa,tgfbr3,col5a1,thbs3a,fgfrl1a,thbs2a	0.0387366
msigdb	TGANTCA_V$AP1_C	TGANTCA_V$AP1_C	0.000572806	-7.46496	339	22	0.139241	158	5159	445051,561082,564821,336425,406844,553407,337158,553665,793897,317743,286832,566675,431732,436921,100533983,393940,100536479,450019,565429,562289,100149390,393828	krt91,ptrfb,col5a2a,aldoaa,krt15,sec24d,col1a1a,cnot6l,psme4a,gapdh,lamc1,suox,smpx,slc38a5b,eml3,atp2a2a,podn,hspb7,hspg2,tfeb,lmod3,myoz2b	0.0390444
msigdb	TURASHVILI_BREAST_LOBULAR_CARCINOMA_VS_LOBULAR_NORMAL_DN	TURASHVILI_BREAST_LOBULAR_CARCINOMA_VS_LOBULAR_NORMAL_DN	0.000583116	-7.44712	35	6	0.0379747	158	5159	337158,393809,100535241,336471,564821,100334431	col1a1a,cap2,thbs2a,col1a2,col5a2a,col5a1	0.0395967
msigdb	GO_EPIDERMIS_DEVELOPMENT	GO_EPIDERMIS_DEVELOPMENT	0.000599415	-7.41956	63	8	0.0506329	158	5159	406844,567674,445051,393940,449936,568032,334724,321449	krt15,lats2,krt91,atp2a2a,ppl,rbp2a,anxa1a,ctgfa	0.0402461
msigdb	GSE36888_UNTREATED_VS_IL2_TREATED_STAT5_AB_KNOCKIN_TCELL_2H_UP	GSE36888_UNTREATED_VS_IL2_TREATED_STAT5_AB_KNOCKIN_TCELL_2H_UP	0.000599415	-7.41956	63	8	0.0506329	158	5159	321046,562062,336425,393940,436585,286832,556578,317743	c3a.1,socs2,aldoaa,atp2a2a,hic1,lamc1,ampd3a,gapdh	0.0402461
msigdb	LI_AMPLIFIED_IN_LUNG_CANCER	LI_AMPLIFIED_IN_LUNG_CANCER	0.000599415	-7.41956	63	8	0.0506329	158	5159	336425,30084,337158,114424,246095,114426,100535241,336471	aldoaa,nme2b.2,col1a1a,cdh1,gpib,odc1,thbs2a,col1a2	0.0402461
msigdb	GO_CALCIUM_ION_TRANSPORT	GO_CALCIUM_ION_TRANSPORT	0.000619423	-7.38672	79	9	0.056962	158	5159	553333,405791,393940,494489,30723,798565,100004946,321449,561350	jph2,cacna1sb,atp2a2a,atp2a1l,tpt1,ryr1a,trpm4a,ctgfa,ryr3	0.0414343
msigdb	GO_PERINUCLEAR_REGION_OF_CYTOPLASM	GO_PERINUCLEAR_REGION_OF_CYTOPLASM	0.000621805	-7.38288	210	16	0.101266	158	5159	321449,317743,777750,114426,556641,252849,393586,114424,336655,337401,553407,494489,393940,403009,321664,30255	ctgfa,gapdh,ece1,odc1,pld1a,thbs3a,hsc70,cdh1,icn,ehd2b,sec24d,atp2a1l,atp2a2a,ezra,aldob,tfa	0.041439
msigdb	GO_CALCIUM_ION_TRANSMEMBRANE_TRANSPORTER_ACTIVITY	GO_CALCIUM_ION_TRANSMEMBRANE_TRANSPORTER_ACTIVITY	0.000643749	-7.3482	49	7	0.0443038	158	5159	393940,561350,100004946,798565,405791,553333,494489	atp2a2a,ryr3,trpm4a,ryr1a,cacna1sb,jph2,atp2a1l	0.0427426
msigdb	GO_CELL_JUNCTION	GO_CELL_JUNCTION	0.000650076	-7.33842	436	26	0.164557	158	5159	337010,406454,565429,402957,334724,569088,559276,560668,568593,399646,560297,406658,393940,403009,30084,30363,431732,393347,393165,60635,550568,449936,641575,114424,323696,393586	rpl7a,epcam,hspg2,cnksr1,anxa1a,pdzd2,ahnak,phldb2b,sdc4,fhl1a,pgm5,cnn2,atp2a2a,ezra,nme2b.2,fzd4,smpx,fgfrl1a,pdlim5b,cldn7b,pdlim1,ppl,actn2b,cdh1,f11r.1,hsc70	0.0430034
msigdb	GO_REGULATION_OF_BLOOD_CIRCULATION	GO_REGULATION_OF_BLOOD_CIRCULATION	0.000662909	-7.31887	114	11	0.0696203	158	5159	798565,796753,561350,321449,100004946,777750,494489,415209,405791,393940,450019	ryr1a,si:ch211-247n2.1,ryr3,ctgfa,trpm4a,ece1,atp2a1l,tpm2,cacna1sb,atp2a2a,hspb7	0.0432359
msigdb	GO_GENERATION_OF_PRECURSOR_METABOLITES_AND_ENERGY	GO_GENERATION_OF_PRECURSOR_METABOLITES_AND_ENERGY	0.000662909	-7.31887	114	11	0.0696203	158	5159	246095,327067,317743,447836,336425,353221,100037369,321664,494035,572733,560297	gpib,slc25a4,gapdh,pfkma,aldoaa,pomca,atpif1a,aldob,mtfr1,pgam2,pgm5	0.0432359
msigdb	GO_COMPLEX_OF_COLLAGEN_TRIMERS	GO_COMPLEX_OF_COLLAGEN_TRIMERS	0.000666893	-7.31288	14	4	0.0253165	158	5159	337158,336471,564821,100334431	col1a1a,col1a2,col5a2a,col5a1	0.0432359
msigdb	MUELLER_METHYLATED_IN_GLIOBLASTOMA	MUELLER_METHYLATED_IN_GLIOBLASTOMA	0.000666893	-7.31288	14	4	0.0253165	158	5159	406844,336655,323696,445051	krt15,icn,f11r.1,krt91	0.0432359
msigdb	GO_MONOSACCHARIDE_BIOSYNTHETIC_PROCESS	GO_MONOSACCHARIDE_BIOSYNTHETIC_PROCESS	0.000670474	-7.30753	24	5	0.0316456	158	5159	572733,246095,336425,317743,321664	pgam2,gpib,aldoaa,gapdh,aldob	0.0432359
msigdb	GO_REGULATION_OF_ATPASE_ACTIVITY	GO_REGULATION_OF_ATPASE_ACTIVITY	0.000670474	-7.30753	24	5	0.0316456	158	5159	415209,100037369,798565,321664,100003572	tpm2,atpif1a,ryr1a,aldob,tnnt3b	0.0432359
msigdb	MARCHINI_TRABECTEDIN_RESISTANCE_DN	MARCHINI_TRABECTEDIN_RESISTANCE_DN	0.000670474	-7.30753	24	5	0.0316456	158	5159	641575,415209,794178,246095,405860	actn2b,tpm2,hdlbpa,gpib,igfbp7	0.0432359
msigdb	GO_COLLAGEN_TRIMER	GO_COLLAGEN_TRIMER	0.000682261	-7.2901	36	6	0.0379747	158	5159	567771,100001725,100334431,564821,336471,337158	col6a2,emilin2a,col5a1,col5a2a,col1a2,col1a1a	0.0438383
msigdb	CERVERA_SDHB_TARGETS_1_UP	CERVERA_SDHB_TARGETS_1_UP	0.000729587	-7.22303	50	7	0.0443038	158	5159	337158,562062,406844,569308,445506,559066,445051	col1a1a,socs2,krt15,rbp7b,emp2,myofl,krt91	0.0467118
msigdb	GO_PROTEIN_COMPLEX_SUBUNIT_ORGANIZATION	GO_PROTEIN_COMPLEX_SUBUNIT_ORGANIZATION	0.000738638	-7.2107	513	29	0.183544	158	5159	393347,286832,793897,447836,436617,100332594,406844,553407,641575,337158,445051,336425,564500,564821,336471,100149390,559276,570643,567771,561350,30441,100149766,100037369,403009,321664,403001,556258,445506,100334431	fgfrl1a,lamc1,psme4a,pfkma,rxrgb,tgfbr3,krt15,sec24d,actn2b,col1a1a,krt91,aldoaa,scara5,col5a2a,col1a2,lmod3,ahnak,vwf,col6a2,ryr3,tmod4,tmod1,atpif1a,ezra,aldob,cfl2,tcap,emp2,col5a1	0.0470414
msigdb	GSE22443_NAIVE_VS_ACT_AND_IL2_TREATED_CD8_TCELL_UP	GSE22443_NAIVE_VS_ACT_AND_IL2_TREATED_CD8_TCELL_UP	0.000741728	-7.20653	65	8	0.0506329	158	5159	445506,564821,556641,404627,405791,553527,751785,570643	emp2,col5a2a,pld1a,six1b,cacna1sb,mlf1,aldh1a3,vwf	0.0470414
msigdb	RODWELL_AGING_KIDNEY_NO_BLOOD_UP	RODWELL_AGING_KIDNEY_NO_BLOOD_UP	0.000745231	-7.20182	81	9	0.056962	158	5159	336471,415209,334724,337158,399646,321046,100334431,561082,559066	col1a2,tpm2,anxa1a,col1a1a,fhl1a,c3a.1,col5a1,ptrfb,myofl	0.0470414
msigdb	GO_CALMODULIN_BINDING	GO_CALMODULIN_BINDING	0.000745231	-7.20182	81	9	0.056962	158	5159	100002040,100004946,561350,798565,790934,572412,406658,394149,100037369	myhb,trpm4a,ryr3,ryr1a,mapkapk3,obscnb,cnn2,rem1,atpif1a	0.0470414
msigdb	GSE37532_VISCERAL_ADIPOSE_TISSUE_VS_LN_DERIVED_TCONV_CD4_TCELL_UP	GSE37532_VISCERAL_ADIPOSE_TISSUE_VS_LN_DERIVED_TCONV_CD4_TCELL_UP	0.00079398	-7.13845	37	6	0.0379747	158	5159	114426,553333,337010,562996,569088,393940	odc1,jph2,rpl7a,dnase2b,pdzd2,atp2a2a	0.0499428
reactome	R-DRE-390522	Striated Muscle Contraction	1.35348e-15	-34.2361	19	13	0.126214	103	2926	373076,492356,100003572,58082,30148,323320,556258,393908,751793,100149766,58143,641575,415209	tpm3,mybpc1,tnnt3b,tnnc2,desma,actn3b,tcap,tpm1,mybpc2a,tmod1,mylz3,actn2b,tpm2	1.85969e-12
reactome	R-DRE-397014	Muscle contraction	2.29153e-10	-22.1966	74	17	0.165049	103	2926	58082,492356,798565,100003572,494489,393940,373076,415209,58143,393908,323320,30148,405791,641575,100149766,751793,556258	tnnc2,mybpc1,ryr1a,tnnt3b,atp2a1l,atp2a2a,tpm3,tpm2,mylz3,tpm1,actn3b,desma,cacna1sb,actn2b,tmod1,mybpc2a,tcap	1.57428e-07
reactome	R-DRE-1474244	Extracellular matrix organization	2.34437e-07	-15.2661	114	17	0.165049	103	2926	100321011,322921,564821,100334431,394012,565429,100536858,568593,114424,567771,323696,286832,553503,337158,369195,336471,337767	si:ch211-165e15.1,wu:fb77a09,col5a2a,col5a1,itga9,hspg2,mfap5,sdc4,cdh1,col6a2,f11r.1,lamc1,fbln2,col1a1a,tgfb3,col1a2,lamb2	0.000107372
reactome	R-DRE-70171	Glycolysis	2.31199e-06	-12.9774	13	6	0.0582524	103	2926	317743,336425,572733,321664,246095,447836	gapdh,aldoaa,pgam2,aldob,gpib,pfkma	0.00079417
reactome	R-DRE-70326	Glucose metabolism	5.52921e-06	-12.1055	30	8	0.0776699	103	2926	317743,572733,321664,555748,553352,336425,246095,447836	gapdh,pgam2,aldob,ugp2a,aglb,aldoaa,gpib,pfkma	0.00151943
reactome	R-DRE-70263	Gluconeogenesis	3.19277e-05	-10.352	12	5	0.0485437	103	2926	246095,321664,572733,336425,317743	gpib,aldob,pgam2,aldoaa,gapdh	0.00731145
kegg	ko04512	ECM-receptor interaction	3.0768e-07	-14.9942	47	11	0.148649	74	2101	286832,252849,337158,568593,570643,337767,567771,336471,100535241,565429,394012	lamc1,thbs3a,col1a1a,sdc4,vwf,lamb2,col6a2,col1a2,thbs2a,hspg2,itga9	9.92269e-05
kegg	dre04512	ECM-receptor interaction	3.0768e-07	-14.9942	47	11	0.148649	74	2101	337767,567771,570643,568593,337158,252849,286832,394012,565429,336471,100535241	lamb2,col6a2,vwf,sdc4,col1a1a,thbs3a,lamc1,itga9,hspg2,col1a2,thbs2a	9.92269e-05
kegg	dre_M00001	Glycolysis (Embden-Meyerhof pathway), glucose => pyruvate	6.26664e-07	-14.2829	11	6	0.0810811	74	2101	336425,317743,321664,572733,246095,447836	aldoaa,gapdh,aldob,pgam2,gpib,pfkma	0.00010105
kegg	M00001	Glycolysis (Embden-Meyerhof pathway), glucose => pyruvate	6.26664e-07	-14.2829	11	6	0.0810811	74	2101	572733,321664,246095,336425,317743,447836	pgam2,aldob,gpib,aldoaa,gapdh,pfkma	0.00010105
kegg	ko00010	Glycolysis / Gluconeogenesis	1.08295e-05	-11.4332	24	7	0.0945946	74	2101	447836,751785,572733,321664,246095,317743,336425	pfkma,aldh1a3,pgam2,aldob,gpib,gapdh,aldoaa	0.00116417
kegg	dre00010	Glycolysis / Gluconeogenesis	1.08295e-05	-11.4332	24	7	0.0945946	74	2101	317743,336425,246095,321664,572733,751785,447836	gapdh,aldoaa,gpib,aldob,pgam2,aldh1a3,pfkma	0.00116417
kegg	dre_M00003	Gluconeogenesis, oxaloacetate => fructose-6P	4.58681e-05	-9.98974	7	4	0.0540541	74	2101	572733,321664,336425,317743	pgam2,aldob,aldoaa,gapdh	0.00369812
kegg	M00003	Gluconeogenesis, oxaloacetate => fructose-6P	4.58681e-05	-9.98974	7	4	0.0540541	74	2101	317743,336425,572733,321664	gapdh,aldoaa,pgam2,aldob	0.00369812
kegg	dre04510	Focal adhesion	0.000157996	-8.75294	102	12	0.162162	74	2101	570643,337767,567771,337158,252849,286832,449707,403146,564246,394012,336471,100535241	vwf,lamb2,col6a2,col1a1a,thbs3a,lamc1,mylk4b,akt2l,zyx,itga9,col1a2,thbs2a	0.0101907
kegg	ko04510	Focal adhesion	0.000157996	-8.75294	102	12	0.162162	74	2101	252849,286832,570643,567771,337767,337158,394012,100535241,336471,449707,403146,564246	thbs3a,lamc1,vwf,col6a2,lamb2,col1a1a,itga9,thbs2a,col1a2,mylk4b,akt2l,zyx	0.0101907

## Sheet: J_Grey
Source	TermID	Term	Enrichment	logP	Genes in Term	Target Genes in Term	Fraction of Targets in Term	Total Target Genes	Total Genes	Entrez Gene IDs	Gene Symbols	AdjustedP

[truncated: 14 more sheets: Q_Grey60, K_Lightcyan, U_Lightgreen, B_Lightyellow, L_Magenta, E_Midnightblue, D_Pink, N_Purple, G_Red, F_Royalblue, R_Salmon, S_Tan, V_Turquoise, C_Yellow]
